# Supplementary material for: Organocatalyst-mediated, pot-economical total synthesis of latanoprost
Source: Royal Society of Chemistry journal article supplement (doi:10.1039/d3sc02978f), 2023-01-01

## Materials and Methods

### General Methods

General Remark: All vinylogous Michael reactions were carried out under atmosphere and monitored by NMR and thin-layer chromatography using Merck 60 F254 precoated silica gel plates (0.25 mm thickness). Specific optical rotations were measured using a JASCO P-1020 polarimeter and a JASCO DIP-370 polarimeter. FT-IR spectra were recorded on a JASCO FT/IR-410 spectrometer and a Perkin Elmer spectrum BX FT-IP spectrometer.  $^1\text{H}$  and  $^{13}\text{C}$  NMR spectra were recorded on an Agilent-400 MR (400 MHz for  $^1\text{H}$  NMR, 100 MHz for  $^{13}\text{C}$  NMR) instrument. Data for  $^1\text{H}$  NMR are reported as chemical shift ( $\delta$  ppm), integration multiplicity (s = singlet, d = doublet, t = triplet, q = quartet, dd = doublet of doublets, ddd = doublet of doublet of doublets, dt = double of triplets, m = multiplet), coupling constant (Hz), Data for  $^{13}\text{C}$  NMR are reported as chemical shift. High resolution ESI-TOF mass spectra were measured by Thermo Orbi-trap instrument. HPLC analysis was performed on a HITACHI Elite LaChrom Series HPLC, UV detection monitored at appropriate wavelength respectively, using CHIRALPACK<sup>®</sup> OD-H (0.46 cm  $\times$  25 cm) and CHIRALPACK<sup>®</sup> AS-H (0.46 cm  $\times$  25 cm). Melting point apparatus was Yanaco MP-J3. All the reagents were purchased from commercial sources (ALDRICH, Combi-Blocks, FUJIFILM Wako Chemicals, KANTO CHEMICAL, TCI), used without further purification.

All reactions were carried out in oven-dried (120 °C) or flame-dried glassware under an inert atmosphere of dry argon unless otherwise stated.

Solvents were purged with argon and purified under a positive pressure of dry argon by a modified Innovative Technologies purification system: toluene, THF, DMF, Et<sub>2</sub>O, and CH<sub>2</sub>Cl<sub>2</sub> were passed through activated alumina columns. Dehydrated EtOAc was used for the reaction without further purification (FUJIFILM Wako Chemicals, catalog No. 057-08175).

## Preparation of nitroalkene

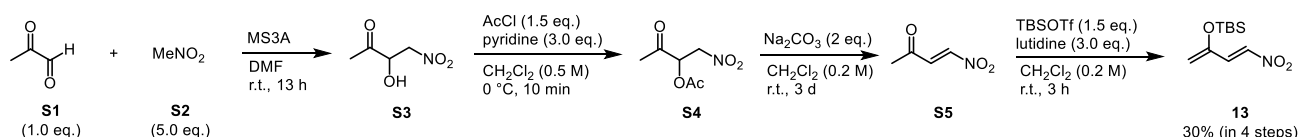

To a solution of methylglyoxal (**S1**) (40 wt% in H<sub>2</sub>O, 4.6 mL, 30 mmol) in DMF (60 mL), nitromethane (**S2**) (8.0 mL, 0.15 mol, 5.0 eq.) and activated MS3Å (16 g) were added. After stirring at room temperature for 4 h, the reaction mixture was filtered through Celite<sup>®</sup>, washed with Et<sub>2</sub>O, and concentrated in vacuo at 45 °C. Compound **S3** was obtained without column purification.

The crude was dissolved in anhydrous CH<sub>2</sub>Cl<sub>2</sub> (121 mL) and added pyridine (5.3 mL, 66 mmol, 3.0 eq.) and acetyl chloride (2.4 mL, 33 mmol, 1.5 eq.) at 0 °C. After stirring at 0 °C for 10 min, the reaction mixture was quenched with 1N HCl (50 mL), extracted with CH<sub>2</sub>Cl<sub>2</sub> (3 × 50 mL). The combined organic layer was washed with 1N HCl, water, and brine, dried with Na<sub>2</sub>SO<sub>4</sub>, filtered and concentrated in vacuo. Compound **S4** was obtained without column purification.

The crude was dissolved to anhydrous CH<sub>2</sub>Cl<sub>2</sub> (108 mL) and added mashed Na<sub>2</sub>CO<sub>3</sub> (4.6 g, 43 mmol, 2 eq.) at 0 °C. After stirring at room temperature for 3 days, the reaction mixture was filtered through silica pad on Celite<sup>®</sup>, washed with CH<sub>2</sub>Cl<sub>2</sub>, and concentrated in vacuo. Compound **S5** was obtained without column purification.

The crude was dissolved to anhydrous CH<sub>2</sub>Cl<sub>2</sub> (71 mL) and added 2,6-lutidine (4.9 mL, 42 mmol, 3.0 eq.) and TBSOTf (4.6 mL, 21 mmol, 1.5 eq.) at 0 °C. After stirring at room temperature for 3 h, the reaction mixture was quenched with sat. NaHCO<sub>3</sub> aq. (50 mL) and extracted with CH<sub>2</sub>Cl<sub>2</sub> (3 × 50 mL). The combined organic layer was washed with water and brine, dried with Na<sub>2</sub>SO<sub>4</sub>, filtered and concentrated in vacuo. Purification by silica gel chromatography (*n*-Hexane: EtOAc = 15:1) gave compound **13** in 30% yield (4 steps, 2.1 g).

### (*E*)-4-nitrobut-3-en-2-one

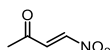

**Physical State:** yellow liquid

**<sup>1</sup>H NMR (400 MHz, CDCl<sub>3</sub>)** δ 7.53 (d, *J* = 14.0 Hz, 1H), 7.25 (d, *J* = 14.0 Hz, 1H), 2.45 (s, 3H)

**<sup>13</sup>C NMR (100 MHz, CDCl<sub>3</sub>)** δ 194.9, 147.3, 132.2, 29.5

**IR (neat)** ν 2254, 1711, 1697, 1632, 1542, 1350, 1285, 1240, 912, 741, 651

**R<sub>f</sub>** (*n*-Hexane: EtOAc = 1:1, color reagent: KMnO<sub>4</sub> reagent): 0.60

### (*E*)-*tert*-butyldimethyl((4-nitrobuta-1,3-dien-2-yl)oxy)silane

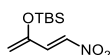

**Physical State:** orange liquid

**<sup>1</sup>H NMR (400 MHz, CDCl<sub>3</sub>)** δ 7.37 (d, *J* = 12.8 Hz, 1H), 7.22 (d, *J* = 12.8 Hz, 1H), 4.88 (d, *J* = 1.6 Hz, 1H), 4.83 (d, *J* = 1.6 Hz, 1H), 0.98 (s, 9H), 0.22 (s, 6H)

**<sup>13</sup>C NMR (100 MHz, CDCl<sub>3</sub>)** δ 232.0, 137.1, 133.9, 106.9, 25.6 (3C), 18.2, -4.7 (2C)

**IR (neat)**  $\nu$  2957, 2932, 2887, 2860, 1633, 1594, 1520, 1472, 1345, 1263, 1211, 1026, 954, 842, 785, 742

**HRMS (ESI):**  $[M+Na]^+$  calcd for  $C_{10}H_{19}O_3SiNa^+$ : 252.1026, found: 252.1027

**R<sub>f</sub>** (*n*-Hexane: EtOAc = 3:1, color reagent: *p*-anisaldehyde): 0.70

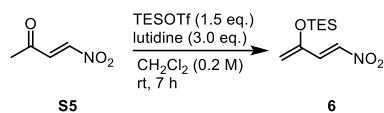

**55** (1.05 g, 9.12 mmol) was dissolved to anhydrous CH<sub>2</sub>Cl<sub>2</sub> (46 mL) and added 2,6-lutidine (4.23 mL, 36.5 mmol, 3.0 eq.) and TESOTf (4.12 mL, 18.2 mmol, 2 eq.) at 0 °C. After stirring at room temperature for 7 h, the reaction mixture was quenched with sat. aq. NaHCO<sub>3</sub> (40 mL) and extracted with CH<sub>2</sub>Cl<sub>2</sub> (3 × 50 mL). The combined organic layer was washed with water and brine, dried with Na<sub>2</sub>SO<sub>4</sub>, filtered and added toluene (4 mL) and concentrated in vacuo (200 mm Hg, 25 °C). Purification by silica gel chromatography (*n*-Hexane/ EtOAc = 15/1) then combined organic layers were added toluene (4 mL) and concentration in vacuo (100 mmHg, 25 °C) gave compound **6** as a toluene solution.

(Compound **6** was unstable in concentration.)

#### (*E*)-triethyl((4-nitrobuta-1,3-dien-2-yl)oxy)silane

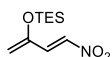

toluene solution

**<sup>1</sup>H NMR** (400 MHz, CDCl<sub>3</sub>)  $\delta$  7.36 (d,  $J$  = 12.8 Hz, 1H), 7.26-7.24 (m, 1H), 4.84 (dd,  $J$  = 11.2, 1.6 Hz, 2H), 1.02-0.97 (m, 9H), 0.78-0.74 (m, 6H)

**R<sub>f</sub>** (*n*-hexane/ EtOAc = 3:1, color reagent: *p*-anisaldehyde): 0.70

#### Preparation of aldehyde

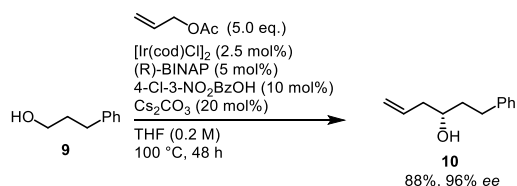

A pressure tube was charged with 3-phenylpropanol **9** (2.7 mL, 20 mmol), [Ir(cod)Cl]<sub>2</sub> (0.34 g, 0.50 mmol, 2.5 mol%), (*R*)-BINAP (0.62 g, 1.0 mmol, 5.0 mol%), 4-chloro-3-nitrobenzoic acid (0.40 g, 2.0 mmol, 10 mol%), cesium carbonate (1.3 g, 4.0 mmol, 20 mol%), anhydrous THF (40 mL), and allyl acetate (11 mL, 100 mmol, 5.0 eq.). The pressure tube was purged with argon, sealed and heated 100 °C (oil bath temperature) and stirred for 48 h. The reaction mixture was allowed to cool to room temperature and filtered through Celite<sup>®</sup> pad with the aid of CH<sub>2</sub>Cl<sub>2</sub>. The crude reaction mixture was concentrated in vacuo. Purification by silica gel chromatography (*n*-Hexane: EtOAc = 6 : 1) gave compound **10** in 88% yield (3.1 g).

#### (*S*)-1-phenylhex-5-en-3-ol

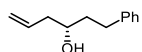

**Physical State:** pale yellow solid

**<sup>1</sup>H NMR (400 MHz, CDCl<sub>3</sub>)** δ 7.31-7.27 (m, 2H), 7.22-7.19 (m, 3H), 5.87-5.77 (m, 1H), 5.16-5.16 (m, 2H), 5.13-5.13 (m, 1H), 3.71-3.65 (m, 1H), 2.85-2.78 (m, 1H), 2.73-2.65 (m, 1H), 2.36-2.30 (m, 1H), 2.22-2.15 (m, 1H), 1.82-1.77 (m, 2H)

**<sup>13</sup>C NMR (100 MHz, CDCl<sub>3</sub>)** δ 141.9, 134.5, 128.3 (4C), 125.7, 118.0, 69.9, 41.9, 38.3, 31.9.

**IR (neat)** ν 3564, 3352, 3063, 3027, 3003, 2977, 2930, 2861, 1712, 1641, 1603, 1496, 1454, 1266, 1154, 1126, 1048, 995, 916, 865, 747, 700, 646

**HRMS (ESI):** [M+Na]<sup>+</sup> calcd for C<sub>12</sub>H<sub>16</sub>ONa<sup>+</sup>: 199.1093, found: 199.1099

[α]<sub>D</sub><sup>22</sup> -23.5 (*c* 0.68, CHCl<sub>3</sub>)

mp. 33-34 °C

**R<sub>f</sub>** (*n*-Hexane: EtOAc = 3:1, color reagent: *p*-anisaldehyde): 0.48

The enantiomeric ratio was determined by HPLC using CHIRALPACK<sup>®</sup> OD-H (*n*-Hexane: *i*-PrOH = 50:1; flow rate 1.0 mL/min, major isomer *t<sub>R</sub>* = 12 min, minor isomer *t<sub>R</sub>* = 18 min) (96% *ee*)

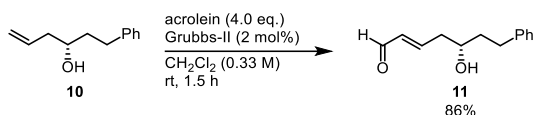

A solution of compound **10** (0.56 g, 3.2 mmol) in anhydrous CH<sub>2</sub>Cl<sub>2</sub> (9.6 mL) was freeze-pump-thaw for three times. Acrolein (0.85 mL, 13 mmol, 4.0 eq.) and Grubbs-II (54 mg, 0.064 mmol, 2.0 mol%) were added at 0 °C then warmed to room temperature. After stirring at room temperature for 1.5 h, the reaction mixture was concentrated in vacuo. Purification by silica gel chromatography (*n*-Hexane: EtOAc = 4:1 to 2:1) gave compound **11** in 86% yield (0.56 g).

### (*S,E*)-5-hydroxy-7-phenylhept-2-enal

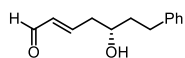

**Physical State:** colorless liquid

**<sup>1</sup>H NMR (400 MHz, CDCl<sub>3</sub>)** δ 9.53 (d, *J* = 8.0 Hz, 1H), 7.32-7.28 (m, 2H), 7.23-7.19 (m, 3H), 6.89 (dt, *J* = 15.2, 7.2 Hz, 1H), 6.18 (dd, *J* = 15.6 Hz, 1H), 3.88-3.82 (m, 1H), 2.82 (ddd, *J* = 14.4, 7.6, 7.6 Hz, 1H), 2.75-2.68 (m, 1H), 2.60-2.46 (m, 2H), 1.87-1.82 (m, 2H)

**<sup>13</sup>C NMR (100 MHz, CDCl<sub>3</sub>)** δ 193.9, 154.8, 141.3, 134.8, 128.4 (2C), 128.3 (2C), 126.0, 69.6, 40.6, 38.8, 31.8.

**IR (neat)** ν 3447, 3056, 3029, 2986, 2936, 2861, 2744, 1685, 1638, 1603, 1496, 1454, 1421, 1266, 1134, 1049, 1011, 976, 929, 897, 698

**HRMS (ESI):** [M+Na]<sup>+</sup> calcd for C<sub>13</sub>H<sub>16</sub>O<sub>2</sub>Na<sup>+</sup>: 227.1043, found: 227.1051

[α]<sub>D</sub><sup>25</sup> -8.3 (*c* 1.06, CHCl<sub>3</sub>)

**R<sub>f</sub>** (*n*-Hexane: EtOAc = 2:1, color reagent: *p*-anisaldehyde): 0.29

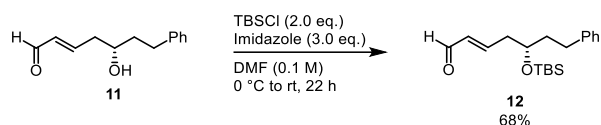

To a solution of compound **11** (0.54 g, 2.6 mmol) in anhydrous DMF (13 mL), imidazole (0.54 g, 7.9 mmol, 3.0 eq.) and TBSCl (0.80 g, 5.3 mmol, 2.0 eq.) were added at 0 °C. After stirring room temperature for 22 h, the reaction mixture was quenched with sat. NH<sub>4</sub>Cl aq. at 0 °C and extracted with *n*-hexane/ EtOAc (3/1, 3 × 50 mL). The combined organic layer was washed with water and brine, dried with anhydrous Na<sub>2</sub>SO<sub>4</sub>, filtered and concentrated in vacuo. Purification by silica gel chromatography (*n*-Hexane: EtOAc = 20:1 to 15:1) gave compound **12** in 68% yield (0.57 g).

### (*S,E*)-5-((*tert*-butyldimethylsilyl)oxy)-7-phenylhept-2-enal

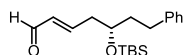

**Physical State:** yellow liquid

**<sup>1</sup>H NMR (400 MHz, CDCl<sub>3</sub>)** δ 9.52 (d, *J* = 8.0 Hz, 1H), 7.31-7.29 (m, 2H), 7.21-7.16 (m, 3H), 6.89 (dt, *J* = 15.6, 7.6 Hz, 1H), 6.14 (ddt, *J* = 15.6, 7.6, 1.2 Hz, 1H), 3.94-3.89 (m, 1H), 2.74-2.45 (m, 4H), 1.82-1.76 (m, 2H), 0.91 (s, 9 H), 0.08 (s, 3H), 0.06 (s, 3H)

**<sup>13</sup>C NMR (100 MHz, CDCl<sub>3</sub>)** δ 193.8, 154.9, 141.8, 134.9, 128.5 (2C), 128.3 (2C), 125.9, 70.6, 40.4, 39.1, 31.7, 25.8 (3C), 18.1, -4.4, -4.5.

**IR (neat)** ν 3028, 2952, 2929, 2857, 1694, 1638, 1496, 1472, 1462, 1362, 1256, 1137, 1072, 1031, 1007, 978, 938, 837, 776, 747, 700

**HRMS (ESI):** [M+Na]<sup>+</sup> calcd for C<sub>19</sub>H<sub>30</sub>O<sub>2</sub>SiNa<sup>+</sup>:341.1907, found: 341.1925

[α]<sub>D</sub><sup>25</sup> -4.2 (*c* 0.82, CHCl<sub>3</sub>)

**R<sub>f</sub>** (*n*-Hexane: EtOAc = 5:1, color reagent: *p*-anisaldehyde): 0.58

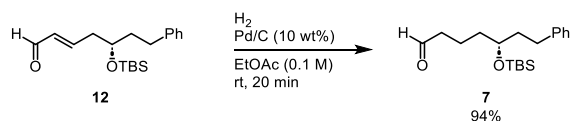

To a solution of compound **12** (0.56 g, 1.8 mmol) in EtOAc (18 mL), Pd/C (10 wt%, 0.056 g) was added at room temperature. The reaction mixture was purged with H<sub>2</sub>. After stirring for 20 min under H<sub>2</sub> (balloon pressure), the reaction mixture was purged with N<sub>2</sub> and filtered through Celite<sup>®</sup>, washed with EtOAc, and concentrated in vacuo. Purification by silica gel chromatography (*n*-Hexane: EtOAc = 20:1 to 10:1) gave compound **7** in 94% yield (0.53 g).

### (*R*)-5-((*tert*-butyldimethylsilyl)oxy)-7-phenylheptanal

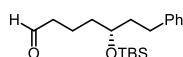

**Physical State:** colorless liquid

**<sup>1</sup>H NMR (400 MHz, CDCl<sub>3</sub>)** δ 9.76 (t, *J* = 1.6 Hz, 1H), 7.30-7.27 (m, 2H), 7.19-7.16 (m, 3H), 3.74 (tt, *J* = 4.2, 4.2 Hz, 1H), 2.71-2.58 (m, 2H), 2.44 (td, *J* = 7.2, 1.6 Hz, 2H), 1.79-1.65 (m, 4H), 1.53-1.49 (m, 2H), 0.91 (s, 9H), 0.06 (s, 3H), 0.05 (s, 3H)

**<sup>13</sup>C NMR (100 MHz, CDCl<sub>3</sub>)** δ 202.5, 142.5, 128.3 (2C), 128.3 (2C), 125.7, 71.4, 43.9, 38.8, 36.2, 31.6, 25.9 (3C), 18.1, 17.8, -4.4 (2C)

**IR (neat)** ν 2952, 2929, 2857, 1727, 1472, 1461, 1255, 1097, 1065, 1006, 836, 774, 748, 699

**HRMS (ESI):** [M+Na]<sup>+</sup> calcd for C<sub>19</sub>H<sub>32</sub>O<sub>2</sub>SiNa<sup>+</sup>: 343.2064, found: 343.2017

[α]<sub>D</sub><sup>25</sup> +2.1 (*c* 0.96, CHCl<sub>3</sub>)

**R<sub>f</sub>** (*n*-Hexane: EtOAc = 7:1, color reagent: *p*-anisaldehyde): 0.38

### One-pot operation

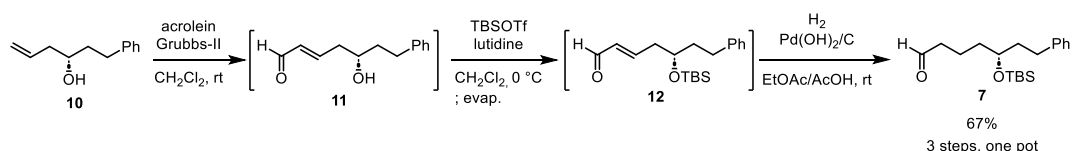

A solution of compound **10** (1.34 g, 7.60 mmol) in anhydrous CH<sub>2</sub>Cl<sub>2</sub> (22.8 mL) was freeze-pump-thaw for three times. Acrolein (2.03 mL, 30.4 mmol, 4.0 eq.) and Grubbs- II (129 mg, 0.152 mmol, 2.0 mol%) were added at 0 °C then warmed to room temperature. After stirring at room temperature for 4.5 h, reaction mixture was cooled to 0 °C. 2,6-lutidine (2.64 mL, 22.8 mmol, 3.0 eq.) and TBSOTf (3.49 mL, 15.2 mmol, 2.0 eq.) were added at 0 °C. After stirring at this temperature for 15 min, the reaction mixture was concentrated in vacuo. The resulting mixture was added EtOAc (38.0 mL), AcOH (38.0 mL) and Pd(OH)<sub>2</sub>/C (10 wt%, wet, 485 mg) and reaction vessel was purged with H<sub>2</sub>. After stirring for 30 min at room temperature under H<sub>2</sub> (balloon pressure), the reaction mixture was purged with N<sub>2</sub> and filtered through Celite<sup>®</sup> and washed with EtOAc. The organic layer was washed with water and brine, dried with anhydrous Na<sub>2</sub>SO<sub>4</sub>, filtered and concentrated in vacuo. Purification by silica gel chromatography (*n*-Hexane: EtOAc = 30:1) gave compound **7** in 67% yield (1.63 g).

### Asymmetric Michael reaction

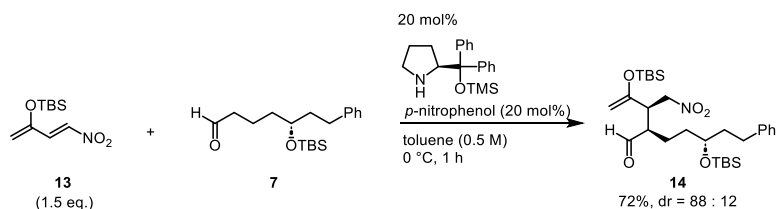

To a mixture of aldehyde **7** (0.16 g, 0.49 mmol, 1.0 eq.) and nitroalkene **13** (0.17 g, 0.74 mmol, 1.5 eq.) in anhydrous toluene (0.98 mL), *p*-nitrophenol (14 mg, 0.098 mmol, 20 mol%) and catalyst (32 mg, 0.098 mmol, 20 mol%) were added at 0 °C. After stirring for 1 h at 0 °C, the reaction mixture was purified by silica gel chromatography (*n*-Hexane/ EtOAc = 15/1). Compound **14** was obtained in 72% yield (0.19 g) as a diastereomixture.

**(2*R*,5*R*)-5-((*tert*-butyldimethylsilyl)oxy)-2-((*R*)-3-((*tert*-butyldimethylsilyl)oxy)-1-nitrobut-3-en-2-yl)-7-phenylheptanal**

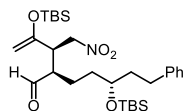

dr = 88 : 12

**Physical State:** yellow liquid

**<sup>1</sup>H NMR (400 MHz, CDCl<sub>3</sub>)** δ 9.65 (d, *J* = 2.8 Hz, 1 H), 7.30-7.28 (m, 2H), 7.20-7.14 (m, 3H), 4.52-4.41 (m, 2H), 3.72-3.66 (m, 1H), 3.22-3.16 (m, 1H), 2.61-2.56 (m, 2H), 2.53-2.47 (m, 1H), 1.80-1.67 (m, 4H), 1.59-1.50 (m, 2H), 1.43-1.35 (m, 1H), 0.93 (s, 9H), 0.90 (s, 9H), 0.19 (s, 6H), 0.05 (s, 3H), 0.02 (s, 3H)

**<sup>13</sup>C NMR (100 MHz, CDCl<sub>3</sub>)** δ 202.9, 152.9, 142.1, 128.4 (2C), 128.2 (2C), 125.8, 93.5, 75.7, 71.4, 50.7, 44.7, 38.5, 33.3, 31.6, 25.9 (3C), 25.6 (3C), 22.6, 18.1, 18.0, -4.5 (2C), -4.8, -5.4

**IR (neat)** ν 2954, 2930, 2886, 2858, 1726, 1635, 1556, 1471, 1378, 1313, 1256, 1033, 839, 775, 699

**HRMS (ESI):** [M+Na]<sup>+</sup> calcd for C<sub>29</sub>H<sub>51</sub>NO<sub>5</sub>Si<sub>2</sub>Na<sup>+</sup>: 572.3198, found: 572.3198

[α]<sub>D</sub><sup>25</sup> +44.4 (*c* 1.010, CHCl<sub>3</sub>)

**R<sub>f</sub>** (*n*-Hexane: EtOAc = 3:1, color reagent: *p*-anisaldehyde): 0.60

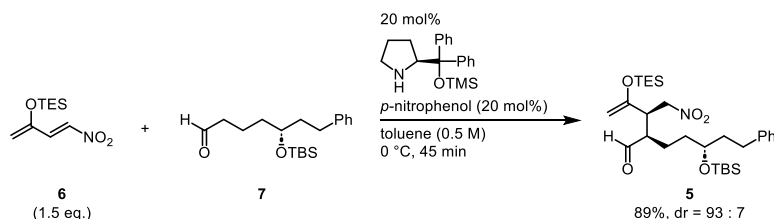

To a mixture of aldehyde **7** (1.05 g, 3.28 mmol, 1.0 eq.) in anhydrous toluene (5.25 mL) was added the toluene solution of nitroalkene **6** (43% in toluene, 2.62 g, 1.5 mmol, 1.5 eq.). The mixture was cooled to 0 °C, then *p*-nitrophenol (91.1 mg, 0.655 mmol, 20 mol%) and catalyst (213 mg, 0.655 mmol, 20 mol%) were added. After stirring for 45 min at 0 °C, the reaction mixture was passed through the pad of silica and washed with ice cooled *n*-hexane/EtOAc = 20/1 and concentrated in vacuo. Purified by silica gel chromatography (*n*-Hexane/CH<sub>2</sub>Cl<sub>2</sub> = 2 : 1 to *n*-Hexane/EtOAc = 30:1). Compound **5** was obtained in 89% yield (1.60 g).

**(2*R*,5*R*)-5-((*tert*-butyldimethylsilyl)oxy)-2-((*R*)-1-nitro-3-((triethylsilyl)oxy)but-3-en-2-yl)-7-phenylheptanal**

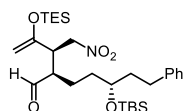

dr = 93 : 7

**Physical State:** yellow liquid

**<sup>1</sup>H NMR (400 MHz, CDCl<sub>3</sub>)** δ 9.65 (d, *J* = 2.8 Hz, 1H), 7.30-7.28 (m, 2H), 7.18-7.15 (m, 3H), 4.53 (dd, *J* = 12.0, 10.0 Hz, 1H), 4.42 (dd, *J* = 12.4, 4.4 Hz, 1H), 4.18 (d, *J* = 2.0 Hz, 1H), 4.14 (d, *J* = 2.0 Hz, 1H), 3.72-3.67 (m, 1H), 3.22 (td, *J* = 9.2, 4.4 Hz, 1H), 2.67-2.50 (m, 4H), 1.77-1.70 (m, 4H), 0.96 (t, *J* = 7.6 Hz, 9H), 0.90 (s, 9H), 0.71 (q, *J*

= 7.6 Hz, 6H), 0.05 (s, 3H), 0.02 (s, 3H)

$^{13}\text{C}$  NMR (100 MHz,  $\text{CDCl}_3$ )  $\delta$  202.8, 153.2, 142.2, 128.3 (2C), 128.2 (2C), 125.7, 92.6, 75.5, 71.4, 50.8, 44.7, 38.5, 33.4, 31.6, 25.8 (3C), 22.4, 18.0, 6.6 (3C), 4.5 (3C), -4.5 (2C)

IR (neat)  $\nu$  2955, 2931, 2878, 2857, 1725, 1633, 1556, 1457, 1379, 1274, 1254, 1092, 1065, 1031, 1006, 836, 775, 736, 700

HRMS (ESI):  $[\text{M}+\text{Na}]^+$  calcd for  $\text{C}_{29}\text{H}_{51}\text{NO}_5\text{Si}_2\text{Na}^+$ : 572.3198, found: 572.3198

$[\alpha]_{\text{D}}^{26} +32.7$  ( $c$  0.980,  $\text{CHCl}_3$ )

$R_f$  ( $n$ -Hexane: EtOAc = 3:1, color reagent:  $p$ -anisaldehyde): 0.60

### Intramolecular Mukaiyama aldol reaction catalyzed by $\text{Me}_2\text{AlCl}$

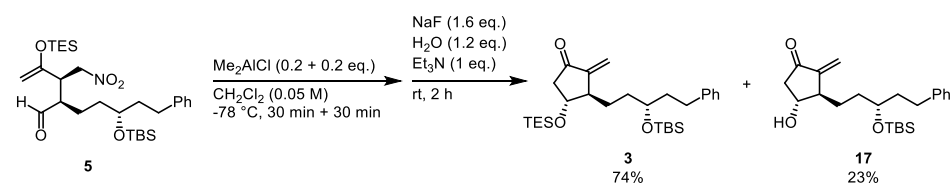

To a solution of compound **5** (1.15 g, 2.09 mmol, 1.0 eq.) (**5** were azeotropic with benzene three times.) in anhydrous  $\text{CH}_2\text{Cl}_2$  (41.8 mL) was added  $\text{Me}_2\text{AlCl}$  (1.0 M in  $n$ -Hexane, 418  $\mu\text{L}$ , 0.418 mmol, 0.20 eq.) in 10 min at  $-78^\circ\text{C}$ . After stirring for 30 min at this temperature, additional  $\text{Me}_2\text{AlCl}$  (418  $\mu\text{L}$ , 0.418 mmol, 0.20 eq.) was added in 10 min. After stirring for 30 min at this temperature, the reaction mixture was added NaF (141 mg, 3.35 mmol, 1.6 eq.) and water (45.2  $\mu\text{L}$ , 2.51 mmol, 1.2 eq.), allowed to warm to room temperature. The resulting suspension was added  $\text{Et}_3\text{N}$  (291  $\mu\text{L}$ , 2.09 mmol, 1.0 eq.). After stirring for 2 h at room temperature, the resulting suspension was filtered, washed with  $\text{CH}_2\text{Cl}_2$  and the filtrate was concentrated in vacuo. Purification by silica gel chromatography ( $n$ -Hexane:  $\text{Et}_2\text{O}$  = 30:1 to 1:1) gave compound **3** and **17** in 74% (776 mg) and 23% (189 mg) yield respectively.

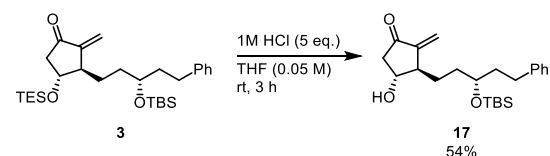

To a solution of compound **3** (8.4 mg, 17  $\mu\text{mol}$ , 1.0 eq.) in THF (0.33 mL) was added HCl (1 M in  $\text{H}_2\text{O}$ , 84  $\mu\text{L}$ , 84  $\mu\text{mol}$ , 5.0 eq.) at rt. After stirring for 30 min at this temperature, the reaction mixture was quenched by the addition of phosphorus buffer and extracted with  $\text{Et}_2\text{O}$  three times. The combined organic layer was washed with brine, dried with anhydrous  $\text{MgSO}_4$ , filtered and concentrated in vacuo. Purification by silica gel chromatography ( $n$ -Hexane: EtOAc = 9:1 to 3:1) gave compound **17** in 54% yield (3.5 mg).

### (3*R*,4*R*)-4-((*tert*-butyldimethylsilyl)oxy)-3-((*R*)-3-((*tert*-butyldimethylsilyl)oxy)-5-phenylpentyl)-2-methylenecyclopentan-1-one

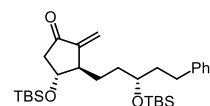



**Physical State:** yellow liquid

**<sup>1</sup>H NMR (400 MHz, CDCl<sub>3</sub>)** δ 7.30-7.28 (m, 2H), 7.20-7.16 (m, 3H), 6.08 (d, *J* = 2.0 Hz, 1H), 5.28 (d, *J* = 2.0 Hz, 1H), 4.09 (ddd, *J* = 4.8, 4.8, 4.8 Hz, 1H), 3.76-3.70 (m, 1H), 2.71-2.62 (m, 3H), 2.51 (dd, *J* = 18.0, 6.0, 1H), 2.30 (dd, *J* = 18.0, 4.8 Hz, 1H), 1.80-1.74 (m, 2H), 1.67-1.59 (m, 3H), 0.91 (s, 9H), 0.87 (s, 9H), 0.08 (s, 3H), 0.06 (s, 3H), 0.06 (s, 3H), 0.04 (s, 3H)

**<sup>13</sup>C NMR (100 MHz, CDCl<sub>3</sub>)** δ 204.5, 147.4, 142.4, 128.4 (2C), 128.3 (2C), 125.7, 118.1, 72.3, 71.8, 51.1, 46.9, 39.1, 34.1, 31.7, 27.7, 25.9 (3C), 25.7 (3C), 18.1, 17.9, -4.3, -4.4, -4.5, -4.8

**IR (neat)** ν 2953, 2929, 2857, 1732, 1645, 1468, 1255, 1098, 1065, 909, 836, 774, 738, 700

**HRMS (ESI):** [M+Na]<sup>+</sup> calcd for C<sub>29</sub>H<sub>50</sub>O<sub>3</sub>Si<sub>2</sub>Na<sup>+</sup>: 525.3191, found: 525.3191

[α]<sub>D</sub><sup>29</sup> -16.4 (*c* 1.540, CHCl<sub>3</sub>)

**R<sub>f</sub>** (*n*-hexane/ EtOAc = 3:1, color reagent: *p*-anisaldehyde): 0.62

**(3*R*,4*R*)-3-((*R*)-3-((*tert*-butyldimethylsilyloxy)-5-phenylpentyl)-2-methylene-4-((triethylsilyloxy)cyclopentan-1-one**

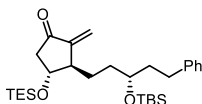

**Physical State:** yellow liquid

**<sup>1</sup>H NMR (400 MHz, CDCl<sub>3</sub>)** δ 7.30-7.27 (m, 2H), 7.20-7.17 (m, 3H), 6.09 (d, *J* = 2.0 Hz, 1H), 5.29 (dd, *J* = 2.4, 0.8 Hz, 1H), 4.10 (q, *J* = 6.0 Hz, 1H), 3.76-3.71 (m, 1H), 2.70-2.57 (5H), 2.31 (dd, *J* = 17.6, 4.8 Hz, 1H), 1.80-1.74 (m, 2H), 1.68-1.58 (m, 4H), 0.95 (t, *J* = 7.6 Hz, 9H), 0.91 (s, 9H), 0.60 (q, *J* = 7.6 Hz, 6H), 0.07 (s, 3H), 0.04 (s, 3H)

**<sup>13</sup>C NMR (100 MHz, CDCl<sub>3</sub>)** δ 204.5, 147.4, 142.4, 128.4 (2C), 128.3 (2C), 125.7, 118.2, 72.1, 71.7, 51.1, 46.9, 39.1, 34.1, 31.7, 27.7, 25.9 (3C), 18.1, 6.8 (3C), 4.8 (3C), -4.3, -4.4

**IR (neat)** ν 2954, 2932, 2877, 2857, 1733, 1254, 1095, 1067, 836, 774, 745

**HRMS (ESI):** [M+Na]<sup>+</sup> calcd for C<sub>29</sub>H<sub>50</sub>O<sub>3</sub>Si<sub>2</sub>Na<sup>+</sup>: 525.3191, found: 525.3190

[α]<sub>D</sub><sup>29</sup> -8.7 (*c* 1.540, CHCl<sub>3</sub>)

**R<sub>f</sub>** (*n*-Hexane: EtOAc = 3:1, color reagent: *p*-anisaldehyde): 0.71

The enantiomeric ratio was determined by HPLC using CHIRALPACK® OD-H (*n*-Hexane: *i*-PrOH = 2000:1; flow rate 1.0 mL/min, major isomer *t<sub>R</sub>* = 15 min, minor isomer *t<sub>R</sub>* = 14 min) (>99% *ee*)

The diastereomeric ratio was determined after the deprotection of TES group.

**(3*R*,4*R*)-3-((*R*)-3-((*tert*-butyldimethylsilyloxy)-5-phenylpentyl)-4-hydroxy-2-methylenecyclopentan-1-one**

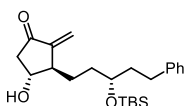

**Physical State:** yellow oil

**<sup>1</sup>H NMR (400 MHz, CDCl<sub>3</sub>)** δ 7.30-7.27 (m, 2H), 7.20-7.17 (m, 3H), 6.13 (d, *J* = 2.0 Hz, 1H), 5.33 (d, *J* = 2.0 Hz, 1H), 4.22-4.28 (m, 1H), 3.77 (m, 1H), 2.73-2.56 (m, 5H), 2.37 (dd, *J* = 17.6, 4.0 Hz, 1H), 1.80-1.75 (m, 3H), 1.68-

1.59 (m, 4H), 0.90 (s, 9H), 0.07 (s, 3H), 0.04 (s, 3H)

$^{13}\text{C}$  NMR (100 MHz,  $\text{CDCl}_3$ )  $\delta$  204.0, 147.2, 142.4, 128.4 (2C), 128.3 (2C), 125.8, 118.9, 72.0, 71.6, 50.5, 46.2, 38.9, 38.8, 33.9, 27.8, 25.9 (3C), 18.1, -4.3, -4.4

IR (neat)  $\nu$  2951, 2928, 2856, 1730, 1254, 1092, 1065, 835, 774, 699

HRMS (ESI):  $[\text{M}+\text{Na}]^+$  calcd for  $\text{C}_{23}\text{H}_{36}\text{O}_3\text{SiNa}^+$ : 411.2326, found: 411.2327

$[\alpha]_{\text{D}}^{29} +6.9$  ( $c$  1.110,  $\text{CHCl}_3$ )

$R_f$  ( $n$ -Hexane: EtOAc = 3:1, color reagent:  $p$ -anisaldehyde): 0.13

The diastereomeric ratio was determined by HPLC using CHIRALPACK<sup>®</sup> AS-H ( $n$ -Hexane:  $i$ -PrOH = 99:1; flow rate 1.0 mL/min, major isomer  $t_R$  = 37 min, minor isomer  $t_R$  = 26 min) ( $dr$  = 97.3 : 2.6,  $dr$  = 81.6 : 18.4)

## Addition of vinyl cuprate

### Optimization

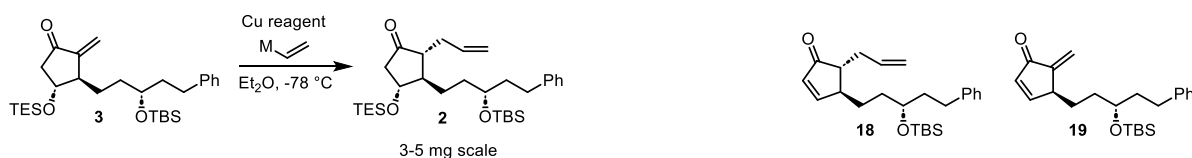

| Entry          | Cu reagent [eq.]                              | M [eq.]   | Additive [eq.]                        | Time [min] | Yield [%] | Comments                                                      |
|----------------|-----------------------------------------------|-----------|---------------------------------------|------------|-----------|---------------------------------------------------------------|
| 1              | CuI [7.5]                                     | MgBr [15] | -                                     | 240        | n.d.      | no reaction                                                   |
| 2              | CuI [7.5]                                     | MgBr [15] | PBu <sub>3</sub> [8]                  | 20         | 40        | -                                                             |
| 3              | [CuI(PBu <sub>3</sub> ) <sub>4</sub> ] [1.25] | Li [10]   | -                                     | 10         | 68        | <b>18</b> : ~17% <sup>c</sup>                                 |
| 4              | [CuI(PBu <sub>3</sub> ) <sub>4</sub> ] [1.25] | Li [10]   | TMSCl [5]                             | 60         | 25        | <b>18</b> : ~20% <sup>c</sup> , <b>19</b> : ~28% <sup>c</sup> |
| 5              | [CuI(PBu <sub>3</sub> ) <sub>4</sub> ] [1.25] | Li [10]   | BF <sub>3</sub> ·OEt <sub>2</sub> [5] | 10         | 74        | -                                                             |
| 6 <sup>a</sup> | [CuI(PBu <sub>3</sub> ) <sub>4</sub> ] [0.5]  | Li [4]    | BF <sub>3</sub> ·OEt <sub>2</sub> [2] | 10         | 90        | -                                                             |
| 7 <sup>b</sup> | [CuI(PBu <sub>3</sub> ) <sub>4</sub> ] [0.5]  | Li [4]    | BF <sub>3</sub> ·OEt <sub>2</sub> [2] | 10         | 83        | -                                                             |

<sup>a</sup> 50 mg scale. <sup>b</sup> 1.00 g scale. <sup>c</sup> estimated by crude NMR.

[CuI(PBu<sub>3</sub>)<sub>4</sub>] and vinyl lithium were prepared according to reported procedure.<sup>1,2)</sup>

To a solution Cu reagent in anhydrous Et<sub>2</sub>O (0.15 mL) was added vinyl metal reagent slowly at -45 °C. After stirring for 30 min at this temperature, the reaction mixture was cooled to -78 °C and added additive. the resulting mixture was added compound **3** (3.0 mg, 6.0  $\mu\text{mol}$ ) in anhydrous Et<sub>2</sub>O (50  $\mu\text{L}$ ) in 5 min. After stirring for indicated time, the reaction mixture was quenched by the addition of phosphorus buffer and extracted with Et<sub>2</sub>O three times. The combined organic layer was washed with sat. NH<sub>4</sub>Cl aq., water and brine, dried with anhydrous MgSO<sub>4</sub>, filtered and concentrated in vacuo. Purification by silica gel chromatography ( $n$ -Hexane: CH<sub>2</sub>Cl<sub>2</sub> = 2 : 1 to  $n$ -Hexane: EtOAc = 30 : 1) gave compound **2**.

The yield of **18** and **19** was estimated by crude NMR (entries 3, 4) and the crude NMR of entries 3, 4, 7 were shown later page.

### Optimized reaction procedure (entry 7)

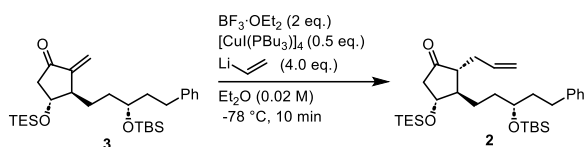

To a solution  $[\text{CuI}(\text{PBu}_3)_4]$  (1.56 g, 994  $\mu\text{mol}$ , 0.50 eq.) in anhydrous  $\text{Et}_2\text{O}$  (66.3 mL) was added vinyl lithium (0.84 M in  $\text{Et}_2\text{O}$ , 9.51 mL, 7.95 mmol, 4.0 eq.) slowly (over 25 min, the color of solution was changed colorless to brown, then yellow) at  $-45\text{ }^\circ\text{C}$ . After stirring for 30 min at this temperature, the reaction mixture was cooled to  $-78\text{ }^\circ\text{C}$  and added  $\text{BF}_3 \cdot \text{OEt}_2$  (565  $\mu\text{L}$ , 3.98 mmol, 2 eq.) in anhydrous  $\text{Et}_2\text{O}$  (11.1 mL). the resulting mixture was added compound **3** (1.00 g, 1.99 mmol, 1.0 eq.) (**3** were azeotropic with benzene three times.) in anhydrous  $\text{Et}_2\text{O}$  (22.1 mL) in 15 min. After stirring for 10 min, the reaction mixture was quenched by the addition of phosphorus buffer and extracted with  $\text{Et}_2\text{O}$  three times. The combined organic layer was washed with sat.  $\text{NH}_4\text{Cl}$  aq., water and brine, dried with anhydrous  $\text{MgSO}_4$ , filtered and concentrated in vacuo. Purification by silica gel chromatography (*n*-Hexane:  $\text{CH}_2\text{Cl}_2 = 2 : 1$  to *n*-Hexane:  $\text{EtOAc} = 30 : 1$ ) gave compound **2** in 83% yield (878 mg).

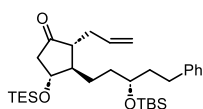

**Physical State:** yellow liquid

**$^1\text{H}$  NMR (400 MHz,  $\text{CDCl}_3$ )**  $\delta$  7.30-7.26 (m, 2H), 7.70-7.16 (m, 3H), 5.78-5.67 (m, 1H), 5.11-5.03 (m, 2H), 4.06 (q,  $J = 6.4$  Hz, 1H), 3.74-3.68 (m, 1H), 2.72-2.56 (m, 3H), 2.43-2.39 (m, 2H), 2.17 (dd,  $J = 6.0, 18.0$  Hz, 1H), 1.97-1.89 (m, 2H), 1.79-1.74 (m, 2H), 1.62-1.42 (m, 4H), 0.97-0.89 (m, 18H), 0.63-0.57 (m, 6H), 0.07-0.05 (6H, m)

**$^{13}\text{C}$  NMR (100 MHz,  $\text{CDCl}_3$ )**  $\delta$  217.2, 142.5, 135.6, 128.4 (2C), 128.3 (2C), 125.7, 117.1, 73.1, 72.0, 53.0, 48.9, 47.7, 39.0, 34.3, 33.8, 31.7, 27.8, 25.9 (3C), 18.1, 6.8 (3C), 4.8 (3C), -4.4 (2C)

**IR (neat)**  $\nu$  3060, 3028, 2956, 1742, 1641, 1603, 1496, 1458, 1415, 1377, 1264, 1097, 1006, 940, 918, 836, 775, 737

**HRMS (ESI):**  $[\text{M}+\text{Na}]^+$  calcd for  $\text{C}_{31}\text{H}_{54}\text{O}_3\text{Si}_2\text{Na}^+$ : 553.3504, found: 553.53521

$[\alpha]_{\text{D}}^{24}$  -31.0 ( $c$  0.44,  $\text{CHCl}_3$ )

**$R_f$**  (*n*-Hexane:  $\text{EtOAc} = 9 : 1$ , color reagent: *p*-anisaldehyde): 0.46

### Total synthesis of latanoprost

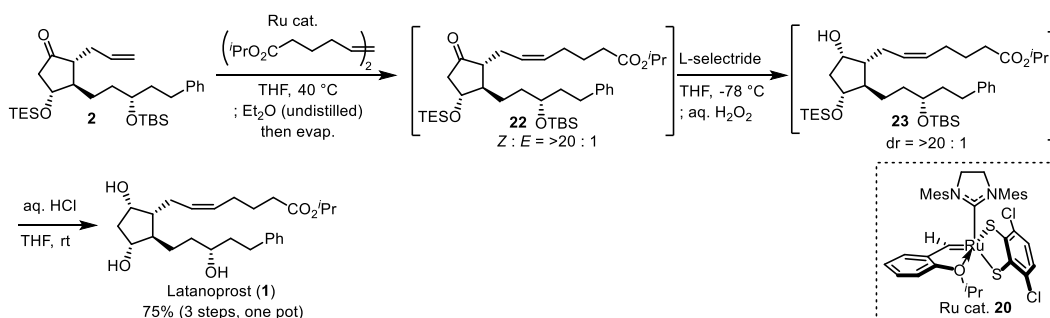

0.06 M THF solution of Ru cat. **20** was prepared according to the reported procedure.<sup>3)</sup>

A solution of compound **2** (9.8 mg, 18.5  $\mu\text{mol}$ ) and diester **21** (21.0 mg, 73.8  $\mu\text{mol}$ , 4 eq.) (**2** and **21** were azeotropic with benzene three times) and anhydrous THF (0.37 mL) was added to the Schrenk flask and freeze-pump-thaw for three times. Ru catalyst **20** (0.06 M in THF, 61.5  $\mu\text{L}$ , 3.69  $\mu\text{mol}$ , 20 mol%) was added at rt and reaction mixture was warmed to 40 °C. After stirring at 40 °C for 9.5 h, additional Ru catalyst **20** (0.06 M in THF, 61.5  $\mu\text{L}$ , 3.69  $\mu\text{mol}$ , 20 mol%) was added to the reaction mixture. After stirring reaction mixture at 40 °C for 13 h, undistilled Et<sub>2</sub>O (1 mL) was added to the mixture, then concentrated in vacuo. Remaining mixture was dissolved to anhydrous THF (0.37 mL) and cooled to -78 °C and L-selectride<sup>®</sup> (1 M in THF, 92.3  $\mu\text{L}$ , 92.3  $\mu\text{mol}$ , 5 eq.) was added slowly (over 5 min). After stirring this temperature for 30 min, H<sub>2</sub>O<sub>2</sub> (30% in H<sub>2</sub>O, 92.3  $\mu\text{L}$ ) was added to the mixture and warmed to room temperature. THF (0.37 mL) and 1M HCl aq. (0.37 mL, 20 eq.) were added and stirred at this temperature. After stirring for 22 h, the reaction mixture was quenched by the addition of phosphate buffer and extracted with EtOAc three times. The combined organic layer was washed with brine, dried with anhydrous Na<sub>2</sub>SO<sub>4</sub>, filtered and concentrated in vacuo. Purification by silica gel chromatography (*n*-Hexane: EtOAc = 1 : 1 to 1 : 3) gave latanoprost **1** in 75% yield (6.0 mg).

### Latanoprost

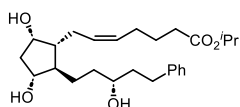

known compound

**Physical State:** pale yellow oil

**<sup>1</sup>H NMR (400 MHz, CDCl<sub>3</sub>)**  $\delta$  7.31–7.26 (m, 2H), 7.22–7.15 (m, 3H), 5.50–5.35 (m, 2H), 5.00 (sept,  $J$  = 6.4 Hz, 1H), 4.17 (br s, 1H), 3.94 (br s, 1H), 3.70–3.64 (m, 1H), 2.85–2.63 (m, 2H), 2.36–2.08 (m, 6H), 1.90–1.30, (m, 14H), 1.23 (d,  $J$  = 6.4 Hz, 6H)

**<sup>13</sup>C NMR (100 MHz, CDCl<sub>3</sub>)**  $\delta$  173.5, 142.0, 129.6, 129.3, 128.4 (4C), 125.8, 78.7, 74.9, 71.7, 67.7, 52.8, 52.0, 42.3, 39.3, 35.8, 34.0, 32.0, 30.3, 26.9, 26.6, 24.9, 21.8 (2C)

**HRMS (ESI):** [M+Na]<sup>+</sup> calcd for C<sub>26</sub>H<sub>40</sub>O<sub>5</sub>Na<sup>+</sup>: 455.2768, found: 455.2756

[ $\alpha$ ]<sub>D</sub><sup>26</sup> +30.8 (*c* 0.03, CH<sub>3</sub>CN), lit. [ $\alpha$ ]<sub>D</sub><sup>20</sup> +32.7 (*c* 1.03, MeCN)<sup>4</sup>

**R<sub>f</sub>** (*n*-Hexane: EtOAc = 1 : 3, color reagent: *p*-anisaldehyde): 0.26

## Reference

- 1) G. B. Kauffman, L. A. Teter, *Inorg. Synth.* **1963**, 7, 9.
- 2) A. P. Pulis, D. J. Blair, E. Torres and V. K. Aggarwal, *J. Am. Chem. Soc.* **2013**, 135, 16054.
- 3) D. S. Müller, I. Curbet, Y. Raoul, J. L. Nôtre, O. Baslé and M. Mauduit, *Org. Lett.*, **2018**, 20, 6822.
- 4) G. Zanoni, A. D'Alfonso, A. Porta, L. Feliciani, S. P. Nolan, G. Vidari, *Tetrahedron*, **2010**, 66, 7472.

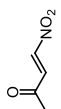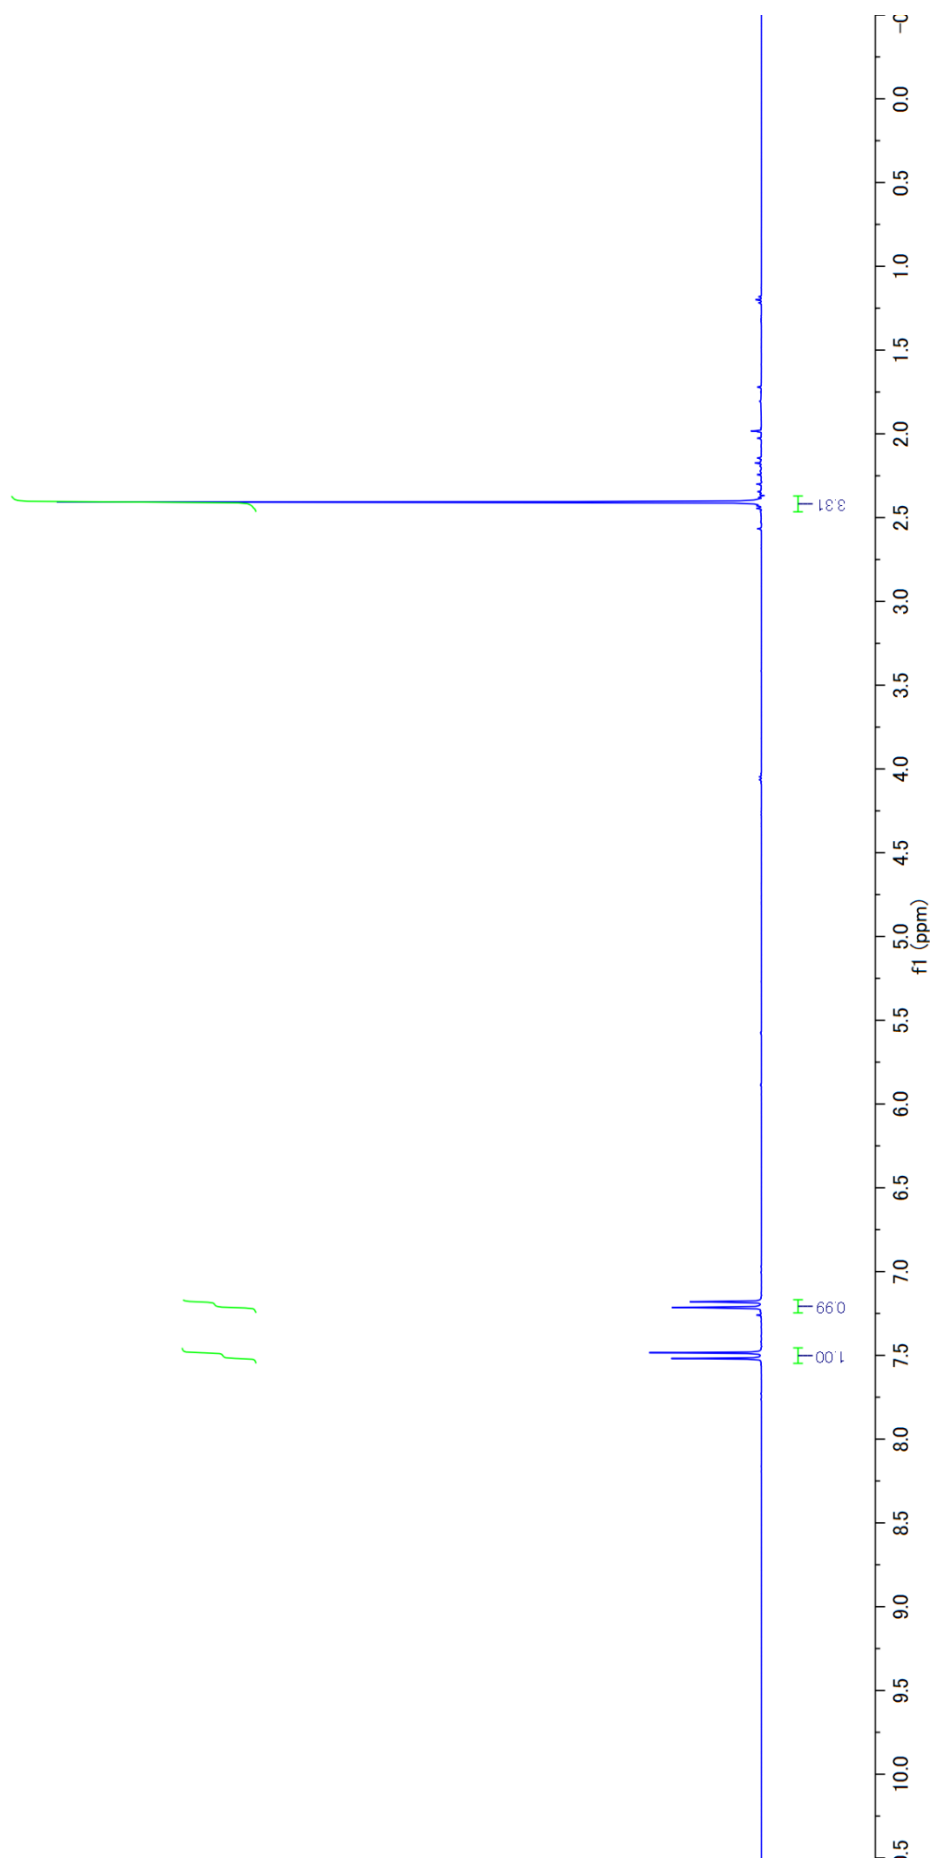

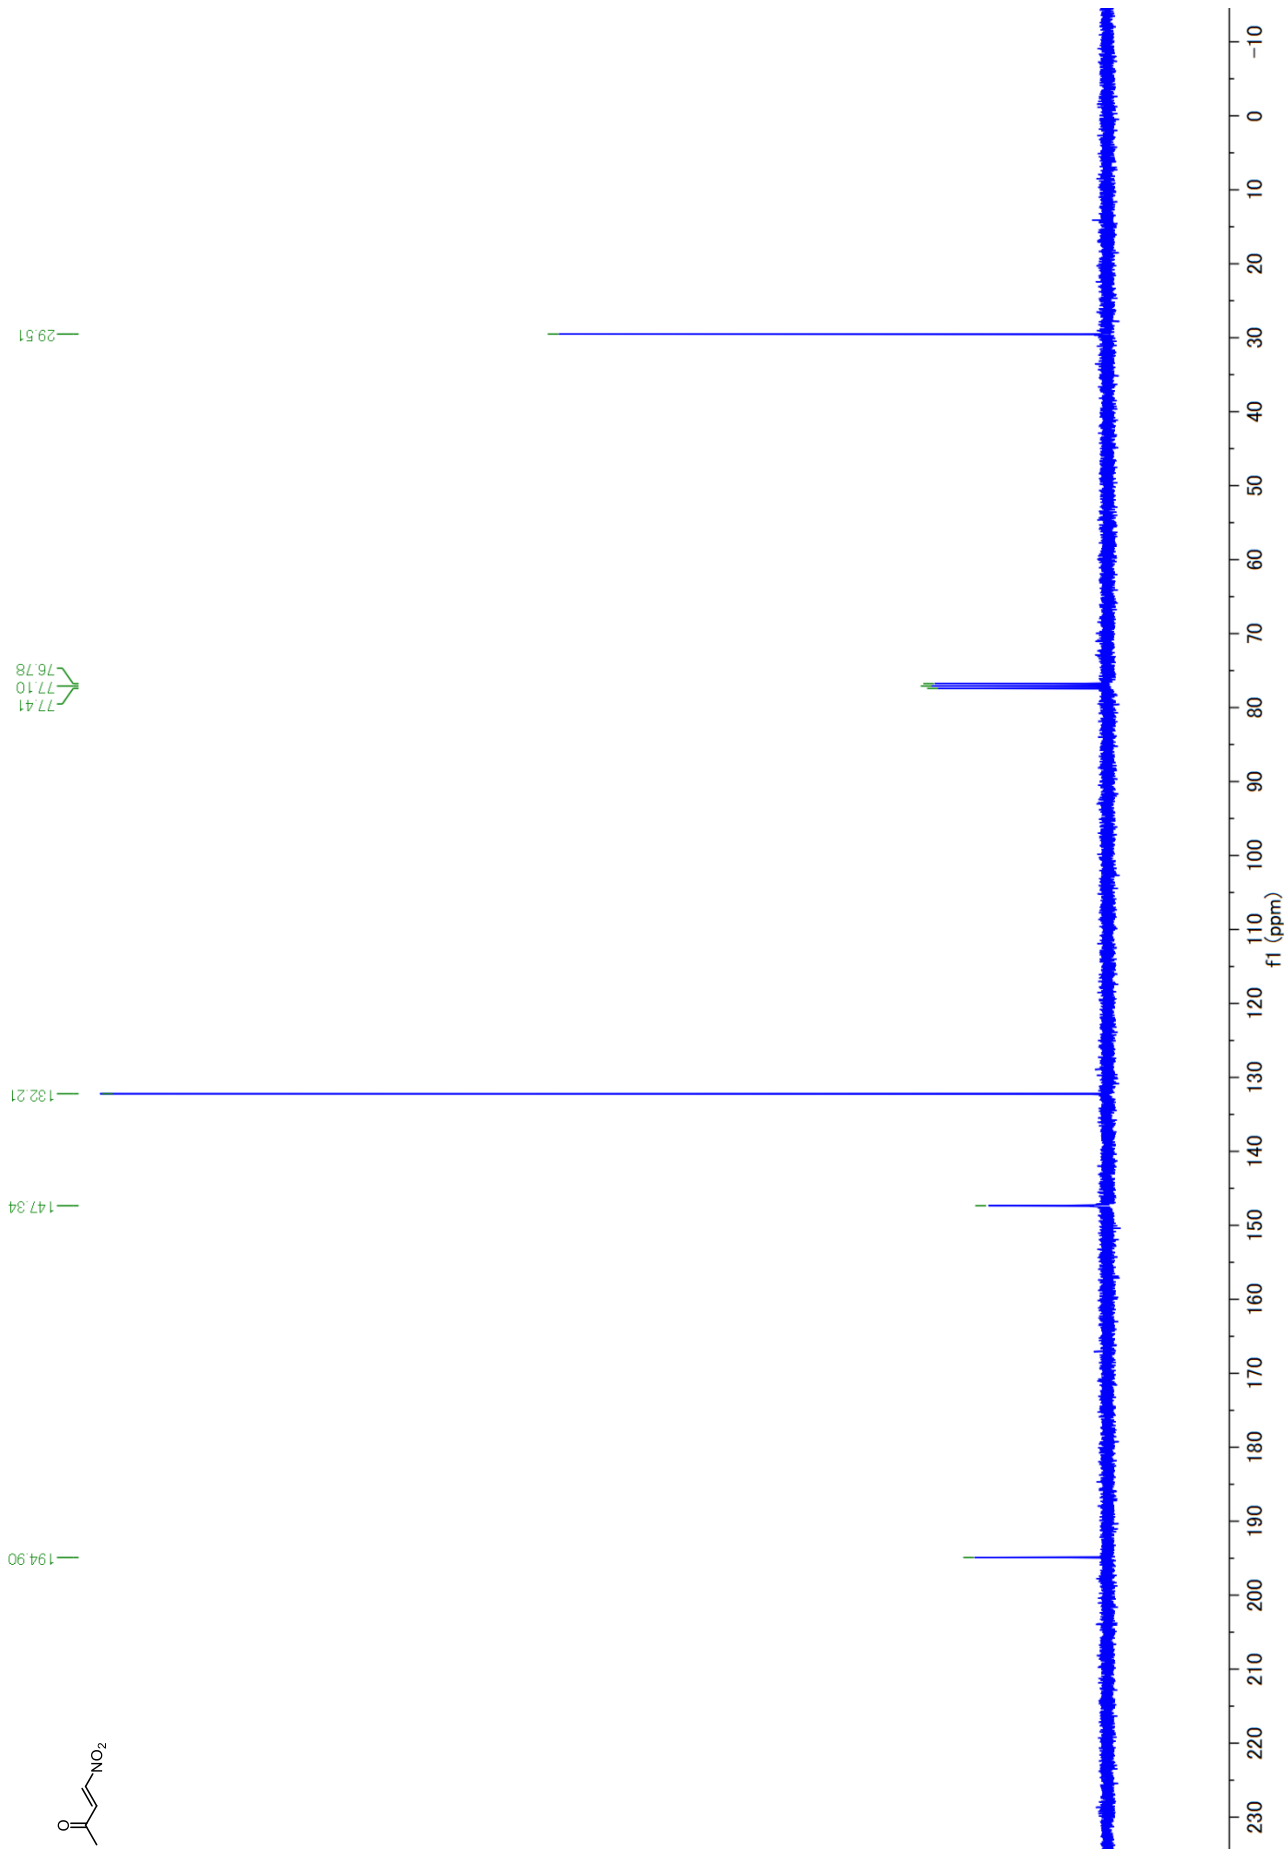

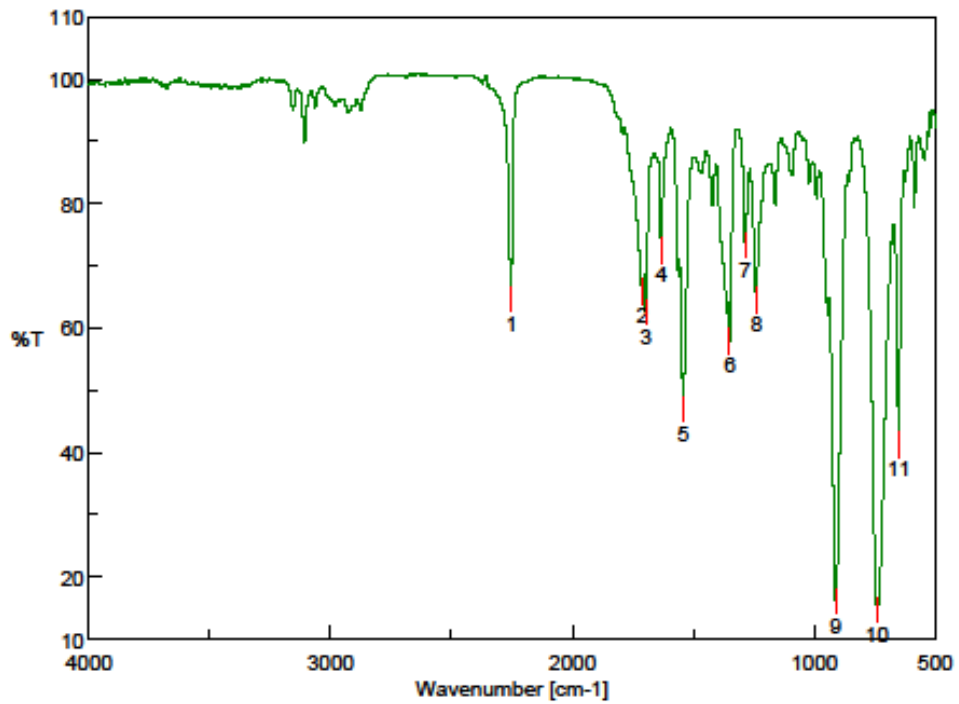

[ ピーク検出結果 ]

| No. | 位置      | 強度      | No. | 位置      | 強度      |
|-----|---------|---------|-----|---------|---------|
| 1   | 2254.38 | 64.5463 | 2   | 1710.55 | 65.7703 |
| 3   | 1697.05 | 62.607  | 4   | 1632.45 | 72.4557 |
| 5   | 1541.81 | 46.9146 | 6   | 1349.93 | 57.9499 |
| 7   | 1285.32 | 73.2492 | 8   | 1240    | 64.4148 |
| 9   | 912.165 | 16.0714 | 10  | 740.531 | 14.6305 |
| 11  | 650.858 | 41.1381 |     |         |         |

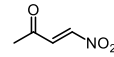



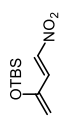

0.224  
0.223

0.975

4.879  
4.875  
4.830  
4.826

7.387  
7.365  
7.236  
7.204

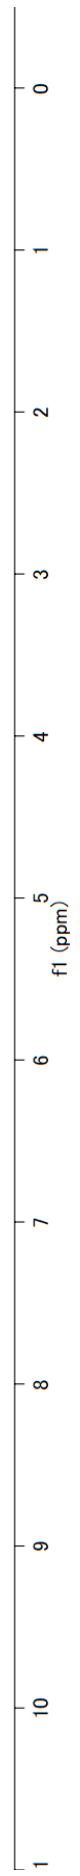

TBS-enol ether-nitroalkene-carbon

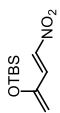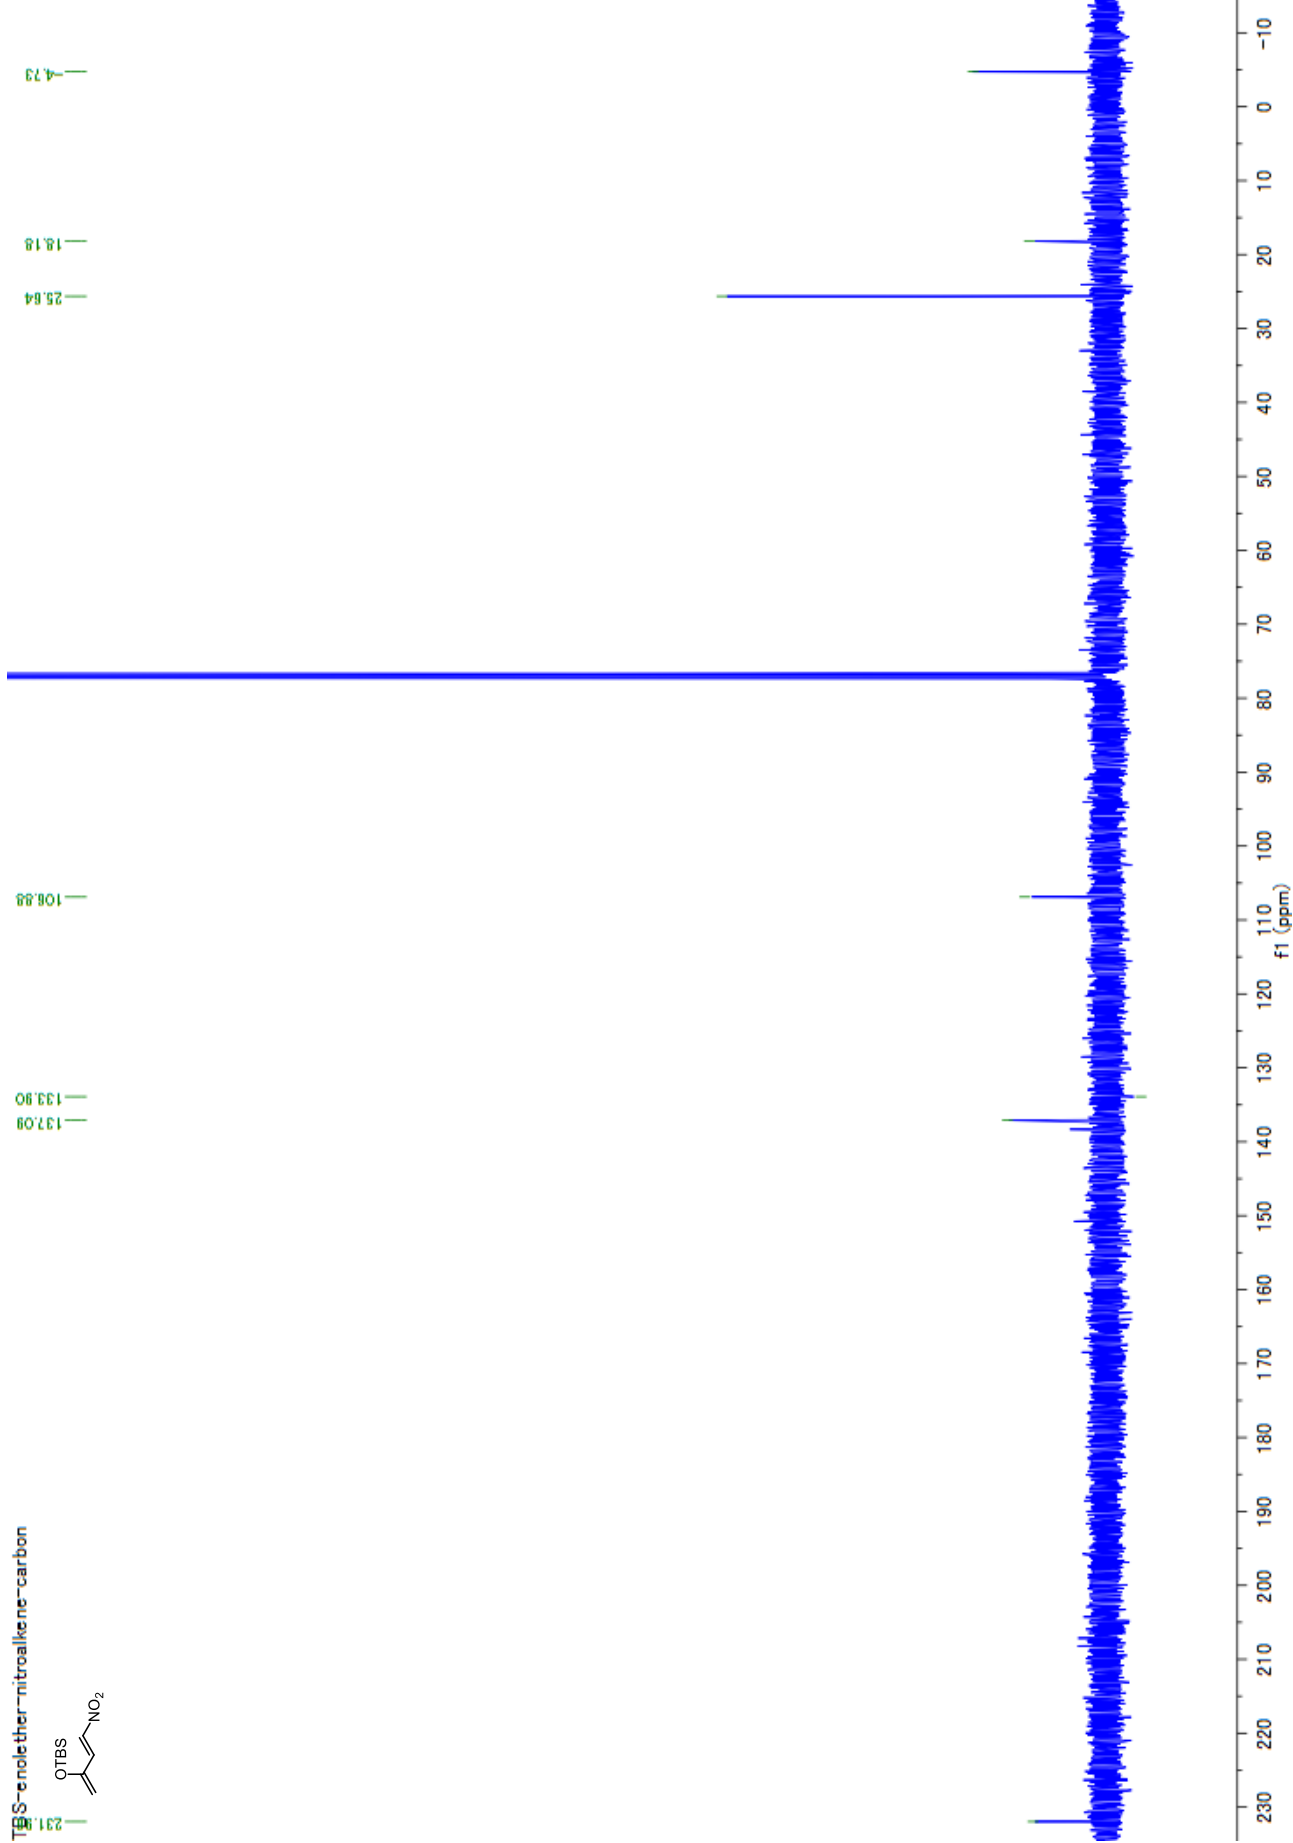

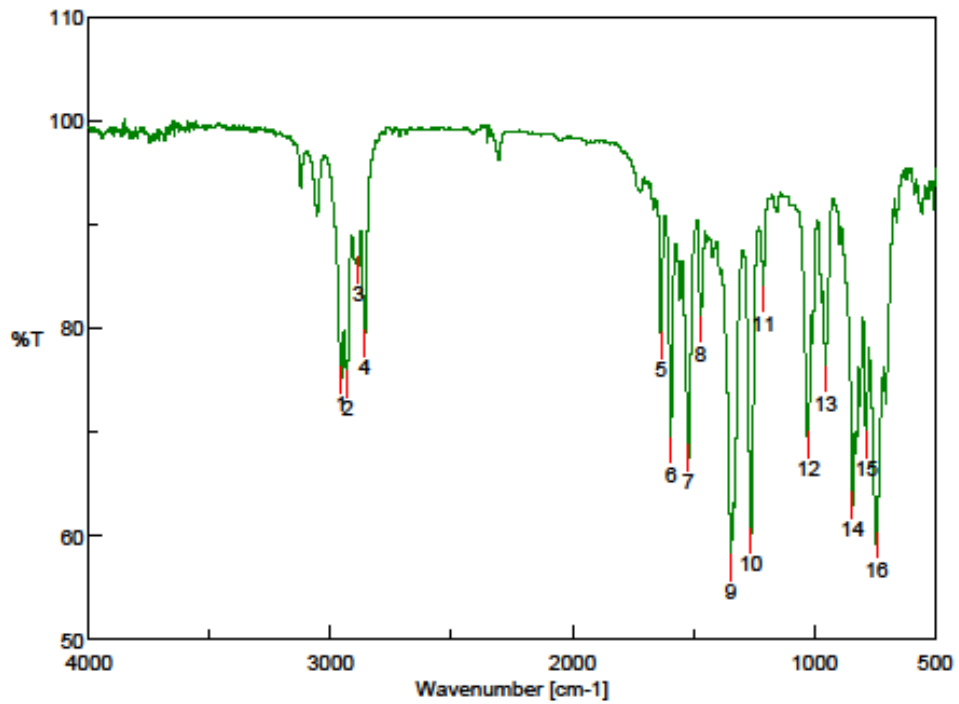

[ ピーク検出結果 ]

| No. | 位置      | 強度      | No. | 位置      | 強度      |
|-----|---------|---------|-----|---------|---------|
| 1   | 2957.3  | 74.9934 | 2   | 2932.23 | 74.5682 |
| 3   | 2886.92 | 85.6297 | 4   | 2859.92 | 78.4563 |
| 5   | 1633.41 | 78.2852 | 6   | 1593.88 | 68.2127 |
| 7   | 1519.63 | 67.4483 | 8   | 1472.38 | 79.8557 |
| 9   | 1345.11 | 56.8591 | 10  | 1263.15 | 59.5051 |
| 11  | 1211.08 | 82.792  | 12  | 1025.94 | 68.6782 |
| 13  | 953.627 | 75.0556 | 14  | 841.776 | 62.9122 |
| 15  | 784.886 | 68.6799 | 16  | 742.46  | 59.0273 |

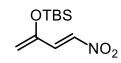

silylenol-nitroalkene-proton

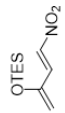

Toluene solution

1.02  
1.00  
0.98  
0.97  
0.78  
0.78  
0.76  
0.74

1.55

2.38

4.88  
4.88  
4.85  
4.83  
4.83

7.38  
7.35  
7.28  
7.28  
7.24  
7.19  
7.18  
7.17  
7.17  
7.17

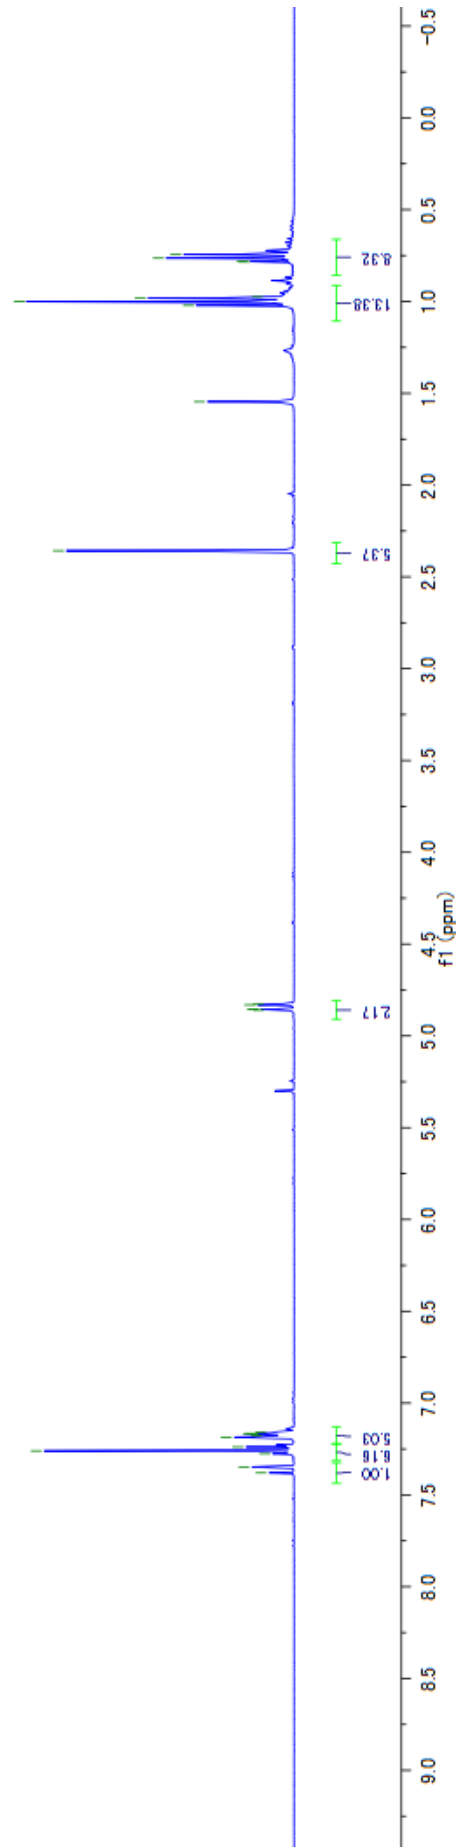

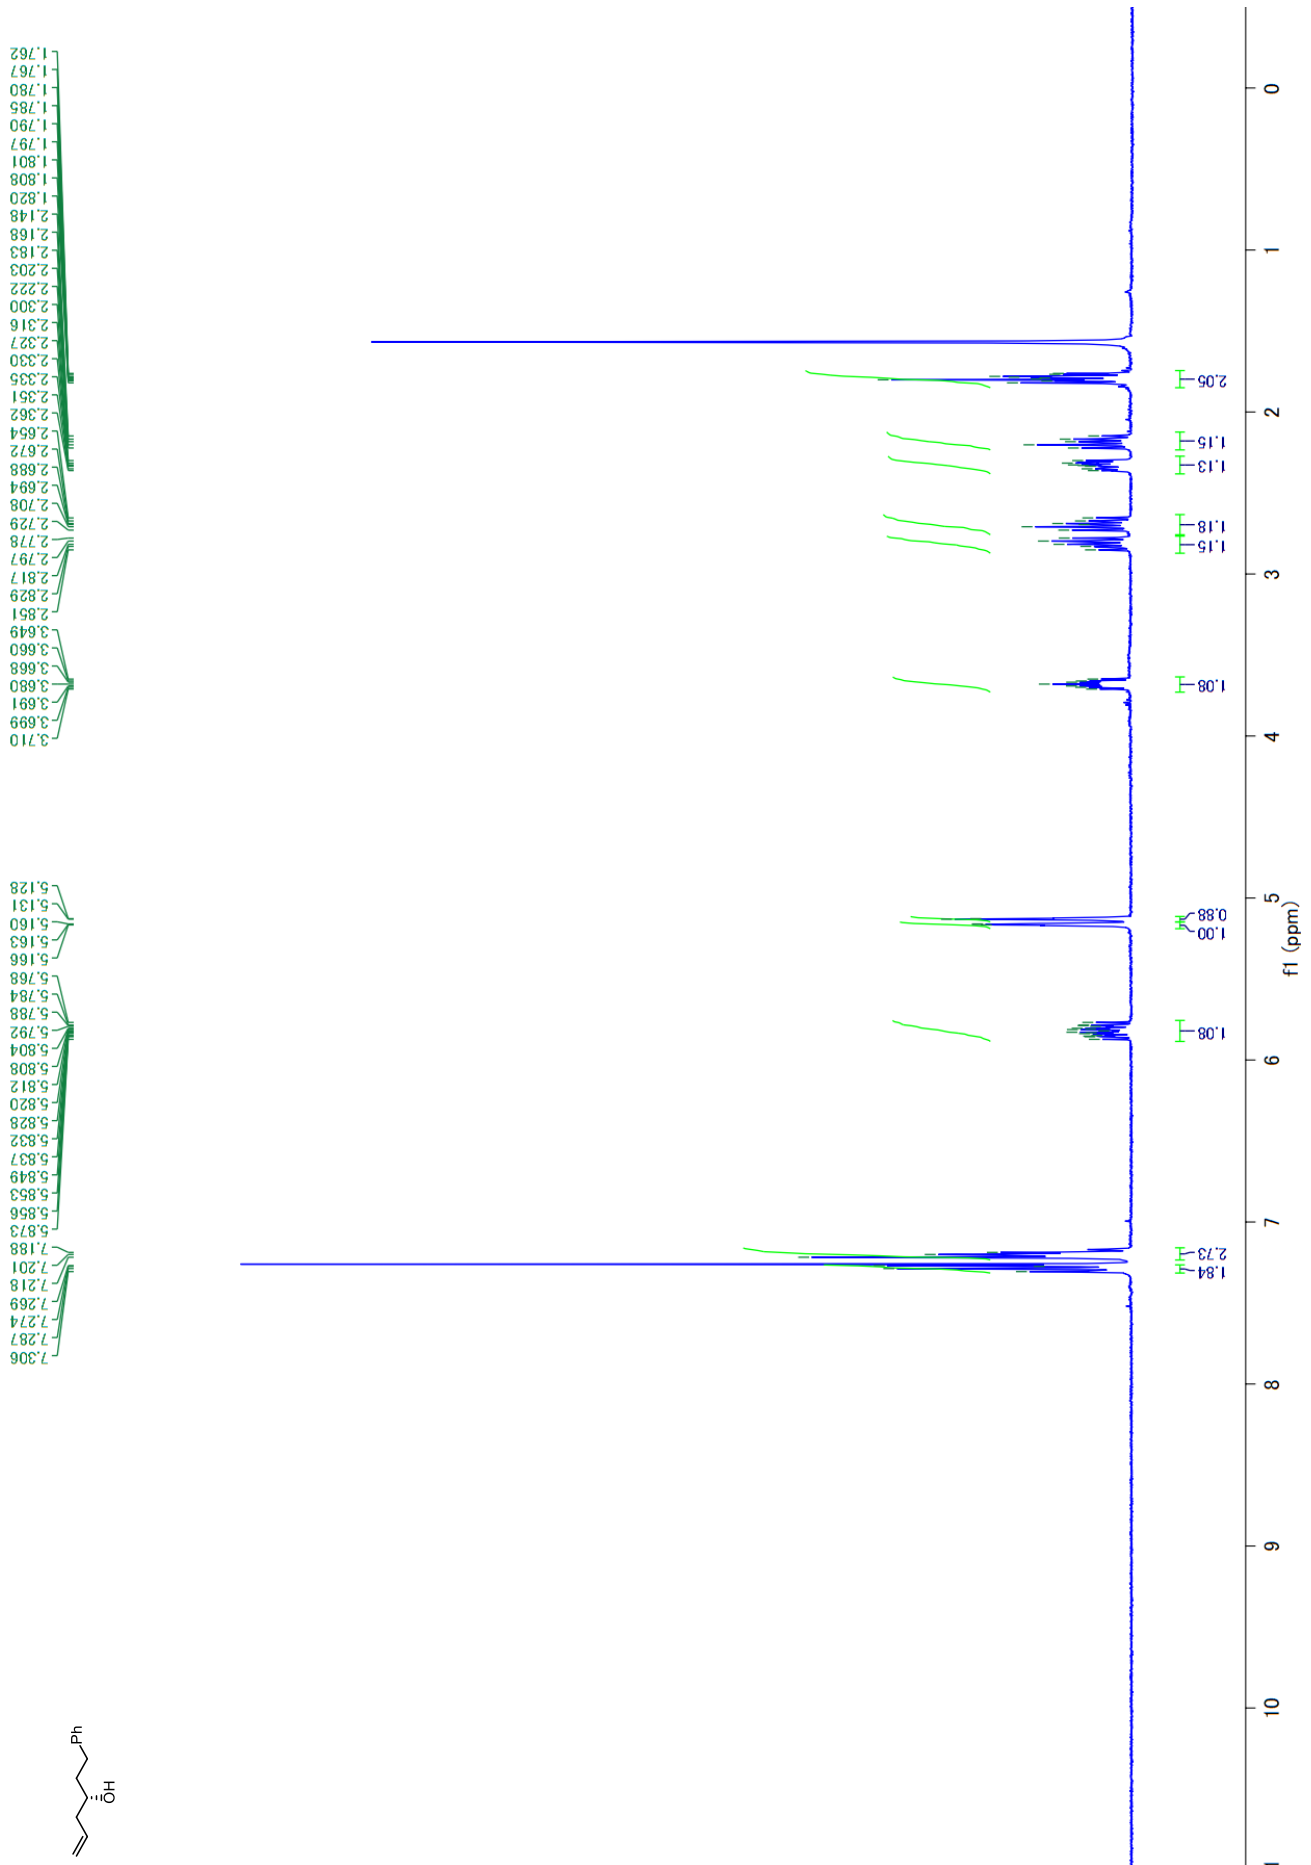

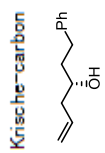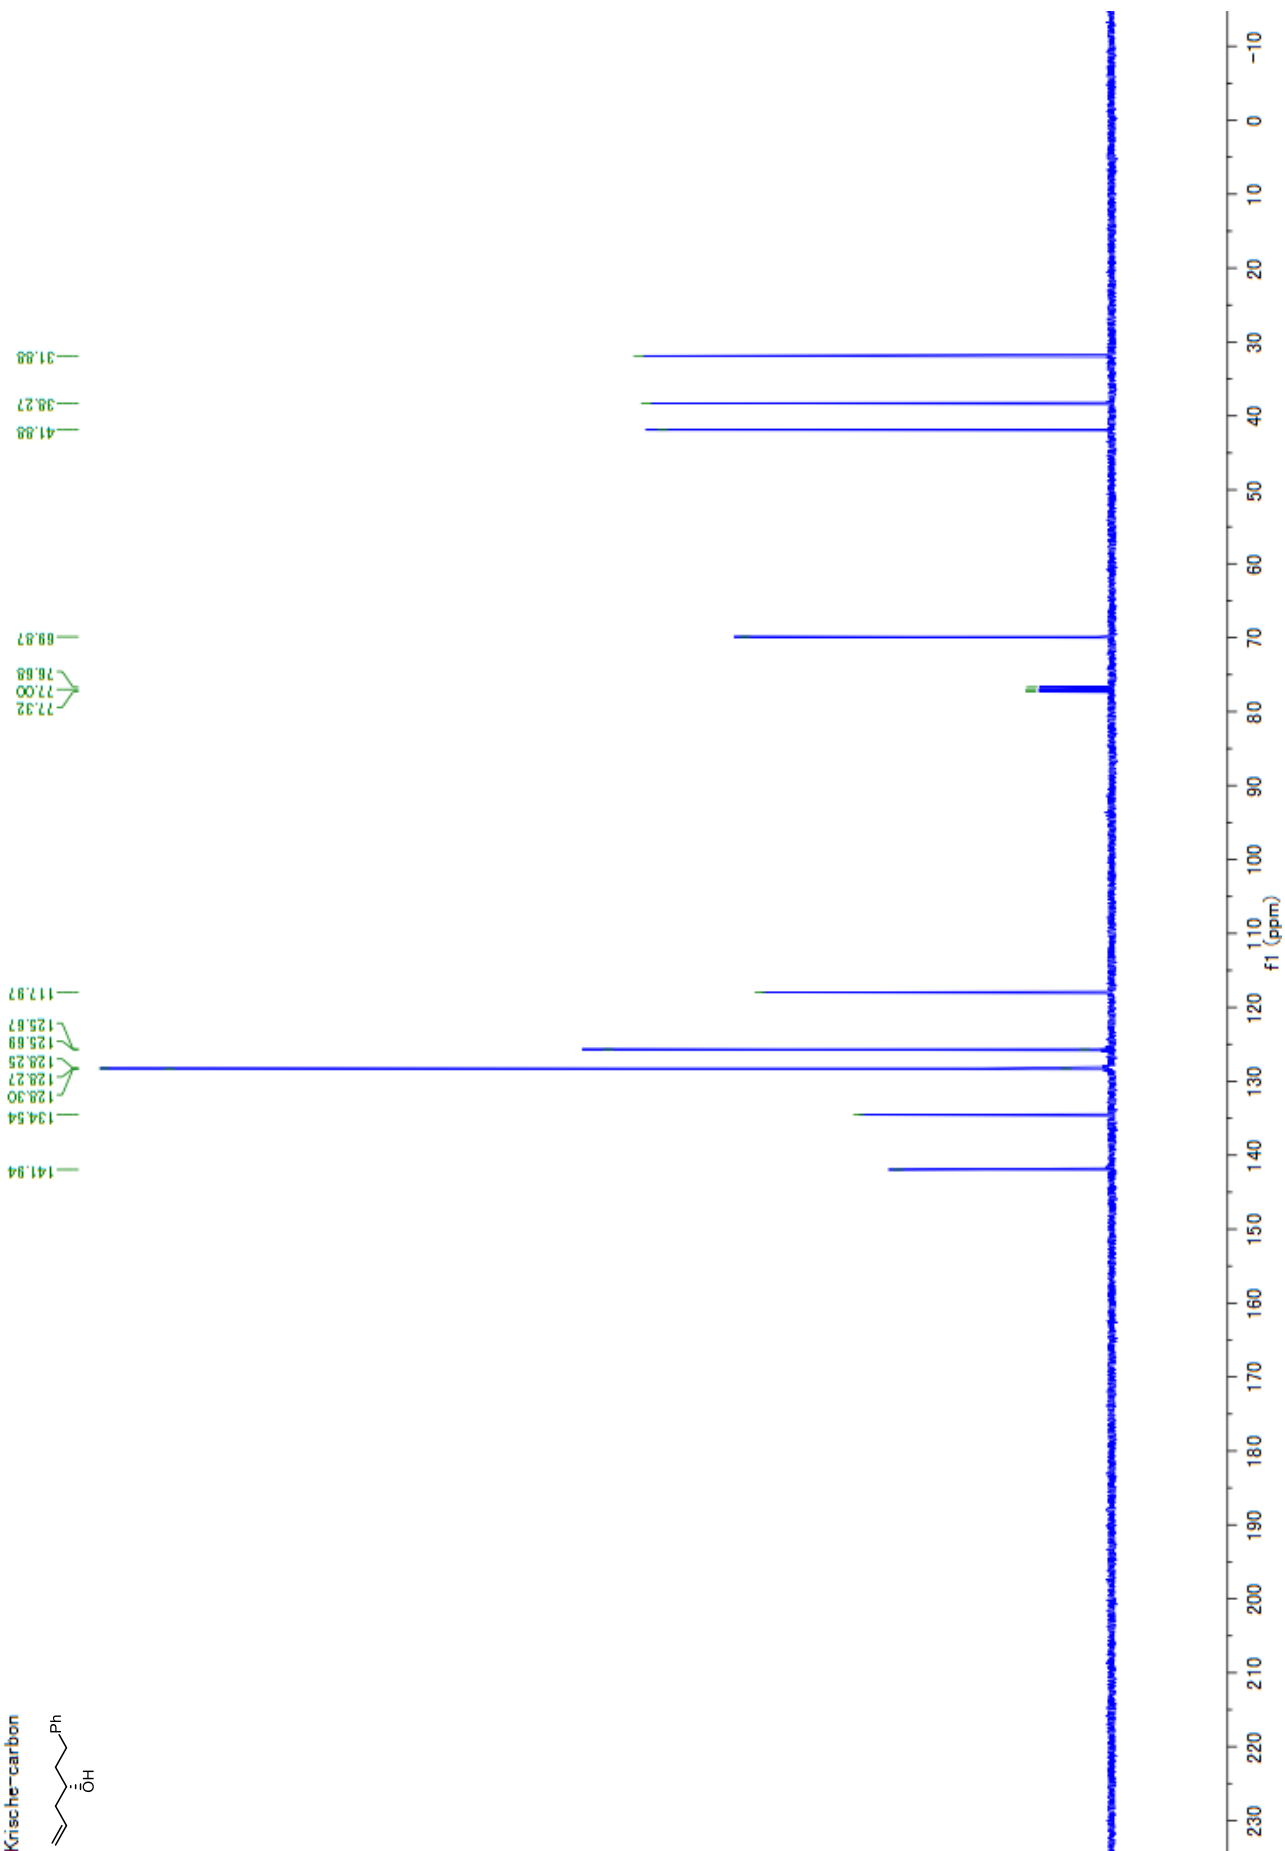

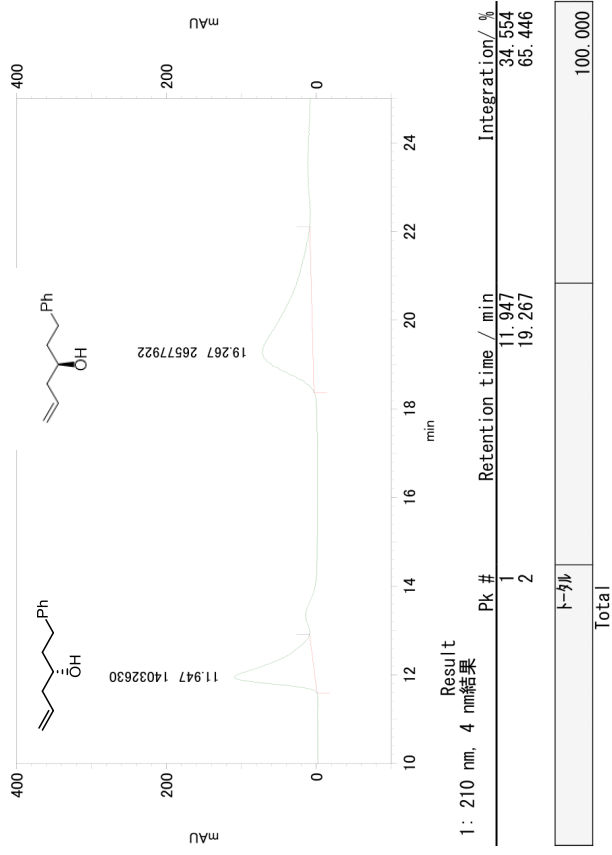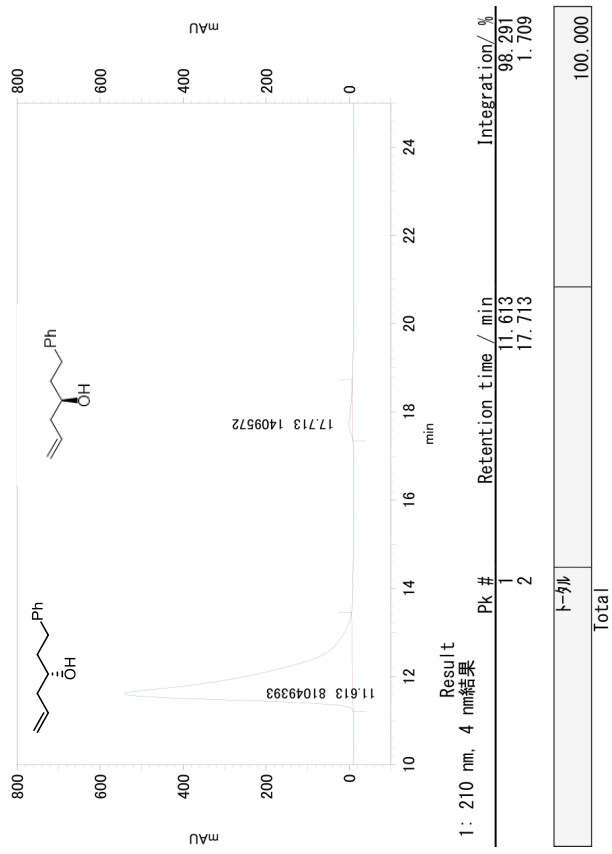

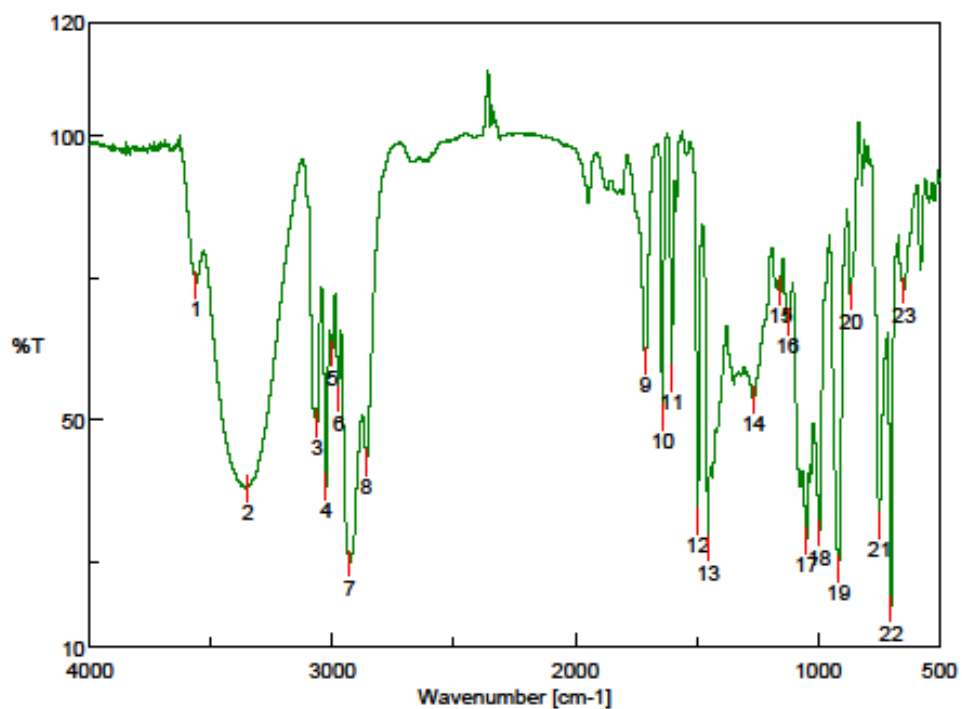

[ ピーク検出結果 ]

| No. | 位置      | 強度      | No. | 位置      | 強度      |
|-----|---------|---------|-----|---------|---------|
| 1   | 3563.81 | 73.7693 | 2   | 3351.68 | 37.8263 |
| 3   | 3063.37 | 49.3237 | 4   | 3026.73 | 38.2094 |
| 5   | 3002.62 | 61.6704 | 6   | 2976.59 | 53.6172 |
| 7   | 2930.31 | 24.7289 | 8   | 2860.88 | 42.4297 |
| 9   | 1711.51 | 60.3626 | 10  | 1641.13 | 50.5014 |
| 11  | 1602.56 | 57.3764 | 12  | 1495.53 | 32.2052 |
| 13  | 1454.06 | 27.3404 | 14  | 1266.04 | 53.4044 |
| 15  | 1154.19 | 72.5597 | 16  | 1126.22 | 67.2882 |
| 17  | 1048.12 | 28.6954 | 18  | 995.089 | 29.9777 |
| 19  | 916.022 | 23.6867 | 20  | 864.917 | 71.6667 |
| 21  | 747.281 | 31.3747 | 22  | 700.034 | 16.715  |
| 23  | 646.036 | 72.8173 |     |         |         |

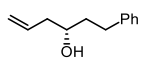



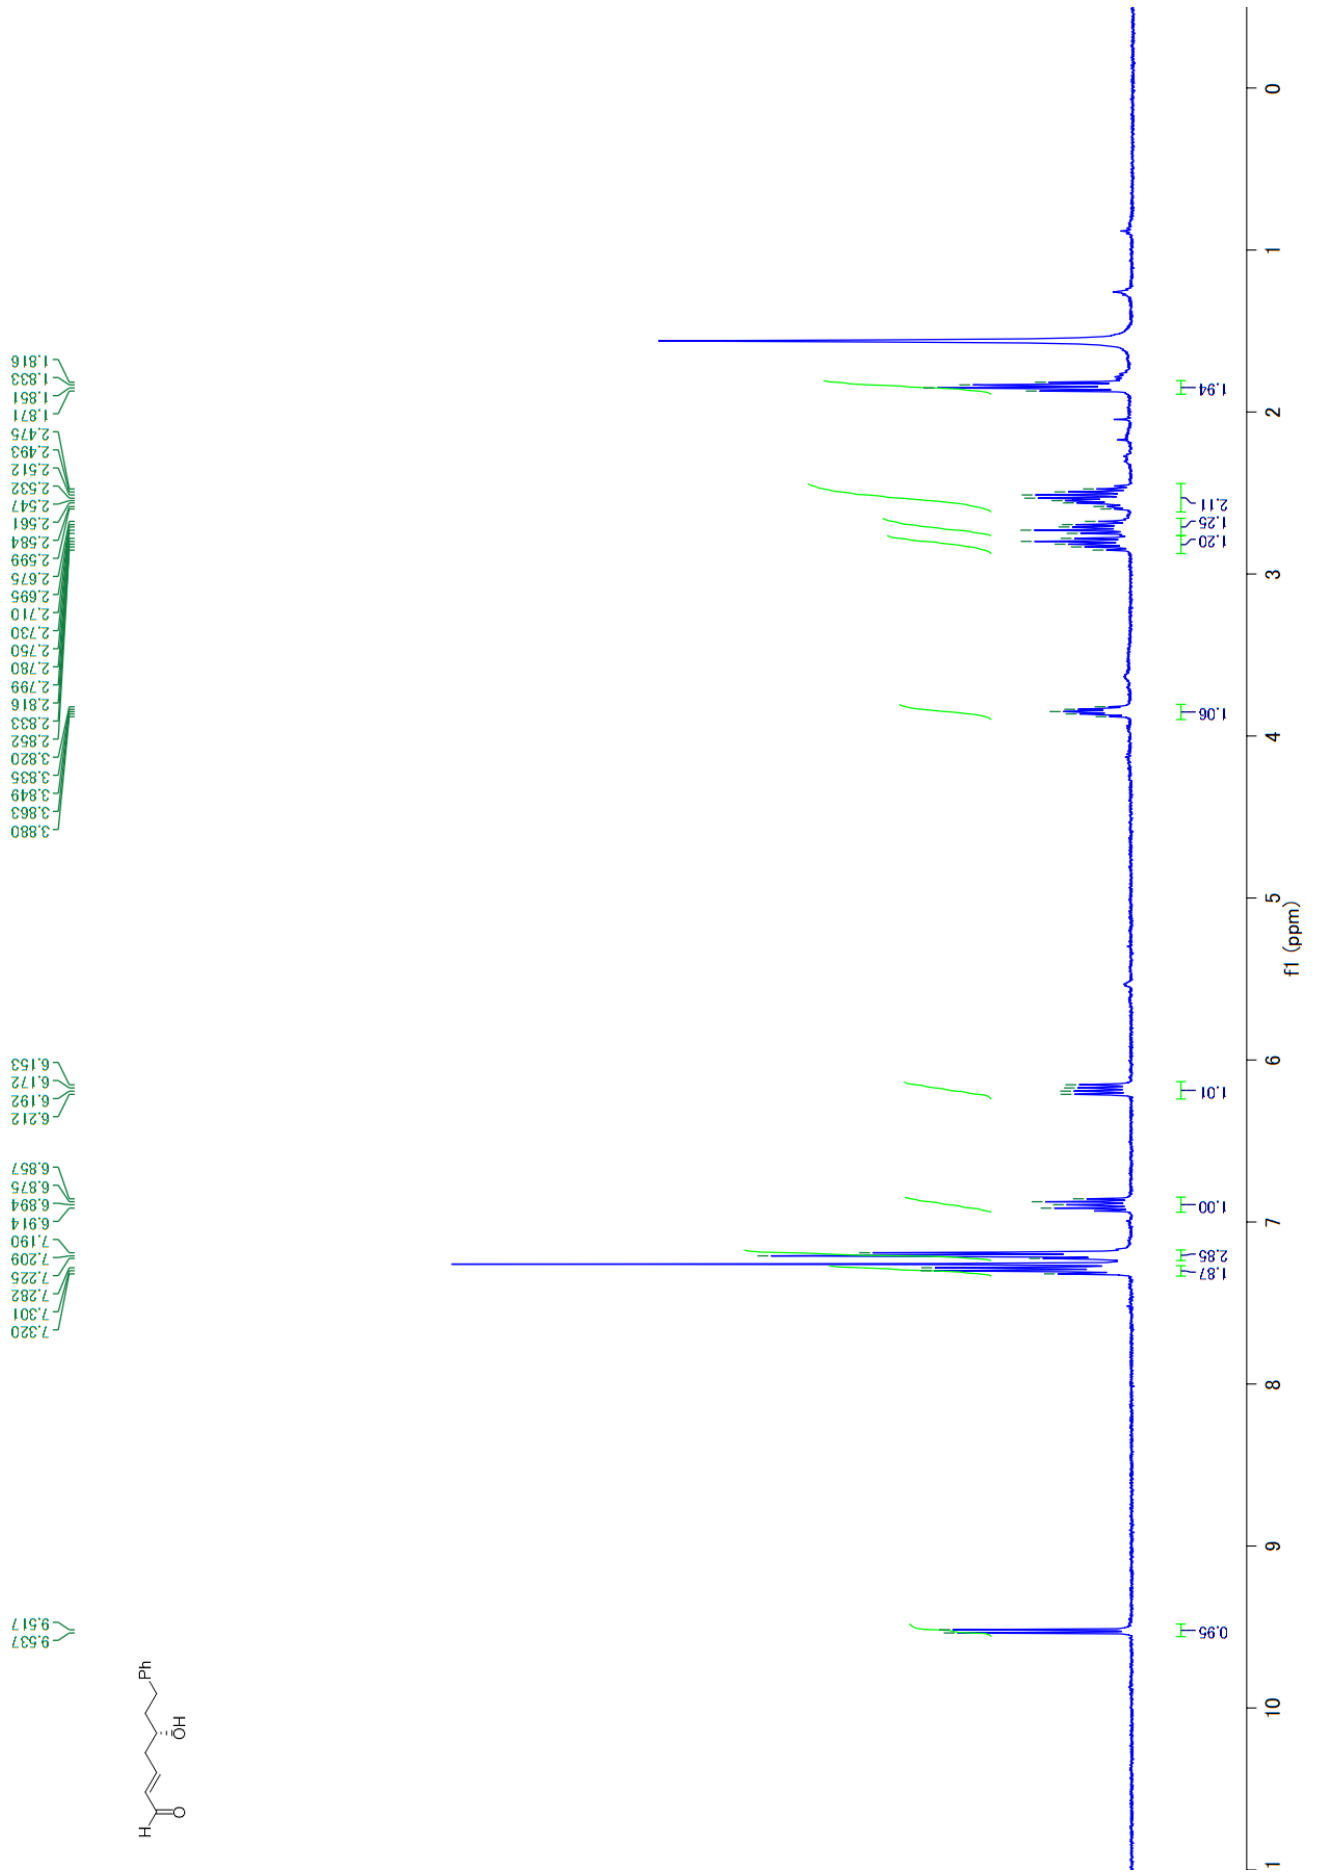

metathesis-acrolein\_carbon

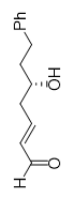

31.80  
40.55  
38.78

69.61  
77.32  
77.00  
76.88

125.97  
128.44  
128.29

134.78  
141.31  
154.75

193.94

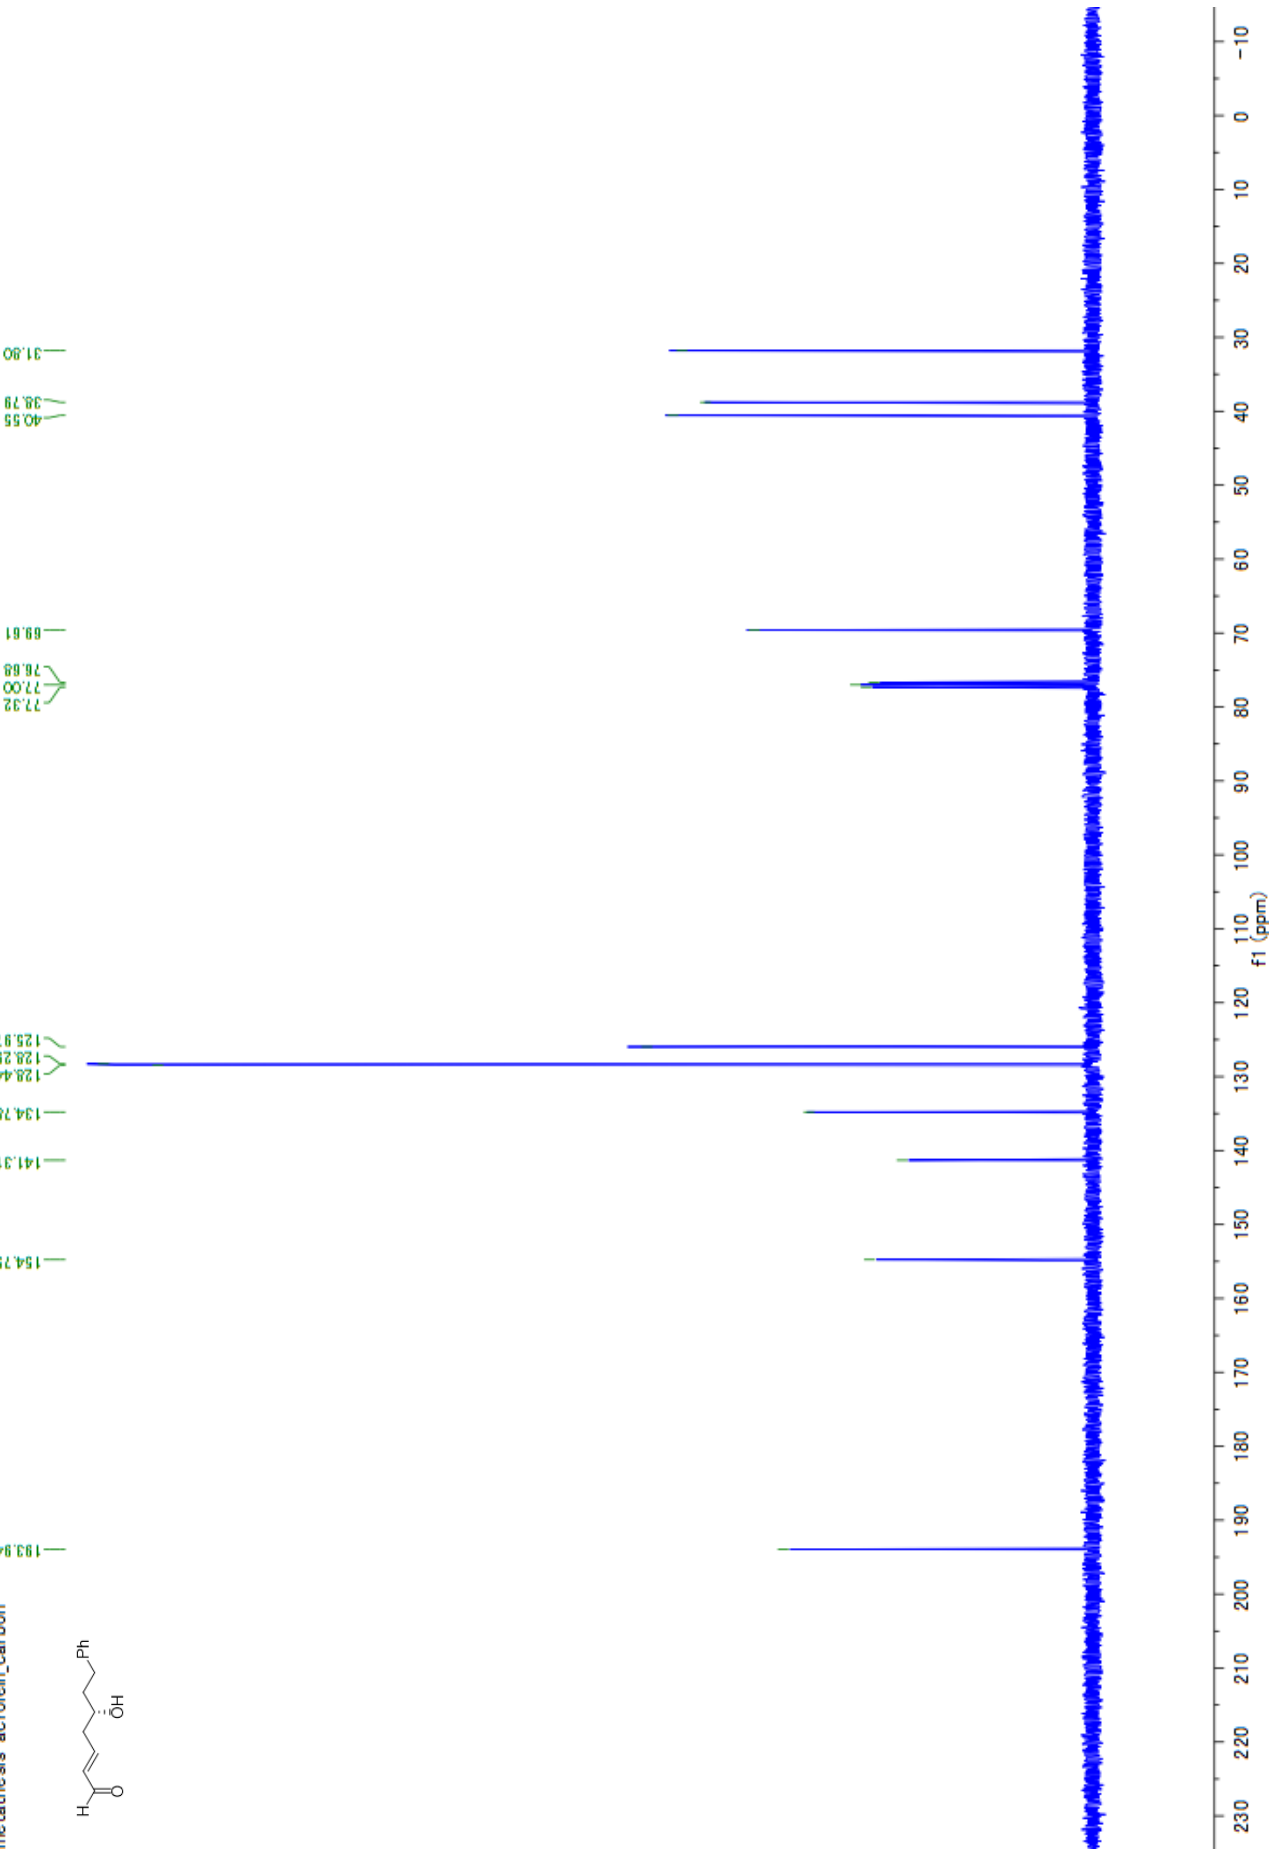

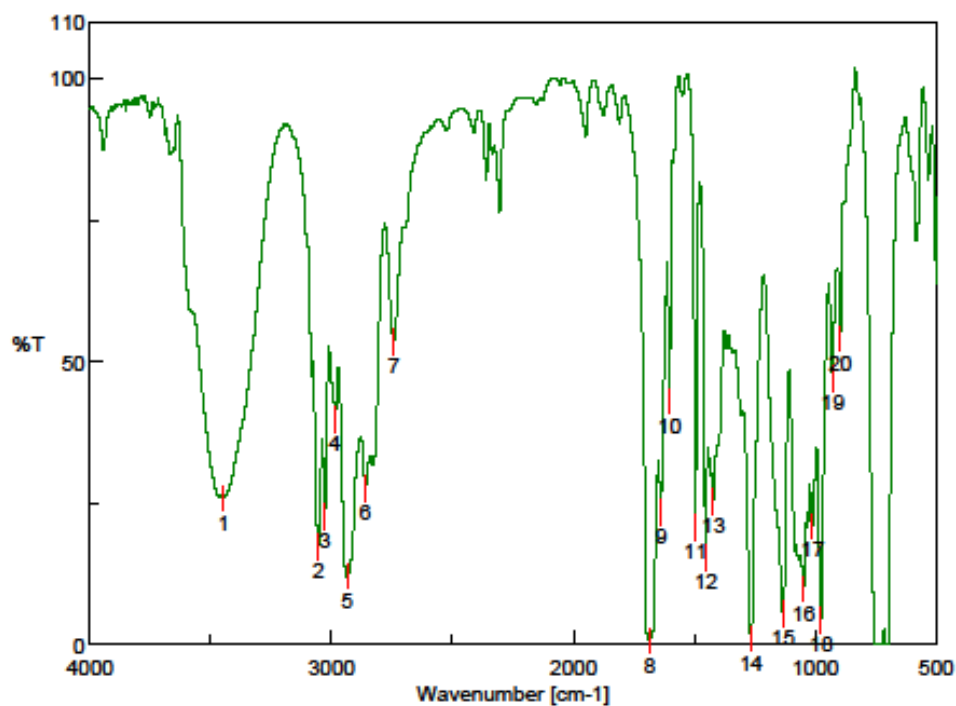

[ ピーク検出結果 ]

| No. | 位置      | 強度      | No. | 位置      | 強度       |
|-----|---------|---------|-----|---------|----------|
| 1   | 3447.13 | 25.7086 | 2   | 3055.66 | 17.1215  |
| 3   | 3028.66 | 22.4544 | 4   | 2986.23 | 39.6233  |
| 5   | 2936.09 | 11.9679 | 6   | 2860.88 | 27.5279  |
| 7   | 2744.21 | 53.4862 | 8   | 1684.52 | 0.623924 |
| 9   | 1638.23 | 23.3397 | 10  | 1602.56 | 42.9173  |
| 11  | 1495.53 | 20.5119 | 12  | 1454.06 | 15.2369  |
| 13  | 1421.28 | 25.2412 | 14  | 1266.04 | 1.00845  |
| 15  | 1133.94 | 5.33556 | 16  | 1049.09 | 9.78159  |
| 17  | 1011.48 | 20.8949 | 18  | 975.804 | 4.17893  |
| 19  | 928.557 | 46.8865 | 20  | 896.737 | 53.9582  |
| 21  | 698.105 | 0       |     |         |          |

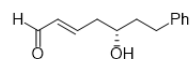

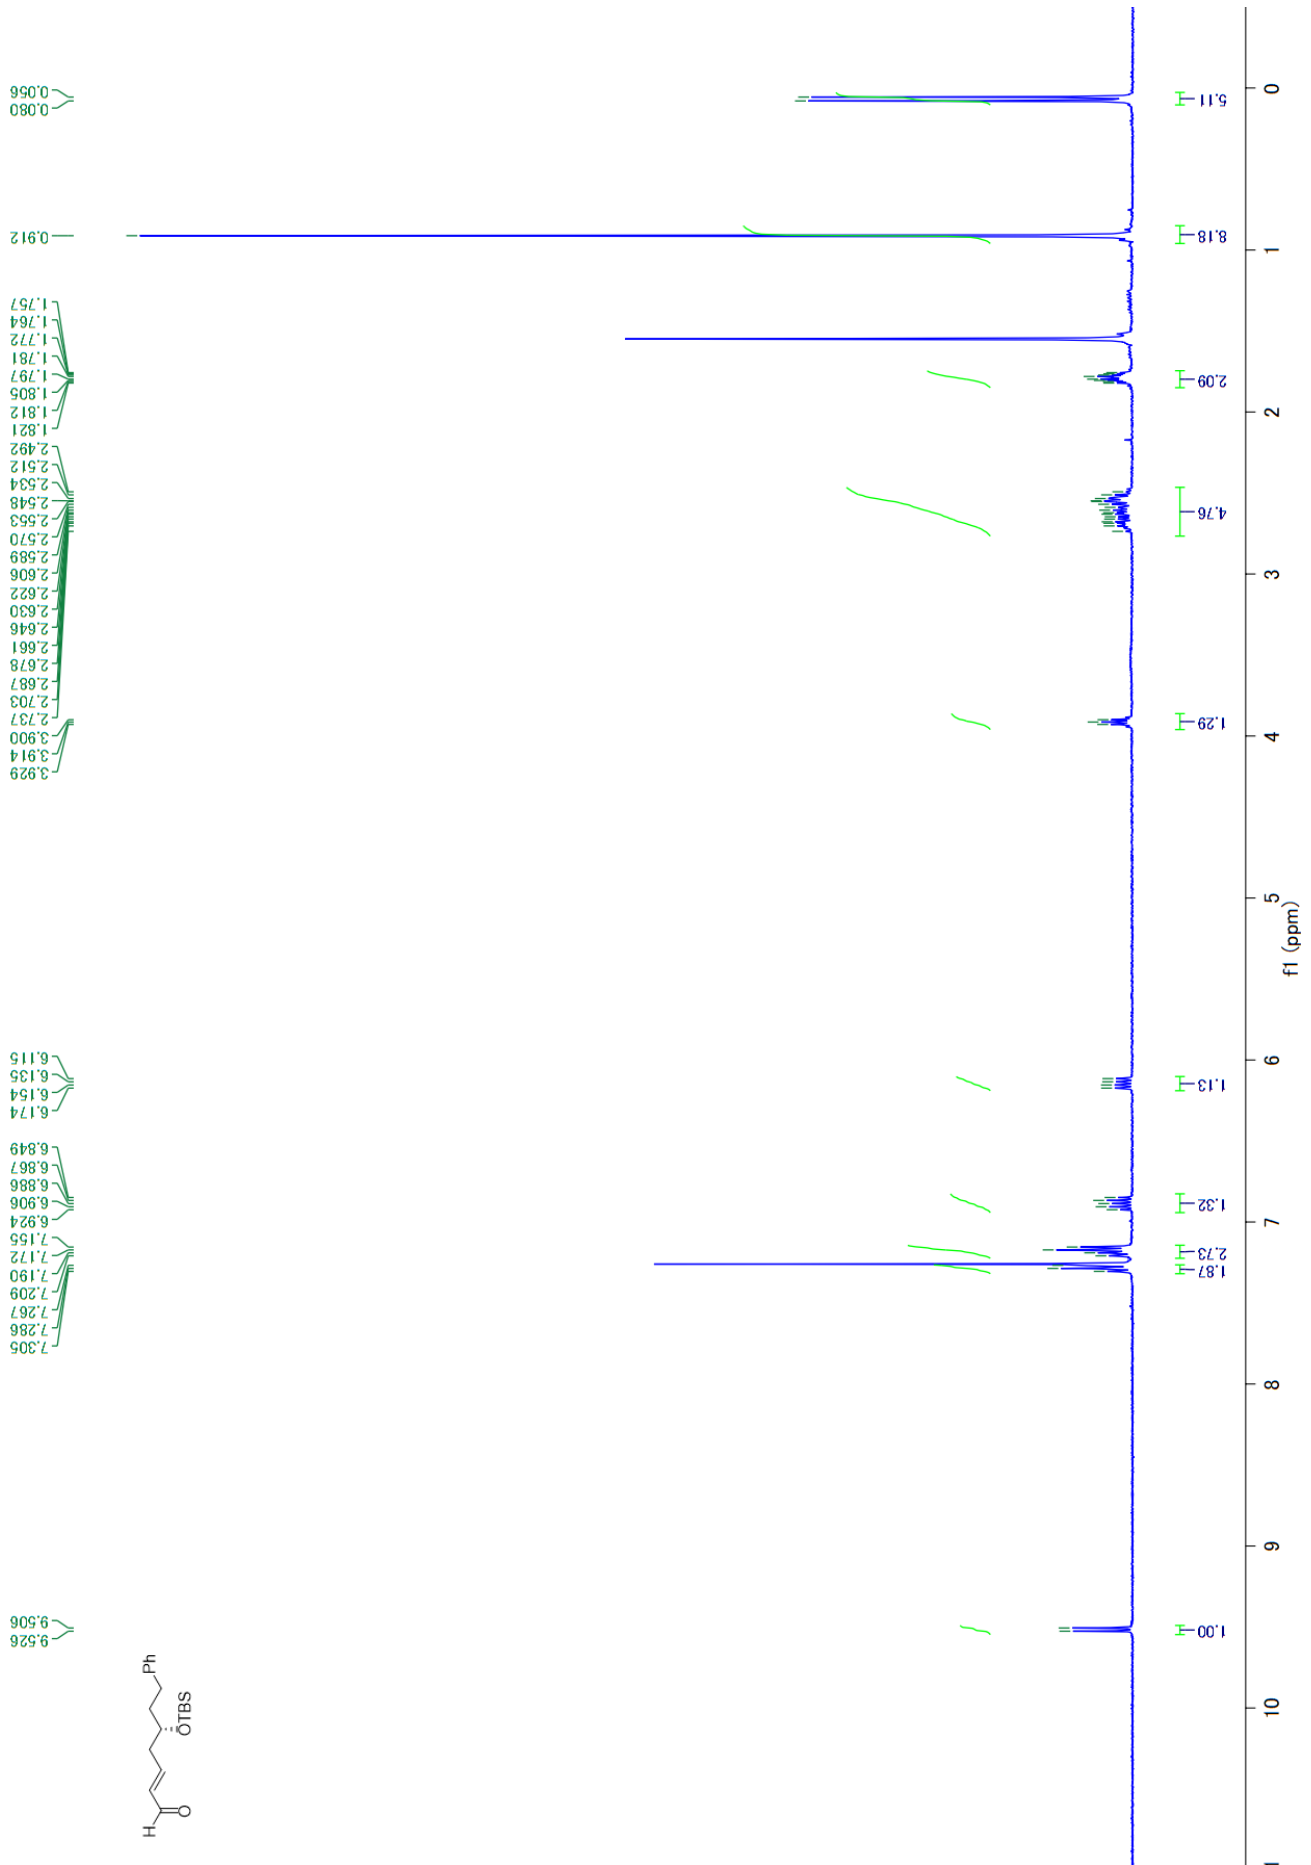

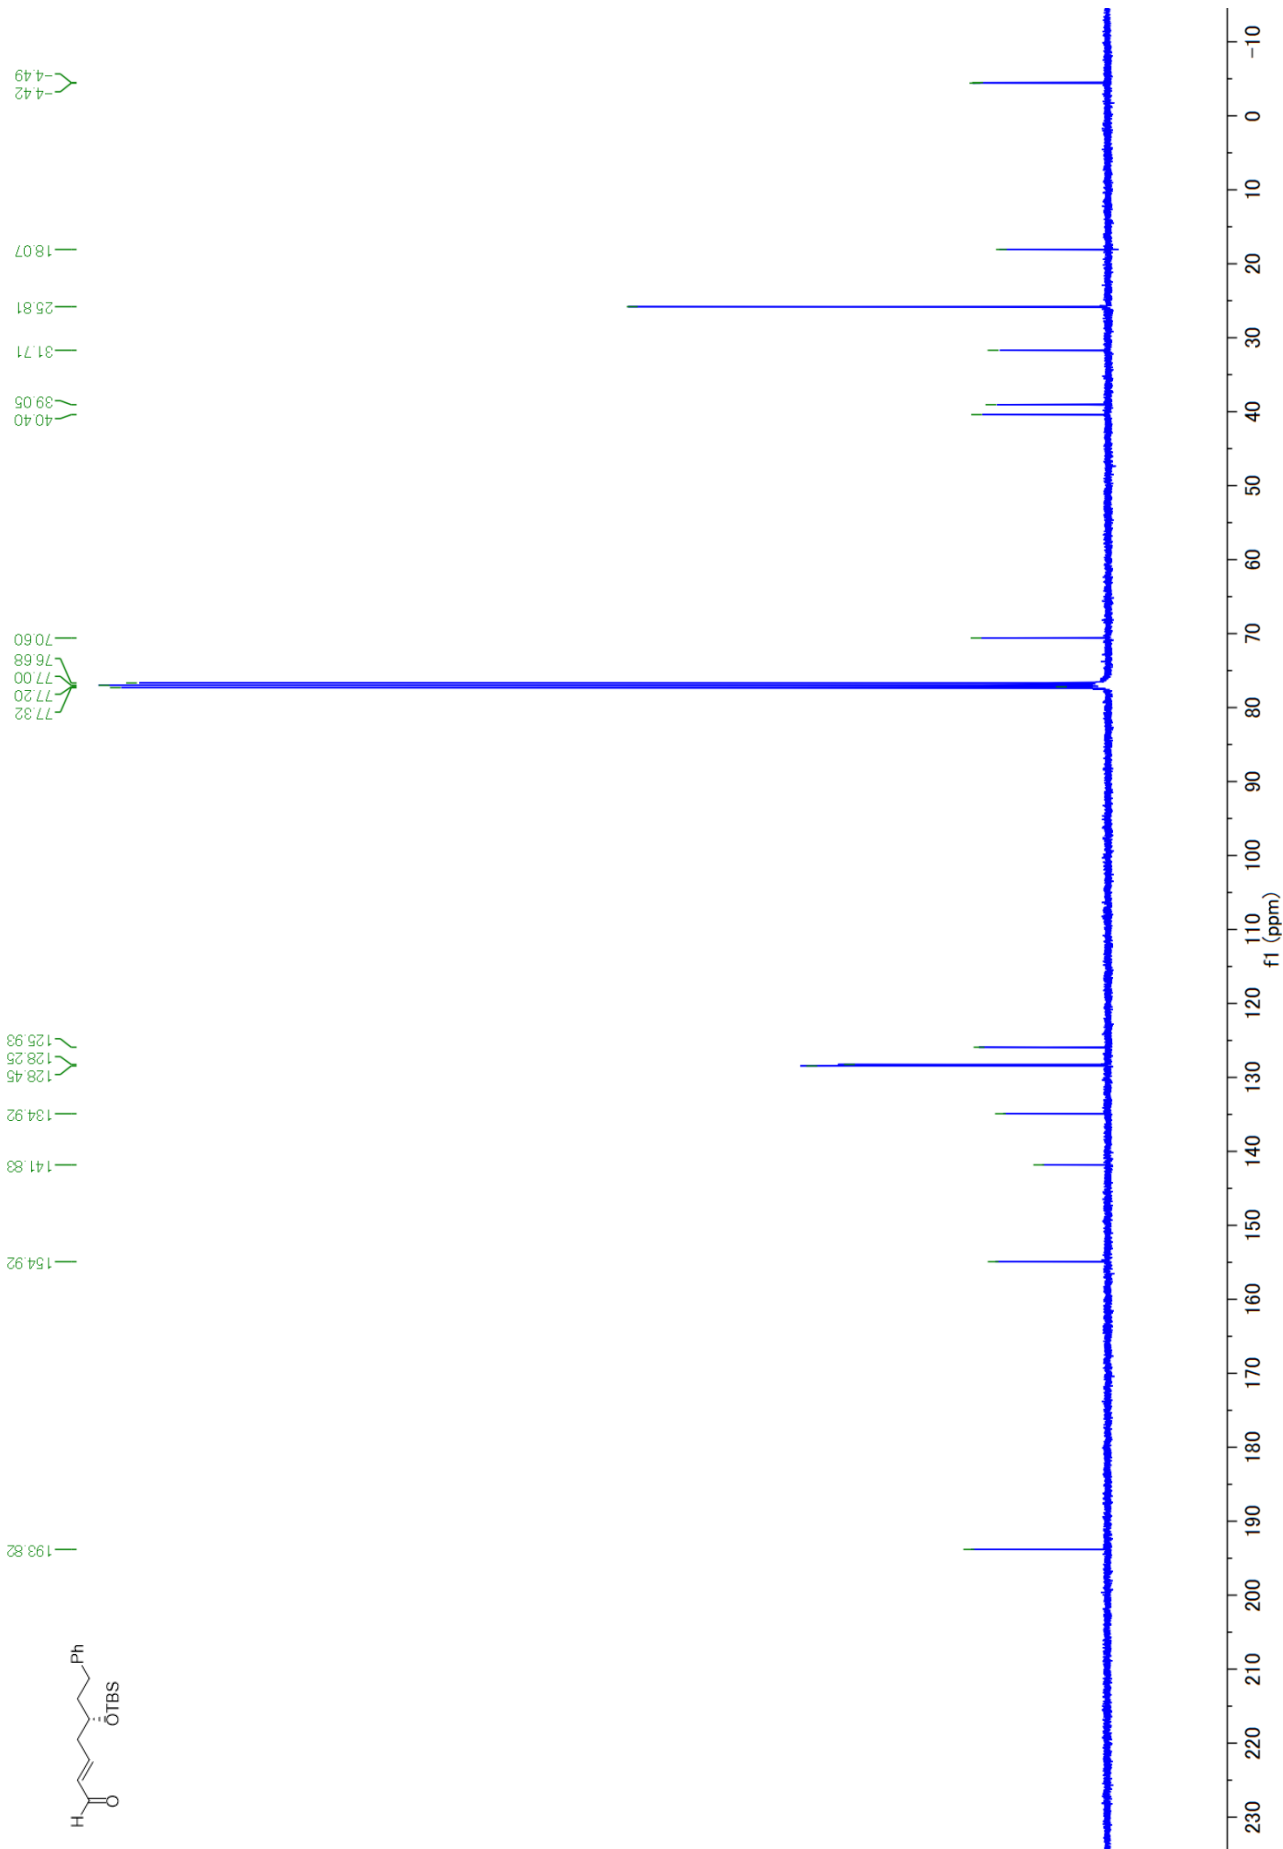

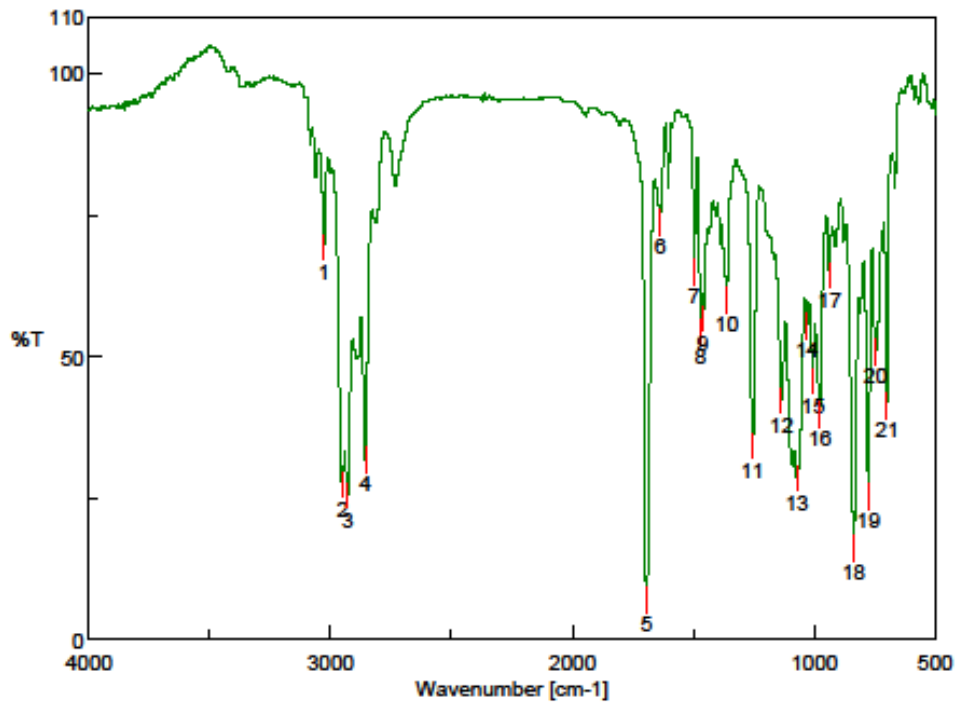

[ ピーク検出結果 ]

| No. | 位置      | 強度      | No. | 位置      | 強度      |
|-----|---------|---------|-----|---------|---------|
| 1   | 3027.69 | 69.1925 | 2   | 2952.48 | 27.1838 |
| 3   | 2929.34 | 25.3321 | 4   | 2857.02 | 31.5927 |
| 5   | 1694.16 | 6.96263 | 6   | 1638.23 | 73.6879 |
| 7   | 1496.49 | 64.9111 | 8   | 1472.38 | 54.1699 |
| 9   | 1461.78 | 56.6433 | 10  | 1361.5  | 59.8246 |
| 11  | 1256.4  | 34.1983 | 12  | 1136.83 | 42.1384 |
| 13  | 1072.23 | 28.4041 | 14  | 1030.77 | 55.3496 |
| 15  | 1006.66 | 45.4907 | 16  | 977.733 | 39.6103 |
| 17  | 938.199 | 64.311  | 18  | 836.955 | 16.0342 |
| 19  | 776.208 | 25.2536 | 20  | 747.281 | 50.7213 |
| 21  | 700.034 | 41.2974 |     |         |         |

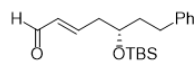

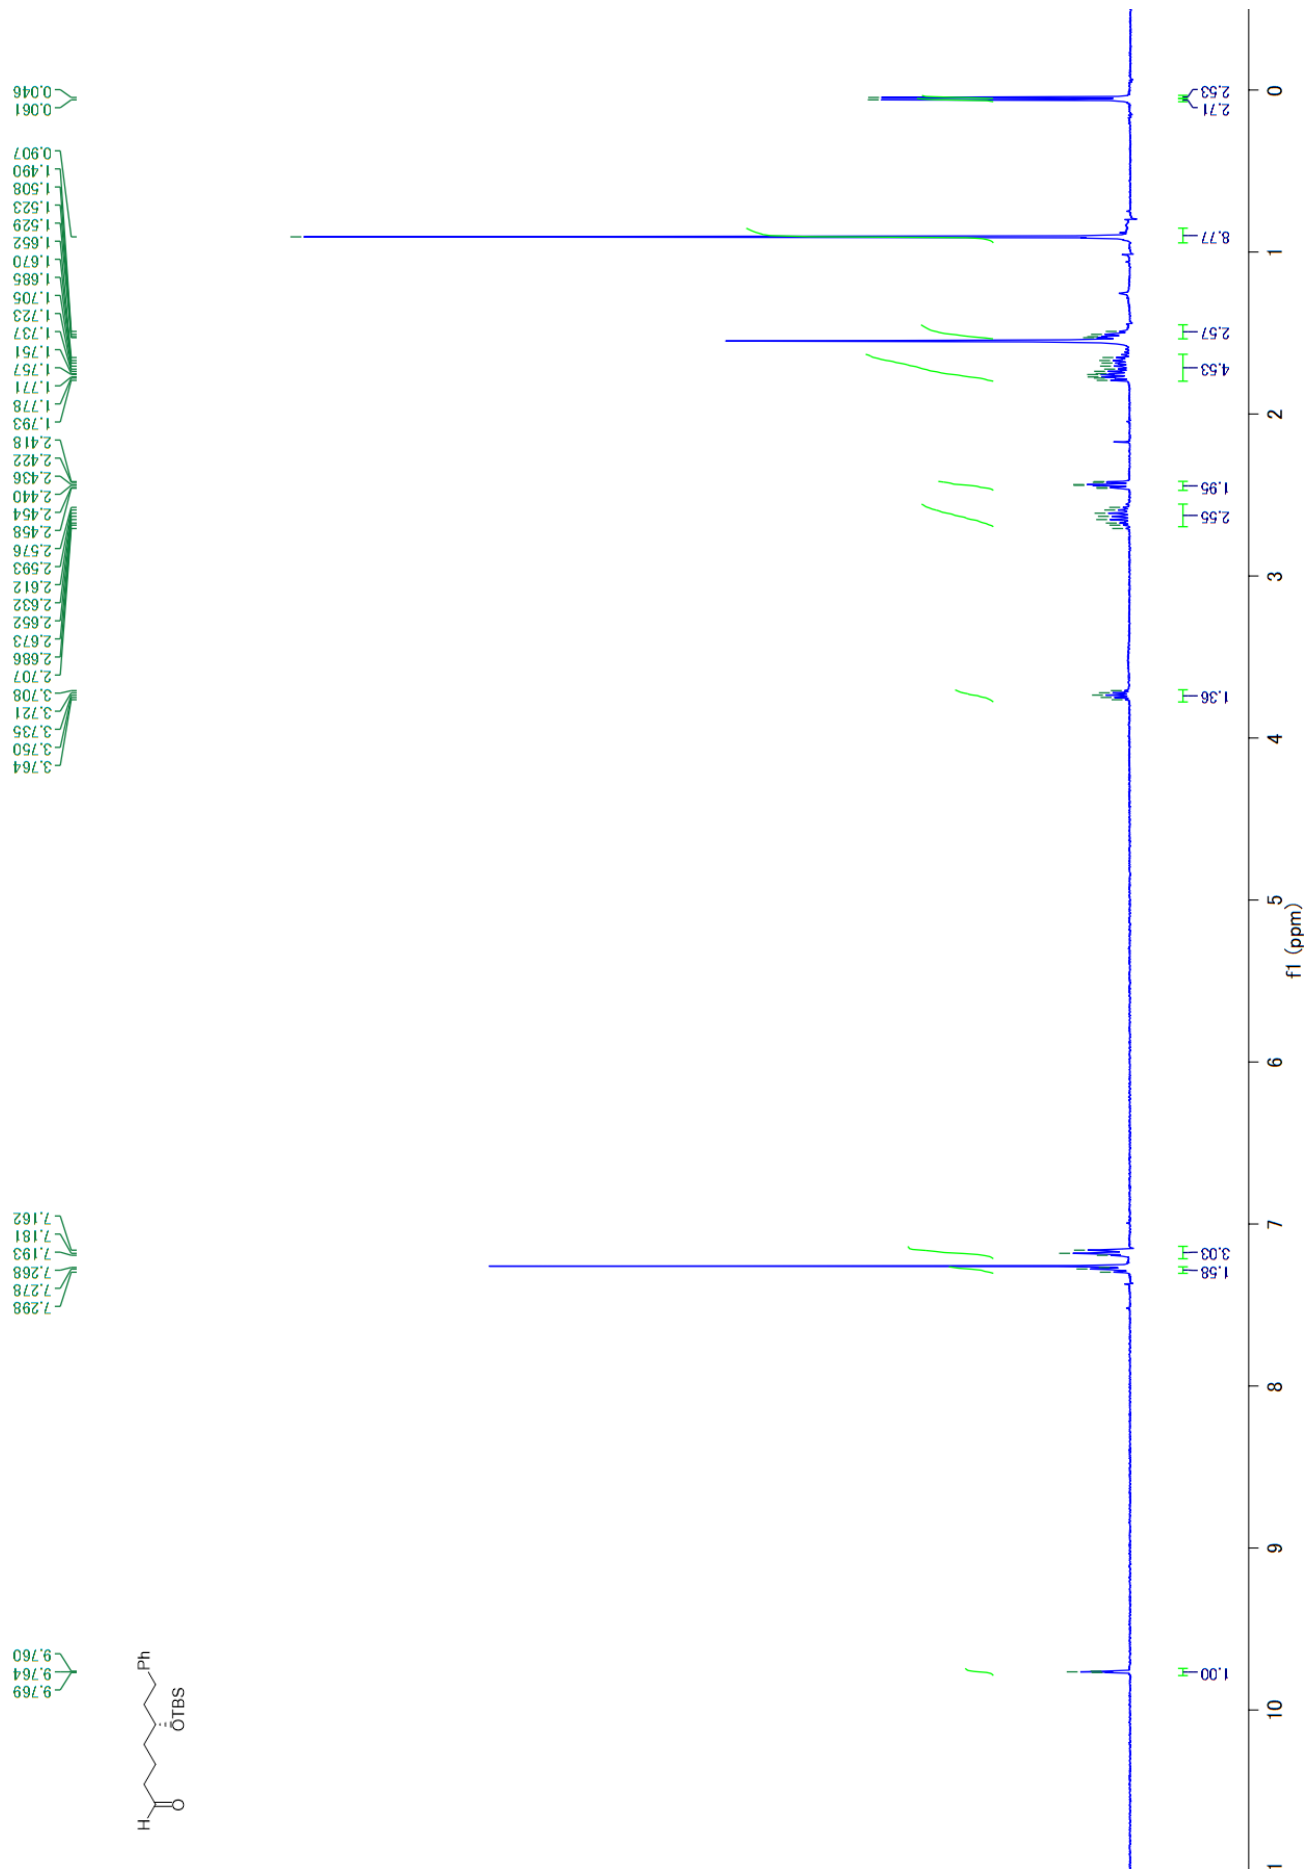

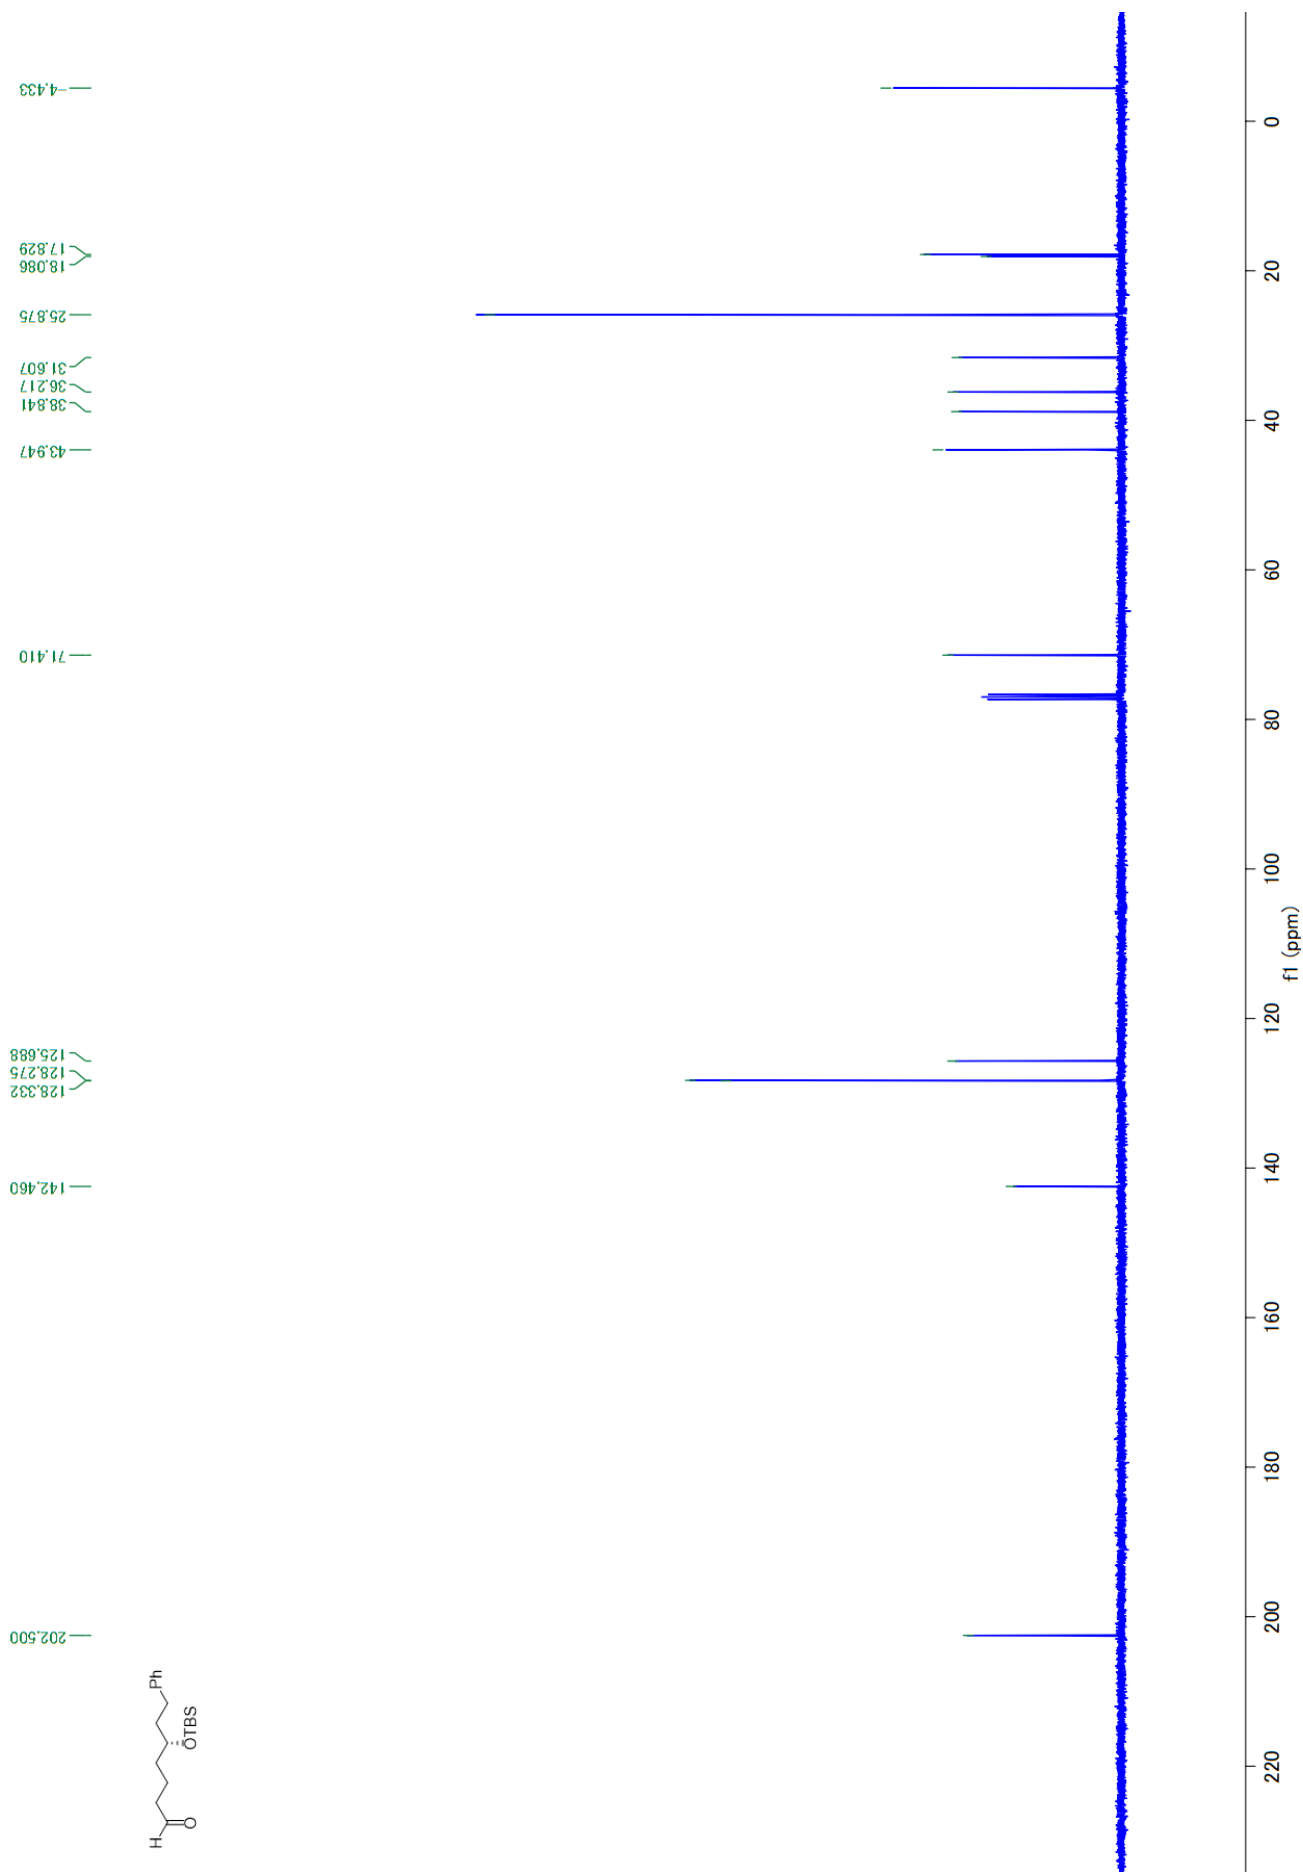



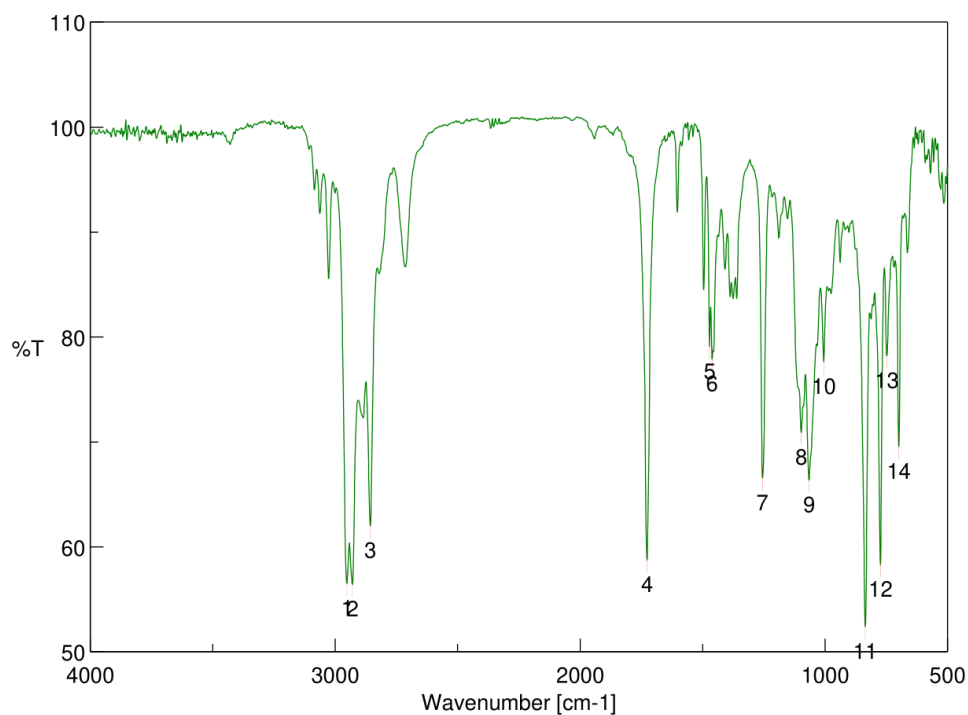

[ ピーク検出結果 ]

| No. | 位置      | 強度      | No. | 位置      | 強度      |
|-----|---------|---------|-----|---------|---------|
| 1   | 2952.48 | 56.5203 | 2   | 2929.34 | 56.429  |
| 3   | 2857.02 | 62.0003 | 4   | 1726.94 | 58.731  |
| 5   | 1472.38 | 79.0522 | 6   | 1460.81 | 77.8931 |
| 7   | 1255.43 | 66.56   | 8   | 1097.3  | 70.8879 |
| 9   | 1065.48 | 66.3433 | 10  | 1005.7  | 77.6204 |
| 11  | 835.99  | 52.3991 | 12  | 774.279 | 58.2819 |
| 13  | 748.245 | 78.1816 | 14  | 699.069 | 69.5435 |

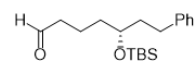

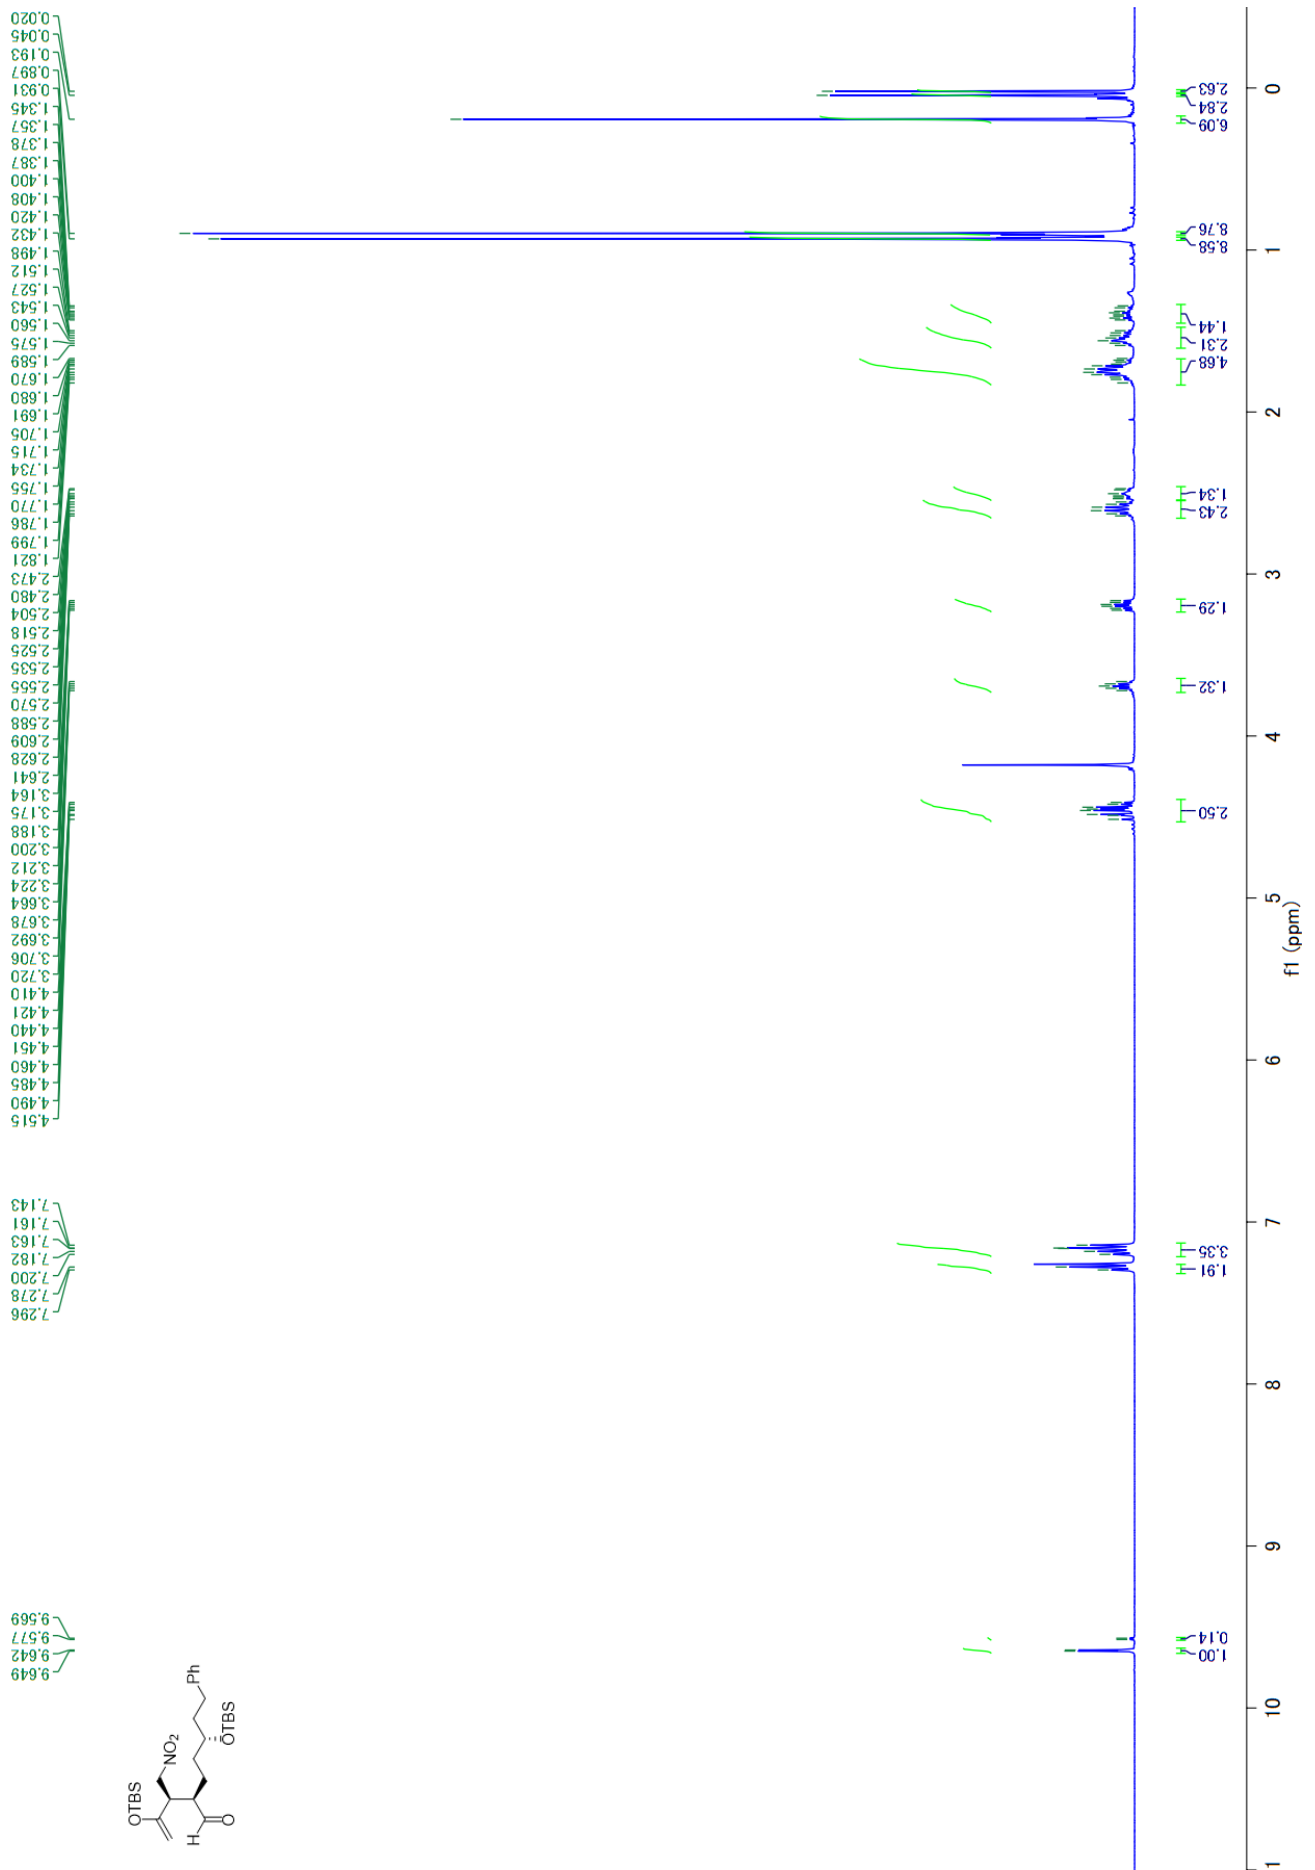

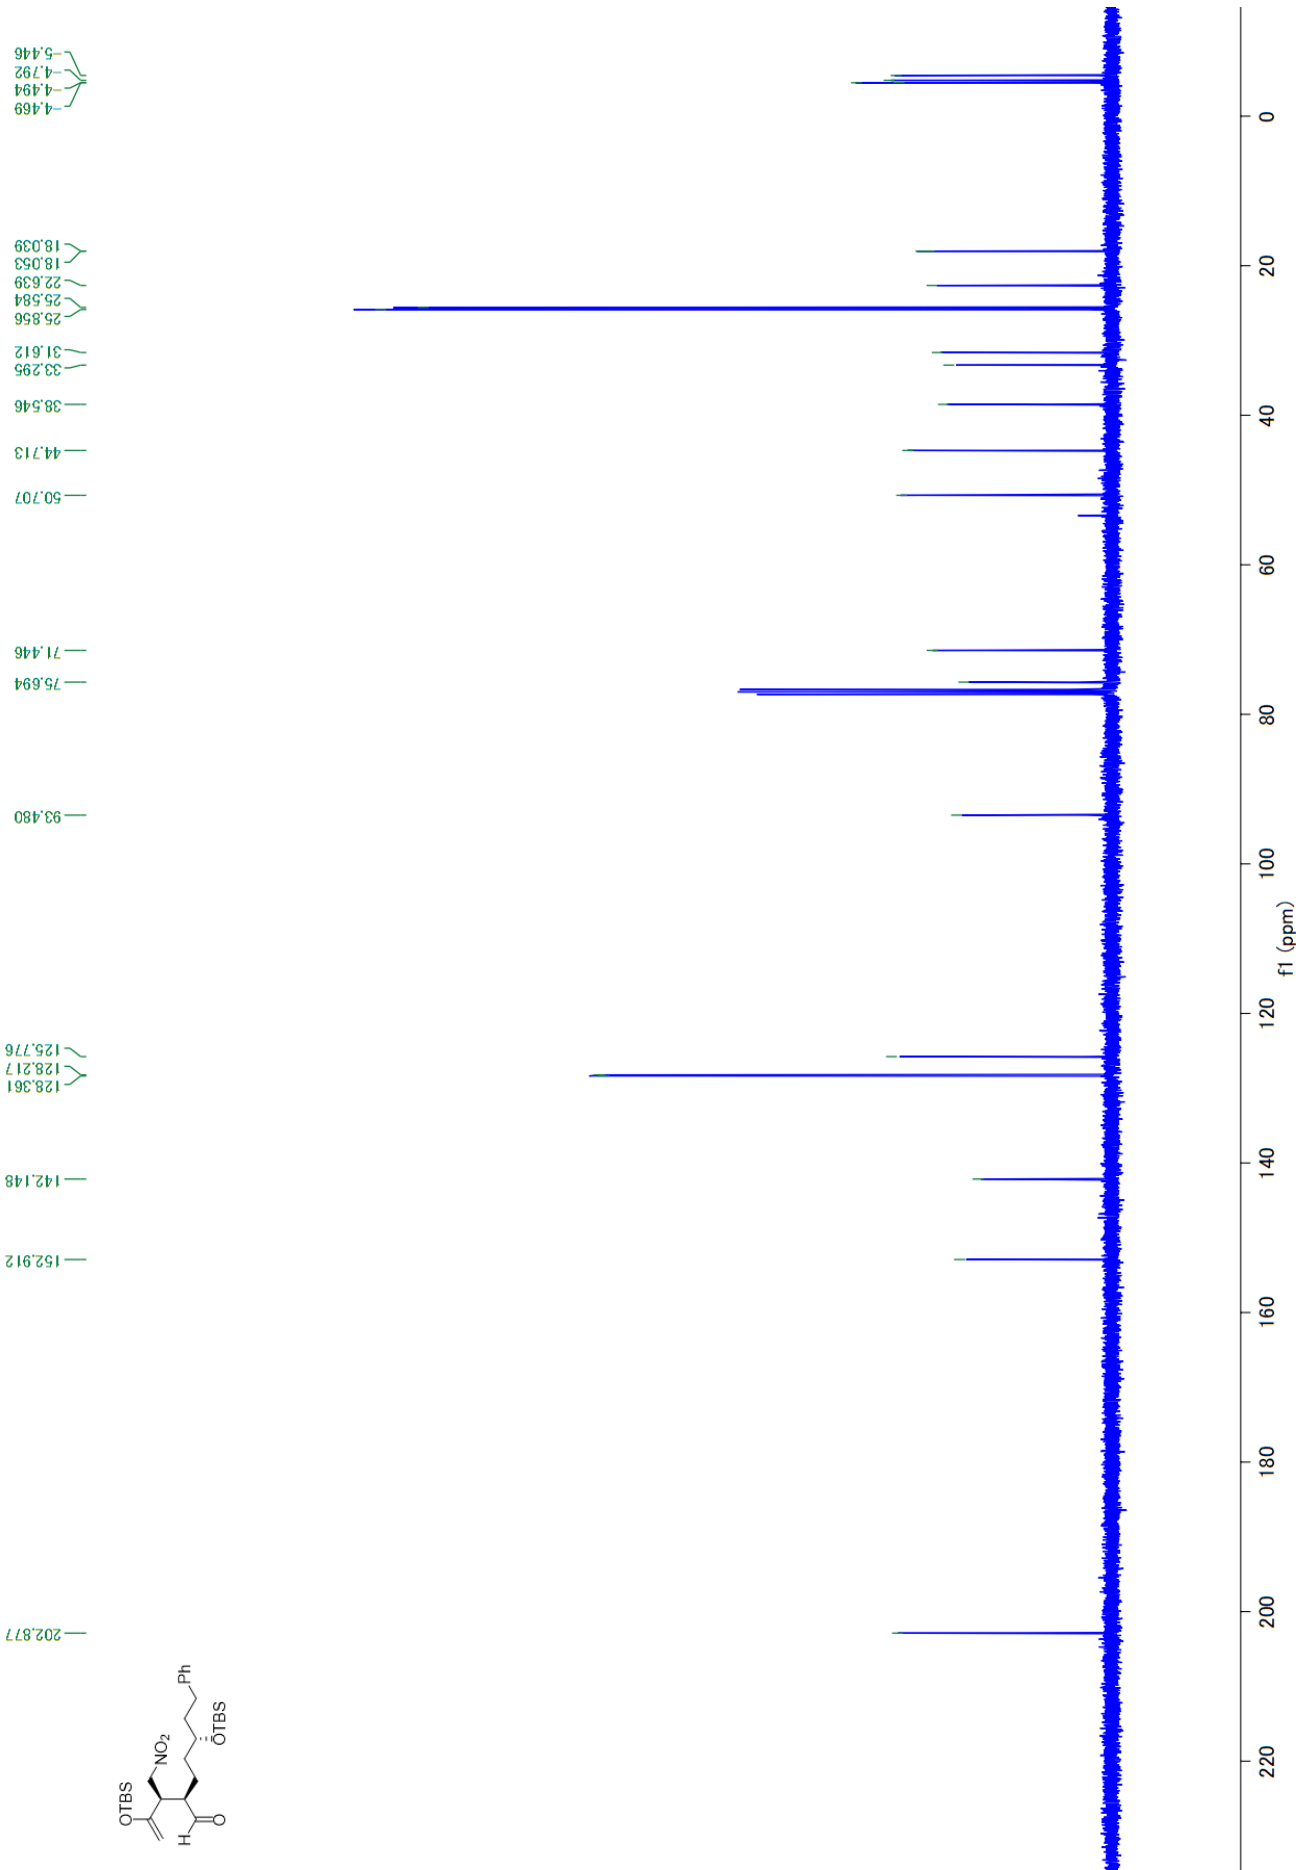

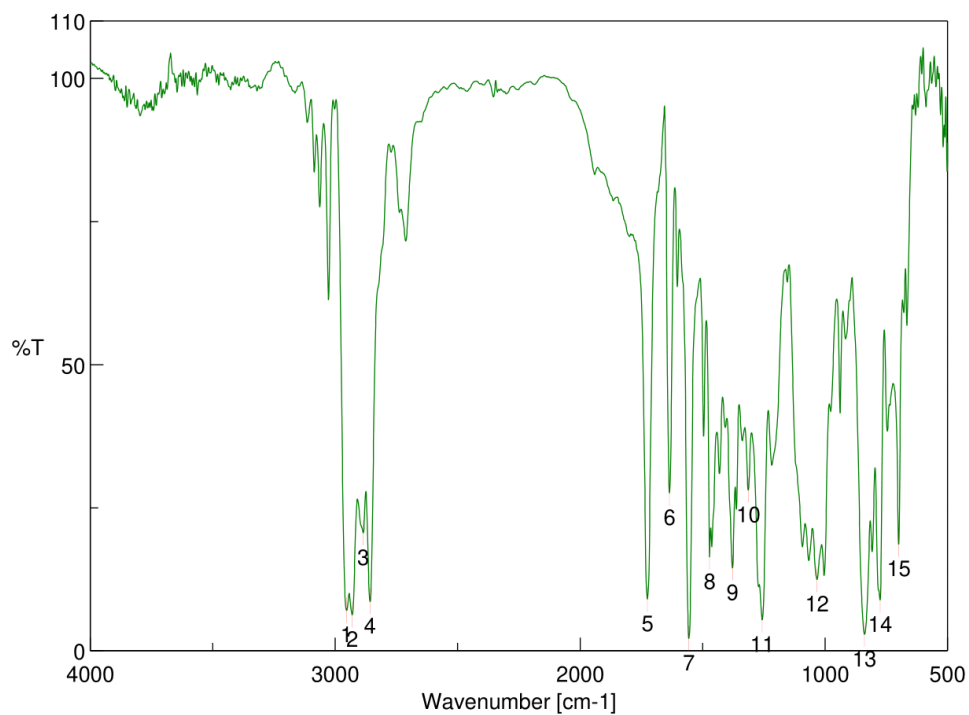

[ ピーク検出結果 ]

| No. | 位置      | 強度      | No. | 位置      | 強度      |
|-----|---------|---------|-----|---------|---------|
| 1   | 2954.41 | 7.08602 | 2   | 2930.31 | 6.2795  |
| 3   | 2885.95 | 20.6093 | 4   | 2857.99 | 8.60048 |
| 5   | 1725.98 | 9.0135  | 6   | 1635.34 | 27.5647 |
| 7   | 1556.27 | 2.16618 | 8   | 1471.42 | 16.387  |
| 9   | 1377.89 | 14.4652 | 10  | 1313.29 | 28.0542 |
| 11  | 1256.4  | 5.39997 | 12  | 1032.69 | 12.4636 |
| 13  | 838.883 | 2.90289 | 14  | 775.244 | 8.86751 |
| 15  | 699.069 | 18.6111 |     |         |         |

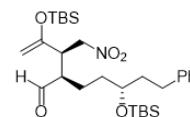

Michael-proton

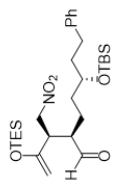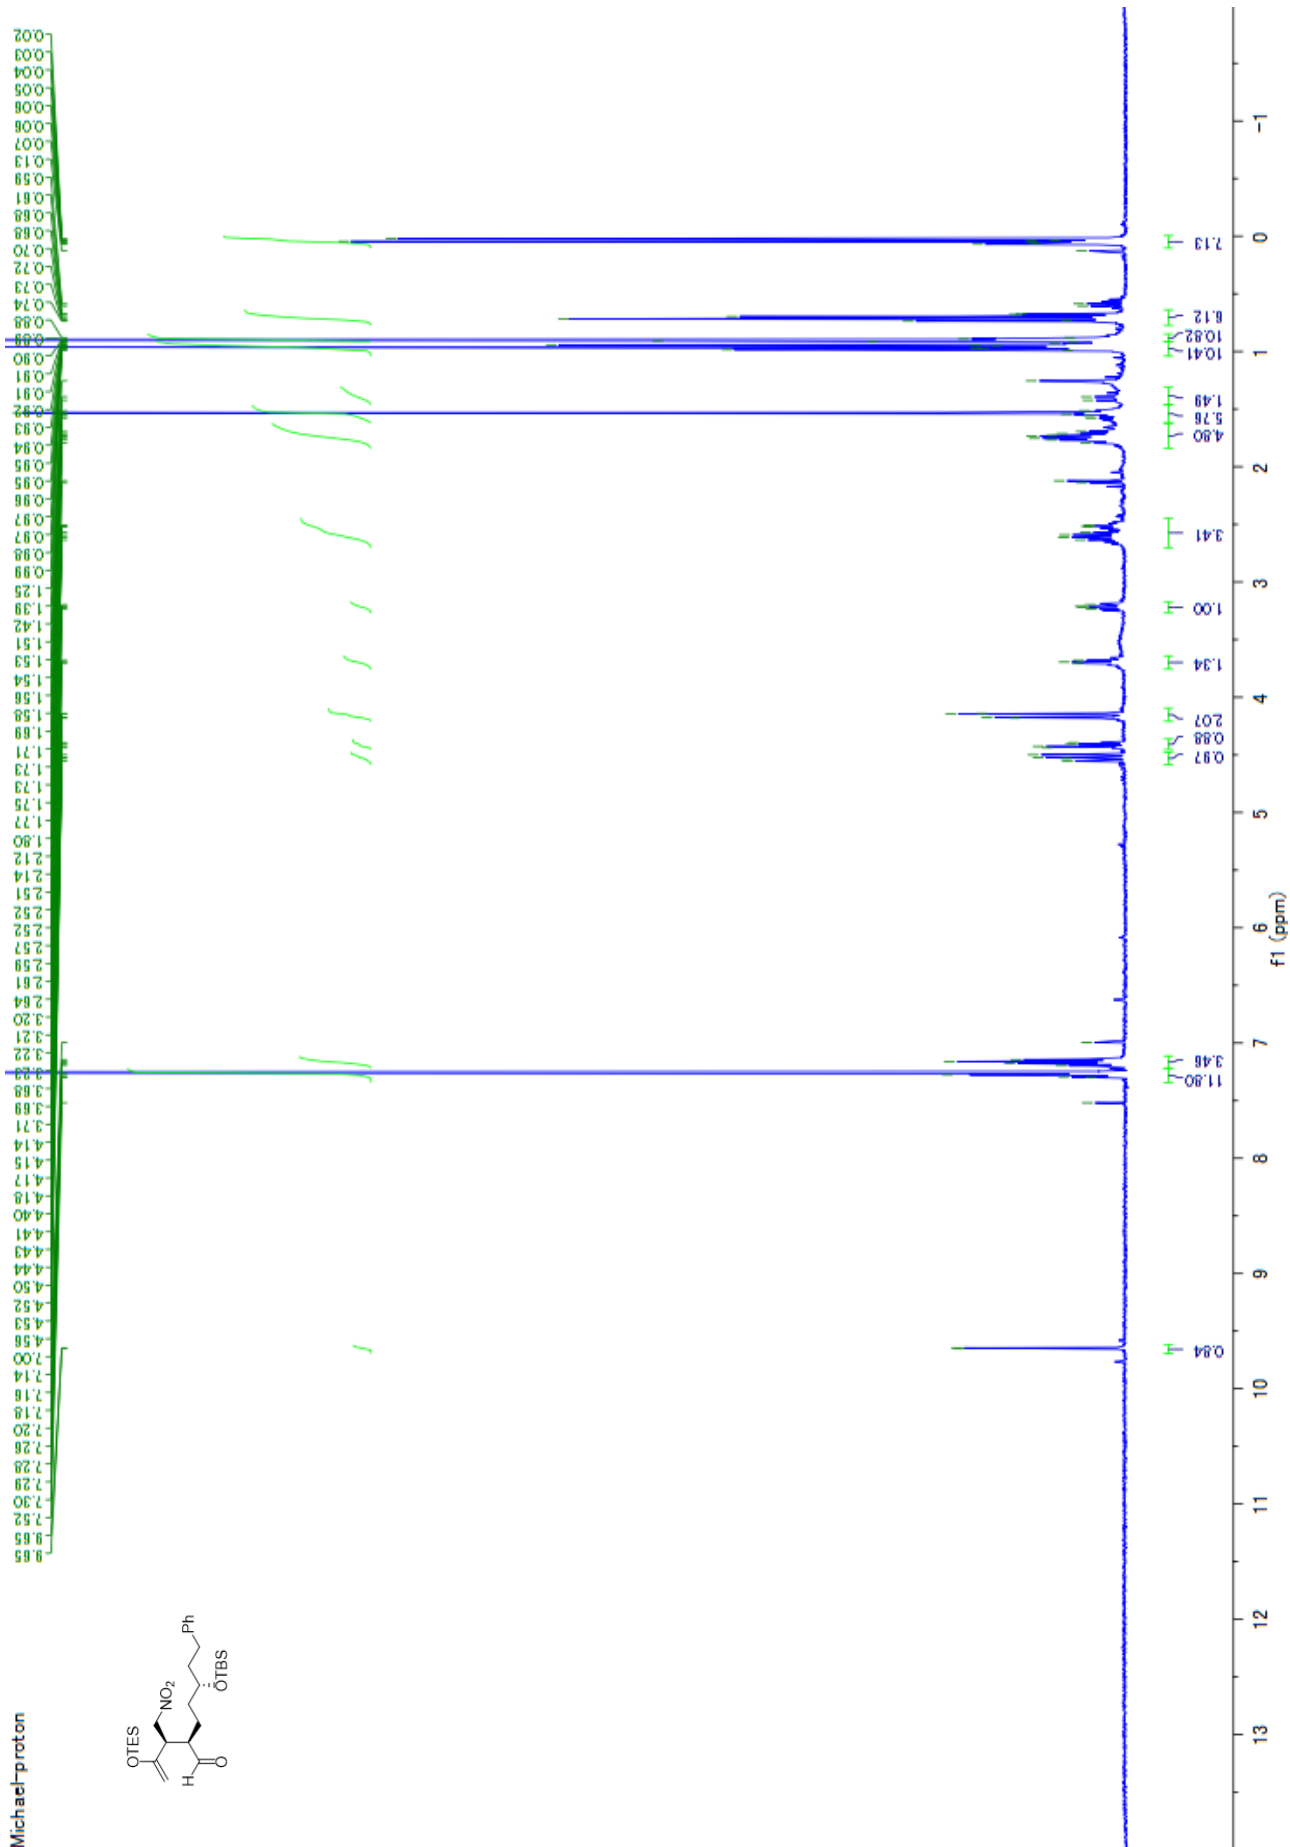

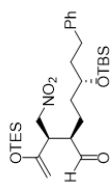

202.82  
 153.25  
 142.20  
 128.37  
 128.23  
 125.78  
 92.66  
 77.33  
 77.01  
 76.69  
 75.48  
 71.47  
 50.87  
 44.74  
 38.52  
 33.50  
 31.68  
 25.66  
 22.49  
 18.07  
 6.60  
 4.60  
 -4.47

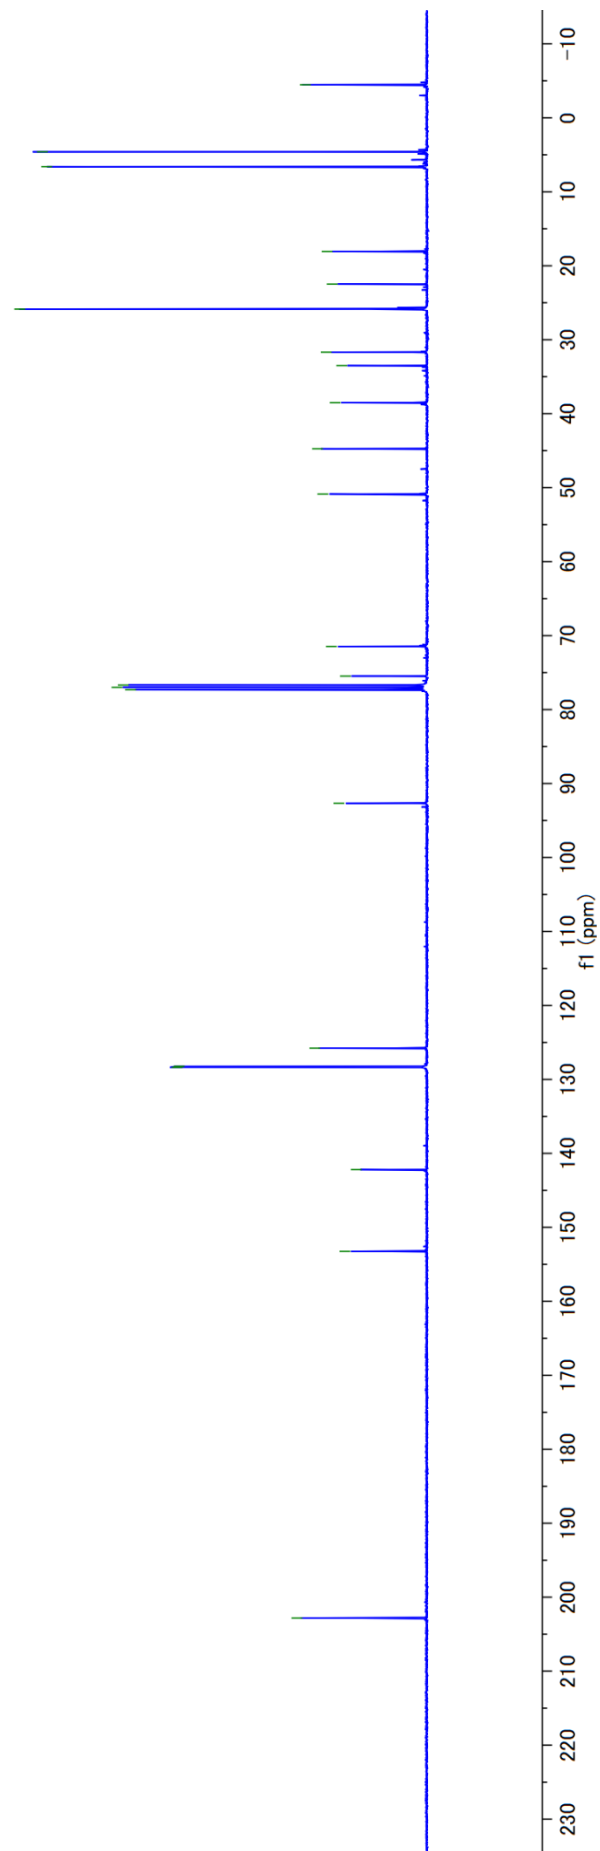

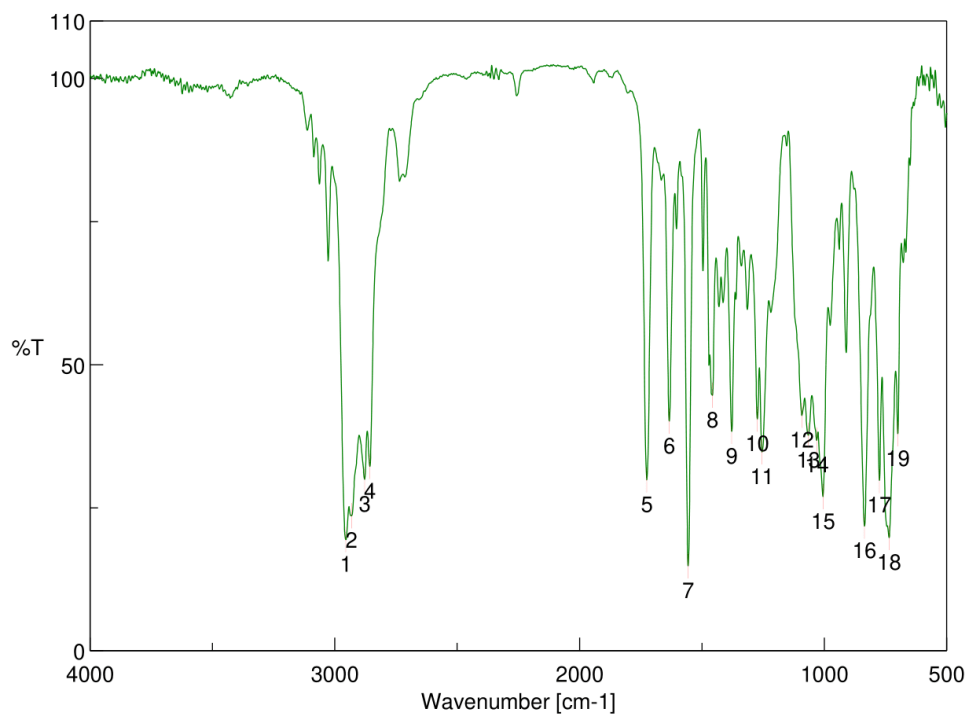

[ ピーク検出結果 ]

| No. | 位置      | 強度      | No. | 位置      | 強度      |
|-----|---------|---------|-----|---------|---------|
| 1   | 2955.38 | 19.3965 | 2   | 2931.27 | 23.5927 |
| 3   | 2878.24 | 29.9575 | 4   | 2857.02 | 32.2007 |
| 5   | 1725.01 | 29.843  | 6   | 1633.41 | 40.0903 |
| 7   | 1556.27 | 14.8317 | 8   | 1456.96 | 44.6393 |
| 9   | 1378.85 | 38.3373 | 10  | 1273.75 | 40.4666 |
| 11  | 1254.47 | 34.7418 | 12  | 1091.51 | 41.1178 |
| 13  | 1065.48 | 37.6384 | 14  | 1030.77 | 36.7461 |
| 15  | 1005.7  | 26.907  | 16  | 835.99  | 21.7833 |
| 17  | 775.244 | 29.7326 | 18  | 735.71  | 19.773  |
| 19  | 700.034 | 37.8804 |     |         |         |

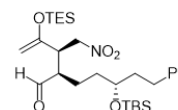

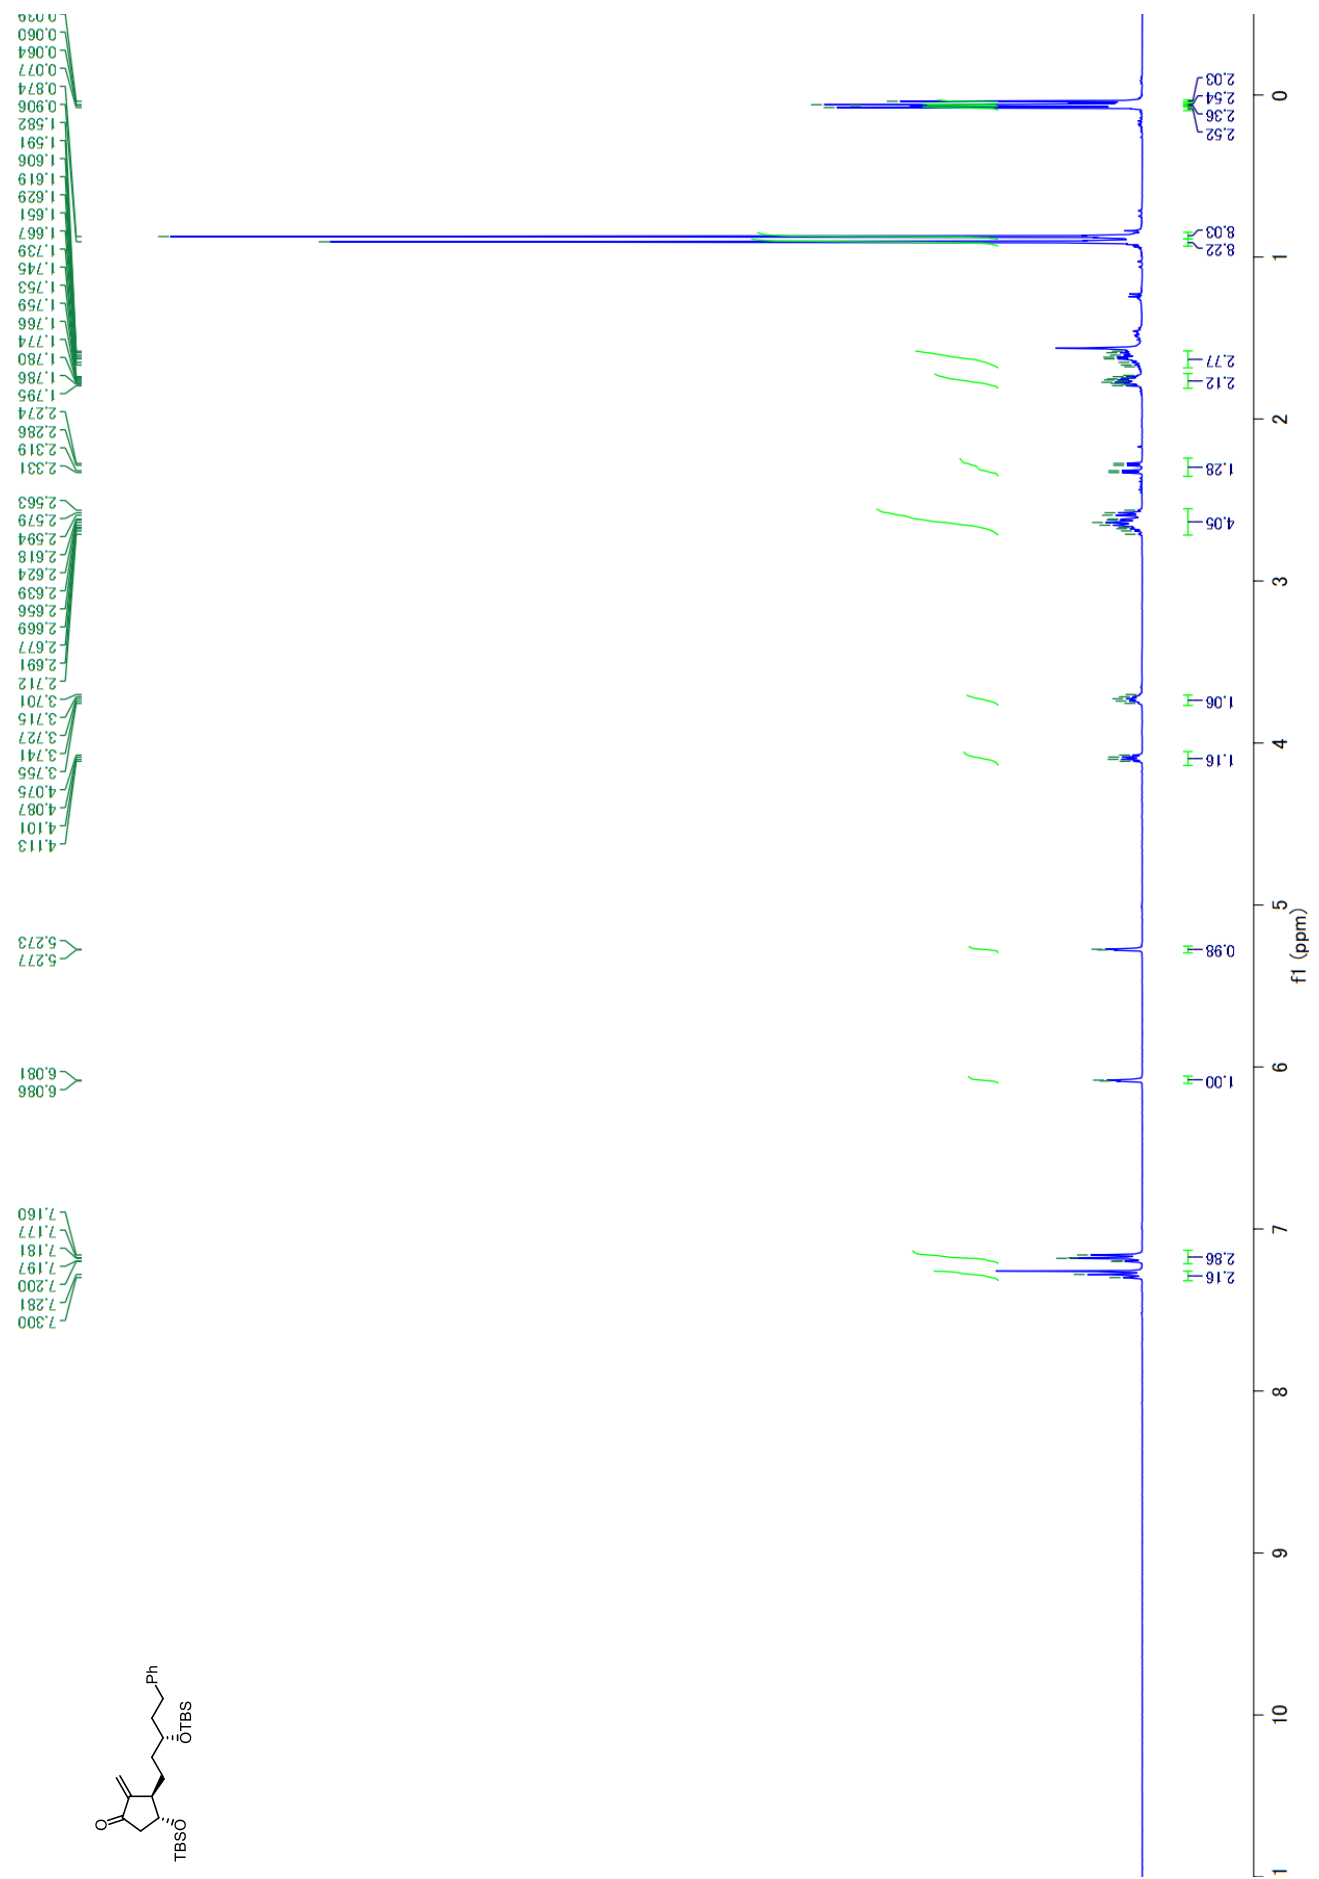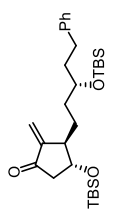



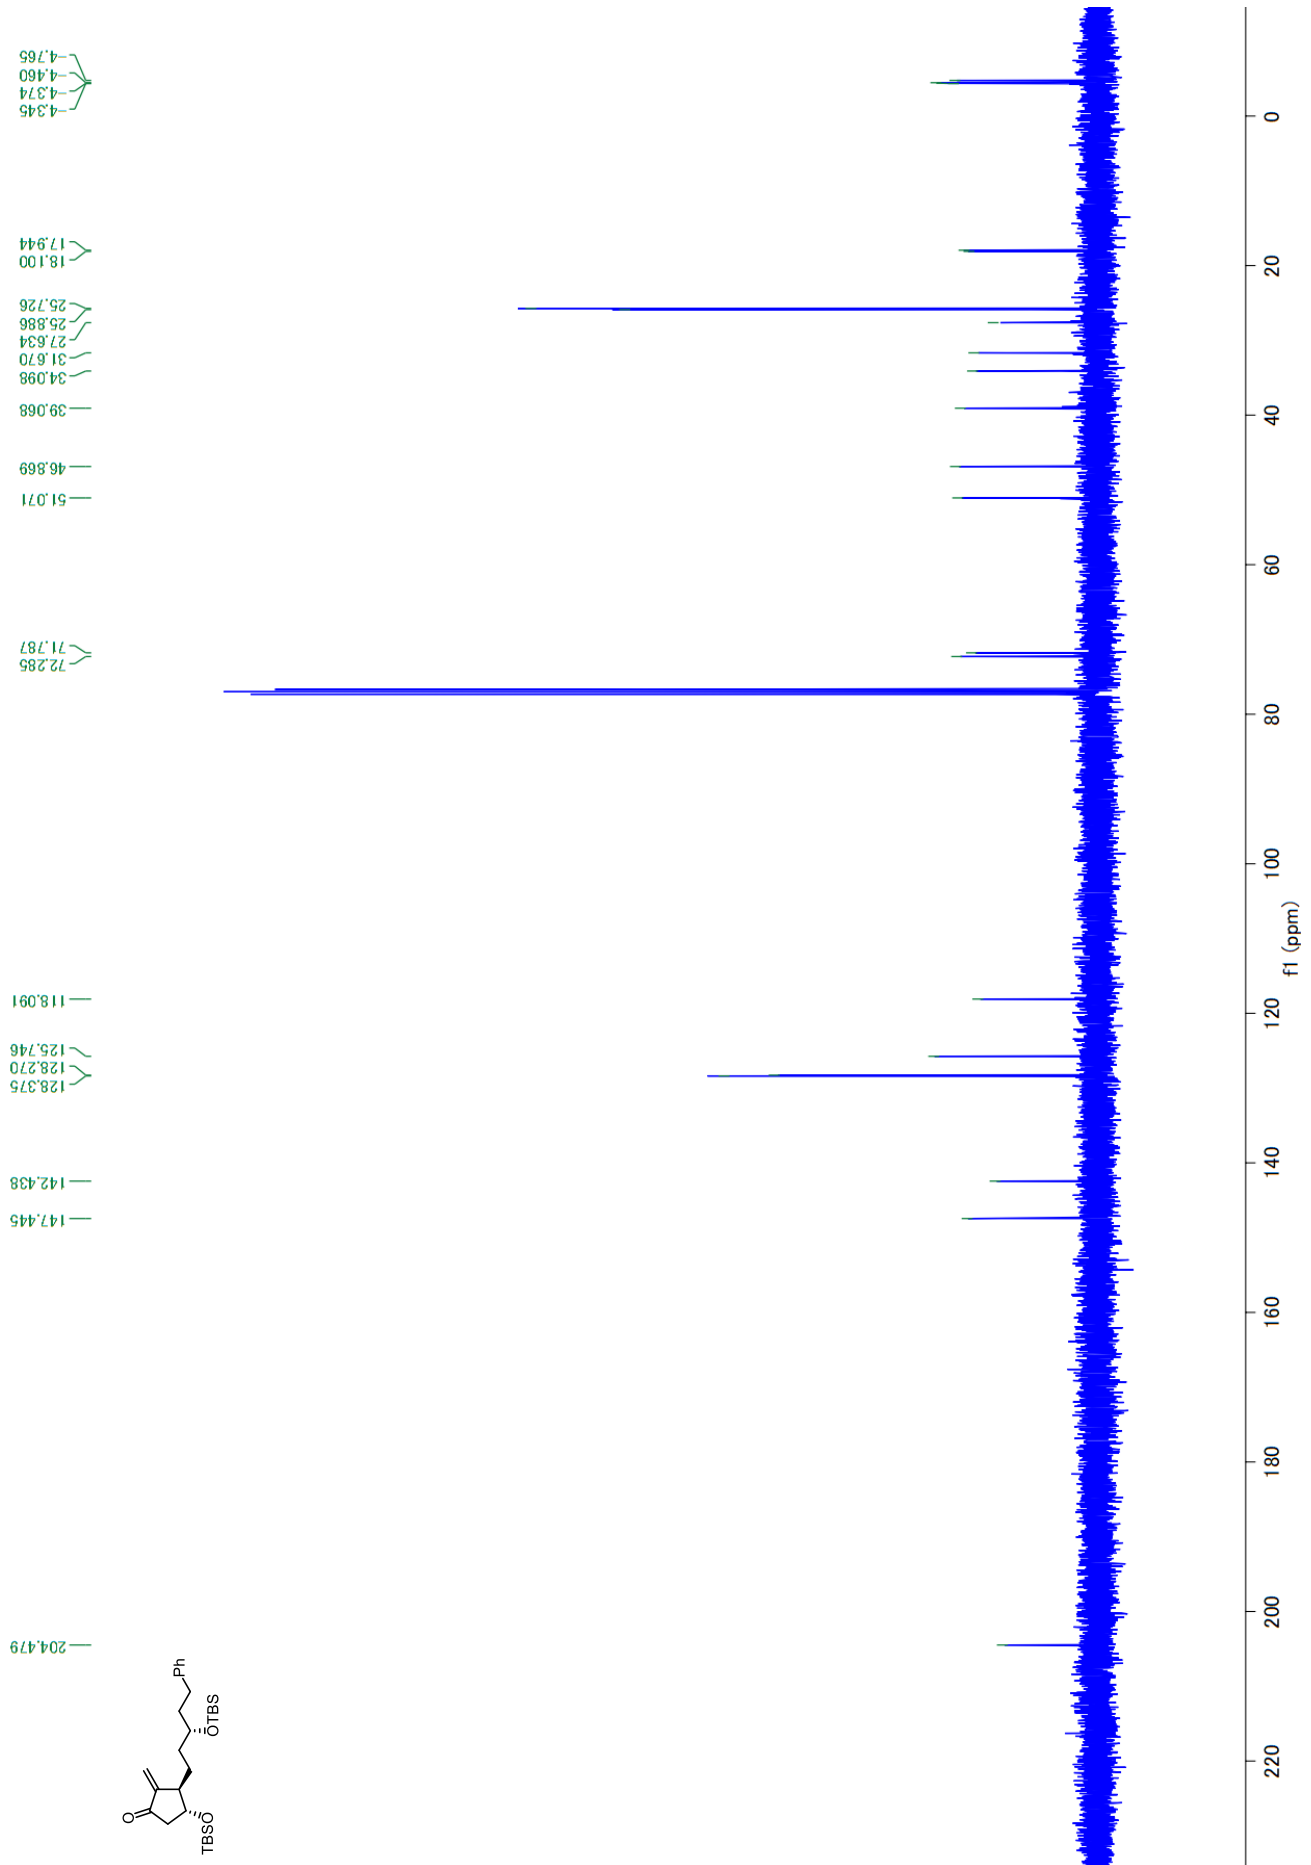

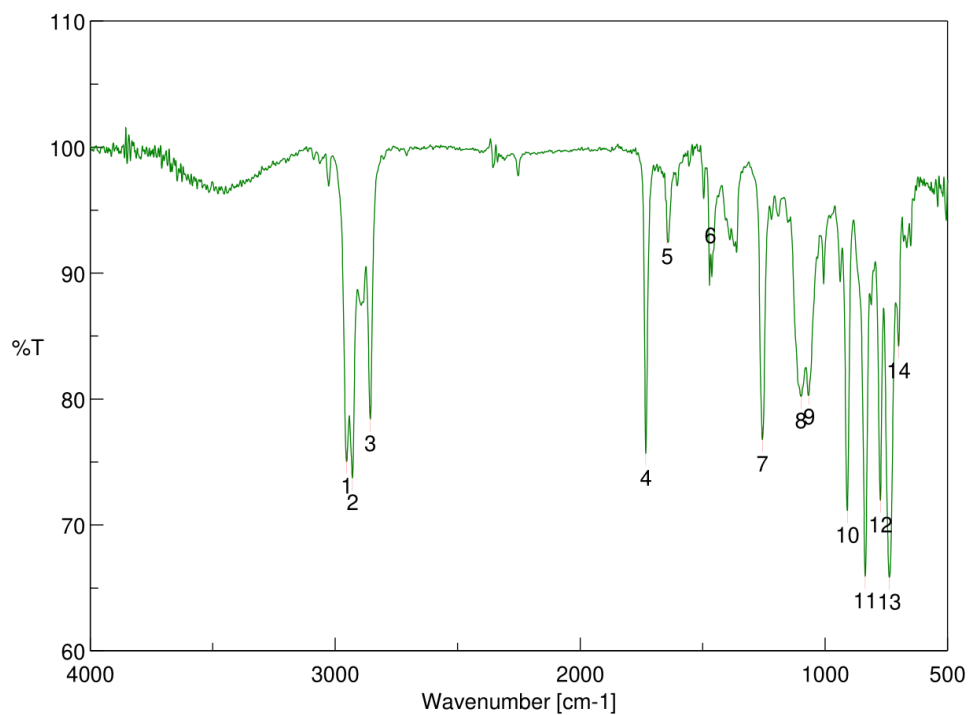

[ ピーク検出結果 ]

| No. | 位置      | 強度      | No. | 位置      | 強度      |
|-----|---------|---------|-----|---------|---------|
| 1   | 2953.45 | 75.0153 | 2   | 2929.34 | 73.717  |
| 3   | 2857.02 | 78.4041 | 4   | 1731.76 | 75.6663 |
| 5   | 1644.98 | 93.2402 | 6   | 1468.53 | 90.9814 |
| 7   | 1255.43 | 76.7797 | 8   | 1098.26 | 80.2095 |
| 9   | 1065.48 | 80.5316 | 10  | 909.272 | 71.1243 |
| 11  | 835.99  | 65.908  | 12  | 774.279 | 71.94   |
| 13  | 737.639 | 65.8254 | 14  | 700.034 | 84.184  |

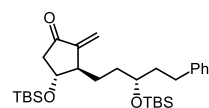

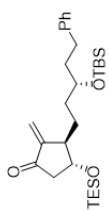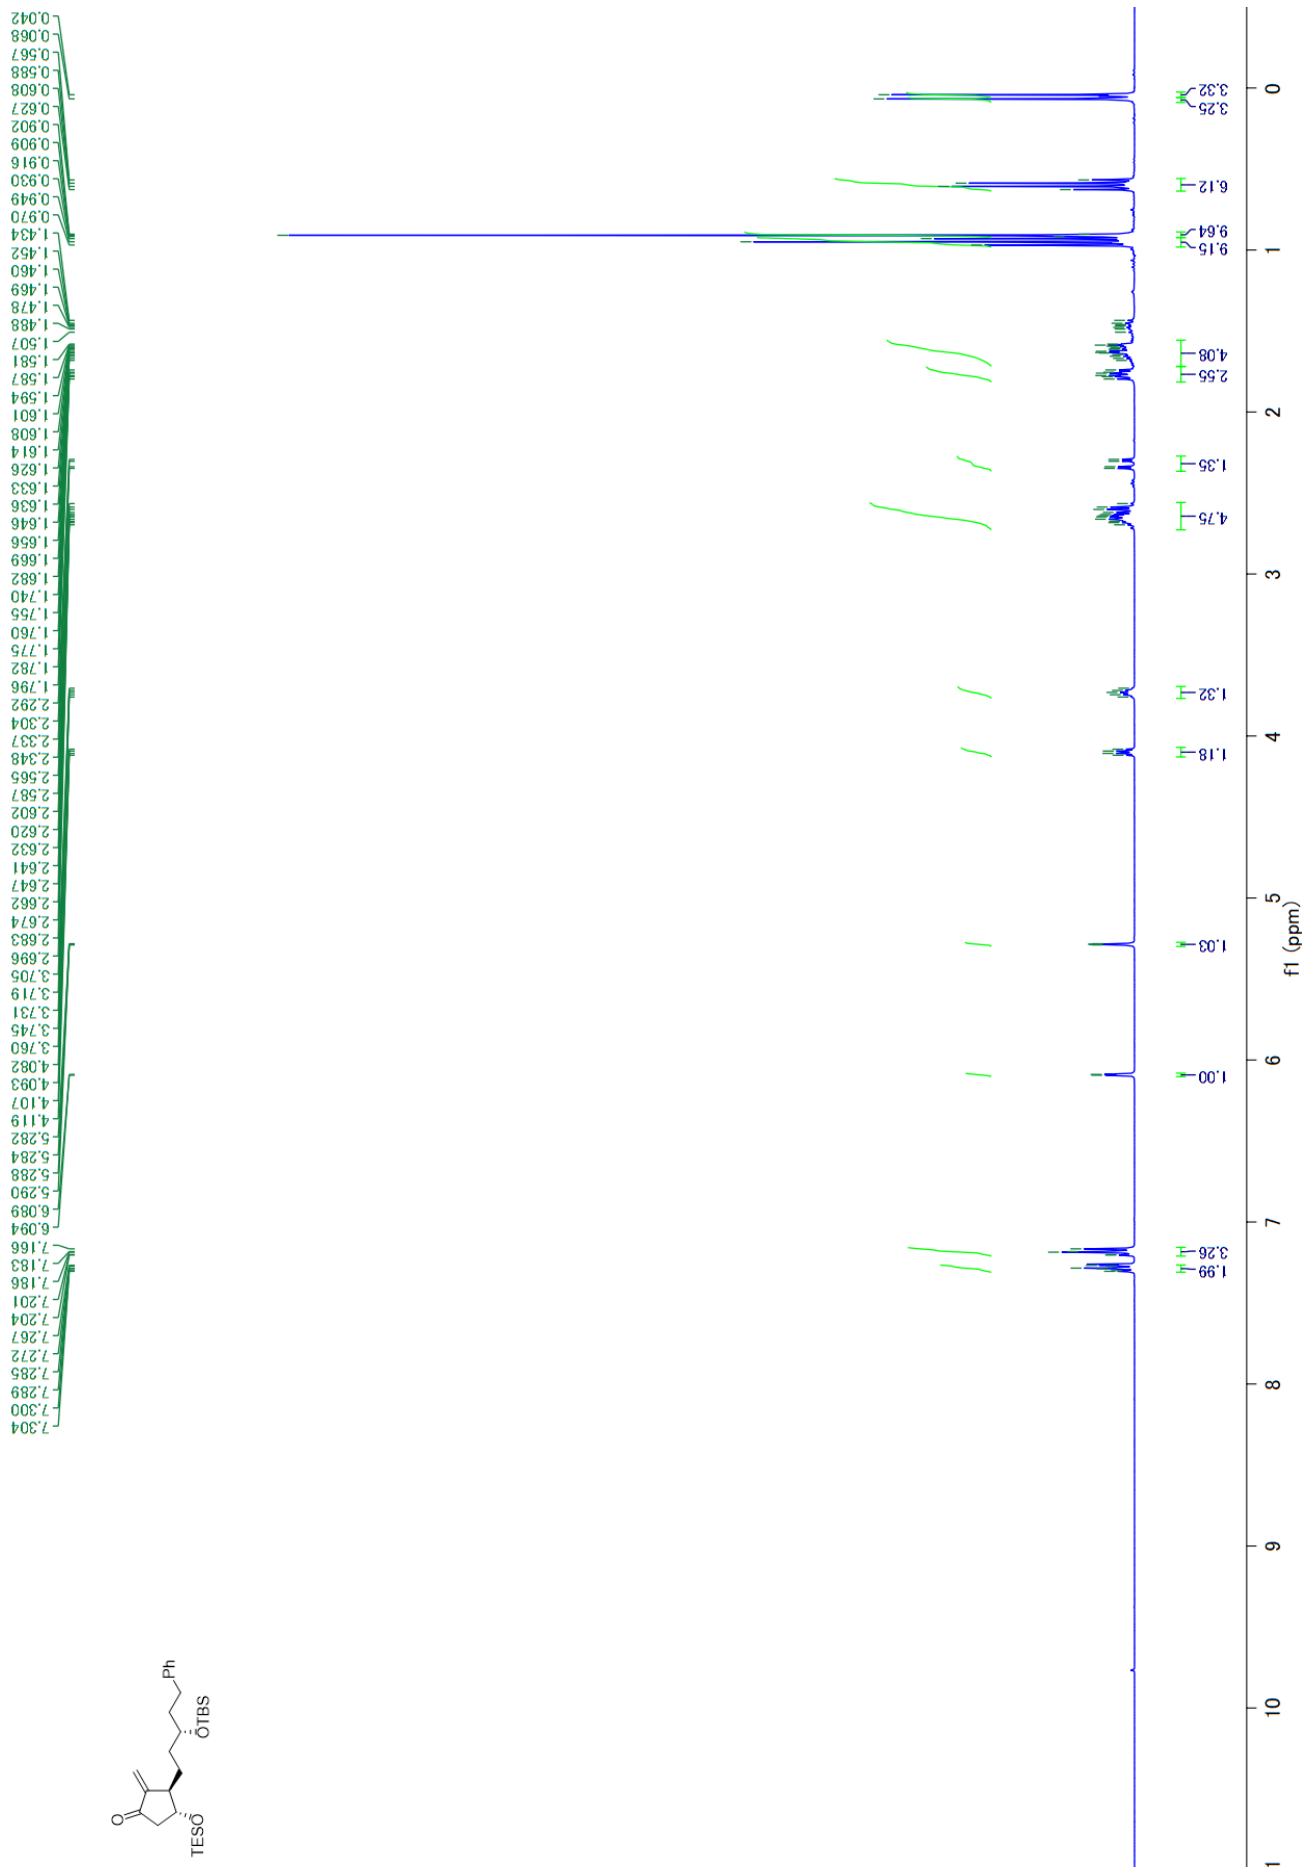

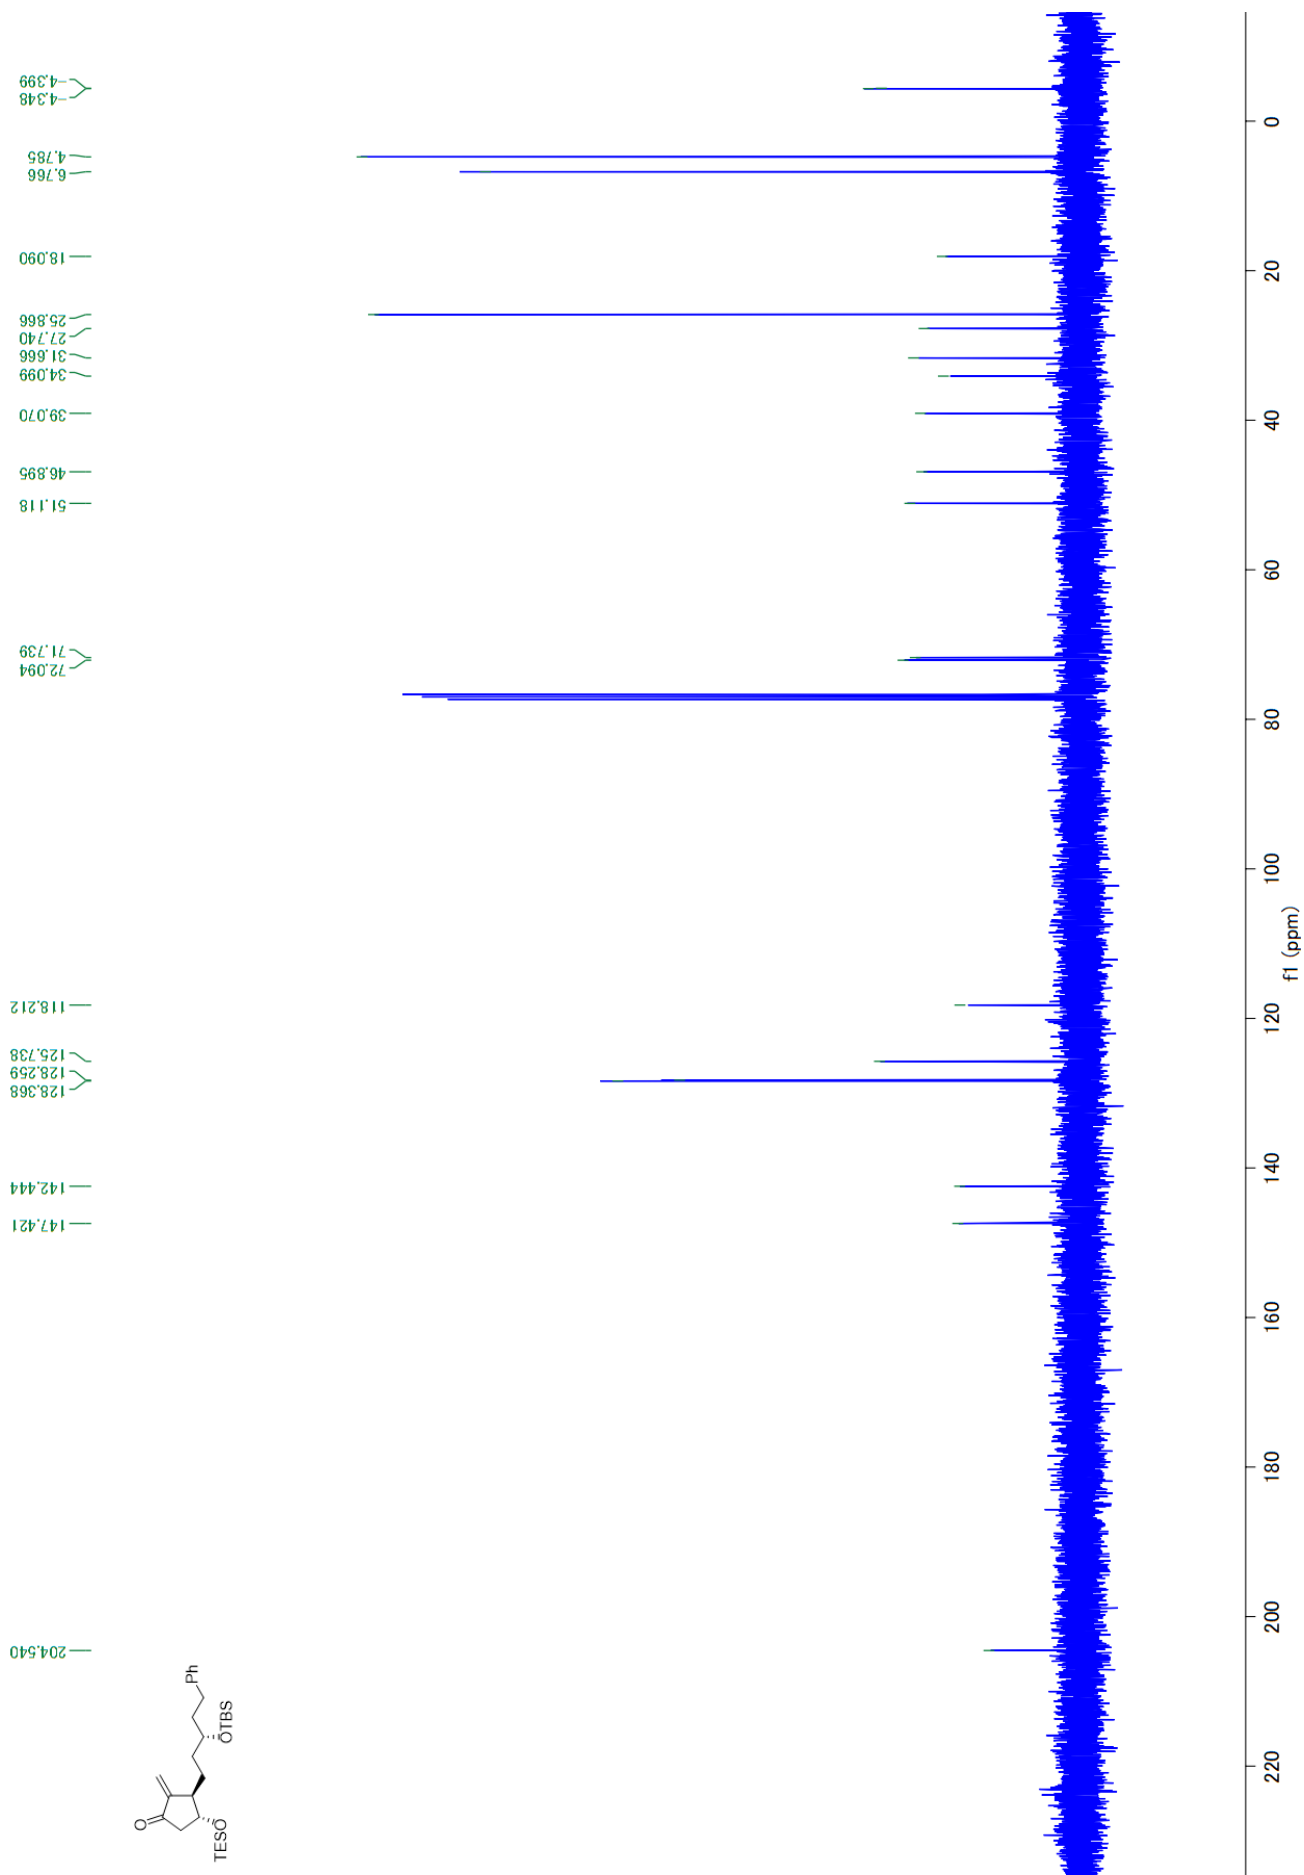

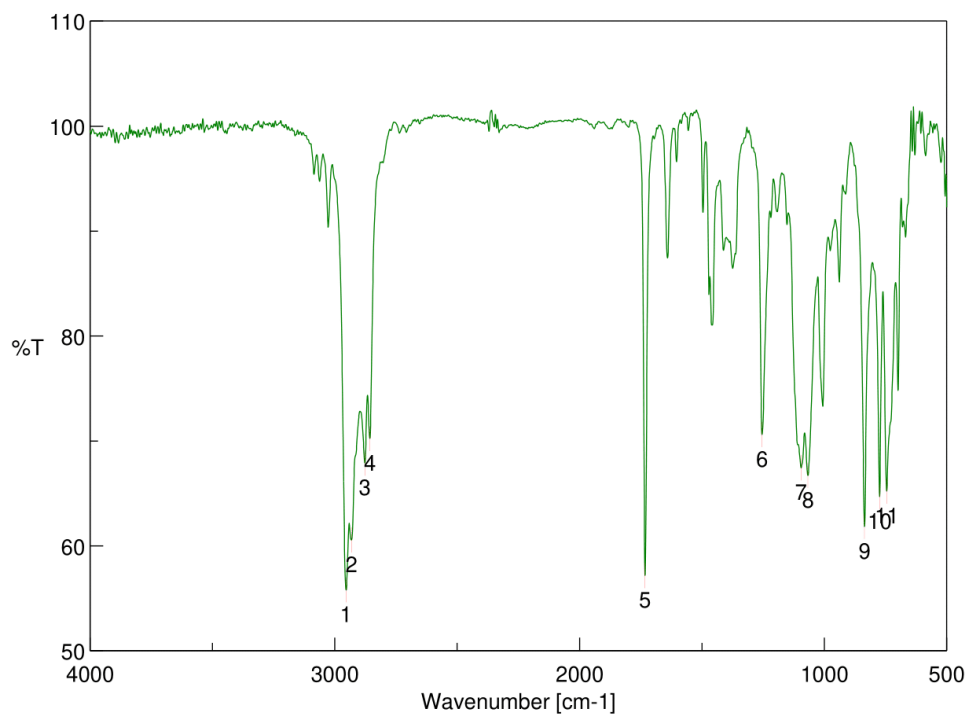

[ ピーク検出結果 ]

| No. | 位置      | 強度      | No. | 位置      | 強度      |
|-----|---------|---------|-----|---------|---------|
| 1   | 2954.41 | 55.7936 | 2   | 2932.23 | 60.5617 |
| 3   | 2877.27 | 67.8722 | 4   | 2857.02 | 70.224  |
| 5   | 1732.73 | 57.1651 | 6   | 1254.47 | 70.5878 |
| 7   | 1095.37 | 67.4285 | 8   | 1067.41 | 66.6962 |
| 9   | 835.99  | 61.8414 | 10  | 774.279 | 64.6805 |
| 11  | 745.352 | 65.2037 |     |         |         |

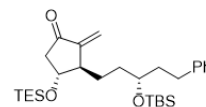

面積%レポート

ディレクトリ名: C:\Documents and Settings\kawauchi\My Documents\2023-07-26 17-04-27 kawauchi Mukaiyama\doi\_00-H\_2000vst\_1ml\_chi.dat  
 ファイル名: C:\EZChrom Elite\EnterpriseProjects\Default\Method\100vst.met  
 システム名: System  
 分析日時: 2023/07/26 17:05:04  
 印刷日時: 2023/07/26 17:57:32

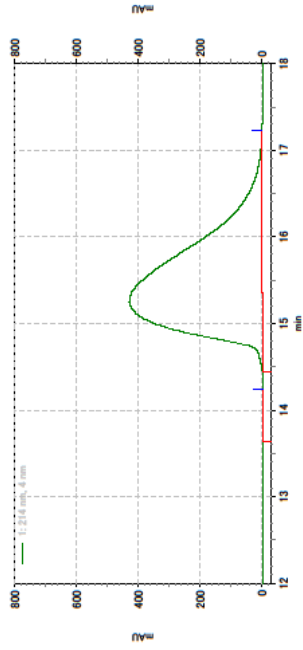

| PK # | 名前 | 保持時間  | 面積       | 面積%    | λ-校正コート |
|------|----|-------|----------|--------|---------|
| 1    |    | 13.97 | 75482    | 0.067  | MM      |
| 2    |    | 15.25 | 11222977 | 99.933 | MM      |

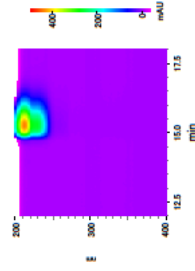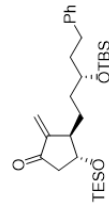

面積%レポート

ディレクトリ名: C:\Documents and Settings\kawauchi\My Documents\2023-07-26 17-58-30 kawauchi Mukaiyama\doi\_00-H\_2000vst\_1ml\_fac.dat  
 ファイル名: C:\EZChrom Elite\EnterpriseProjects\Default\Method\100vst.met  
 システム名: System  
 分析日時: 2023/07/26 17:59:48  
 印刷日時: 2023/07/26 18:21:43

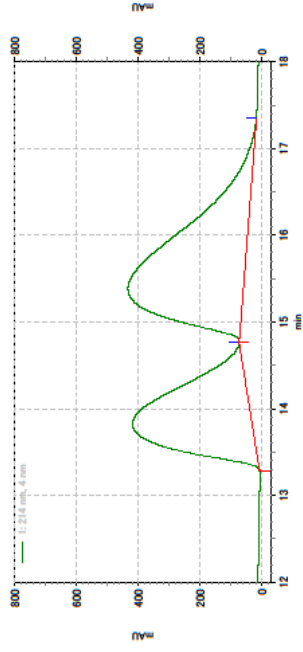

| PK # | 名前 | 保持時間  | 面積        | 面積%    | λ-校正コート |
|------|----|-------|-----------|--------|---------|
| 1    |    | 13.83 | 74560763  | 41.595 | MM      |
| 2    |    | 15.38 | 104692772 | 58.405 | MM      |

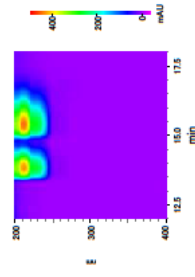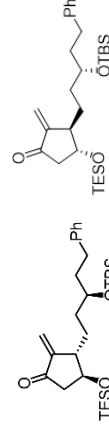

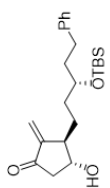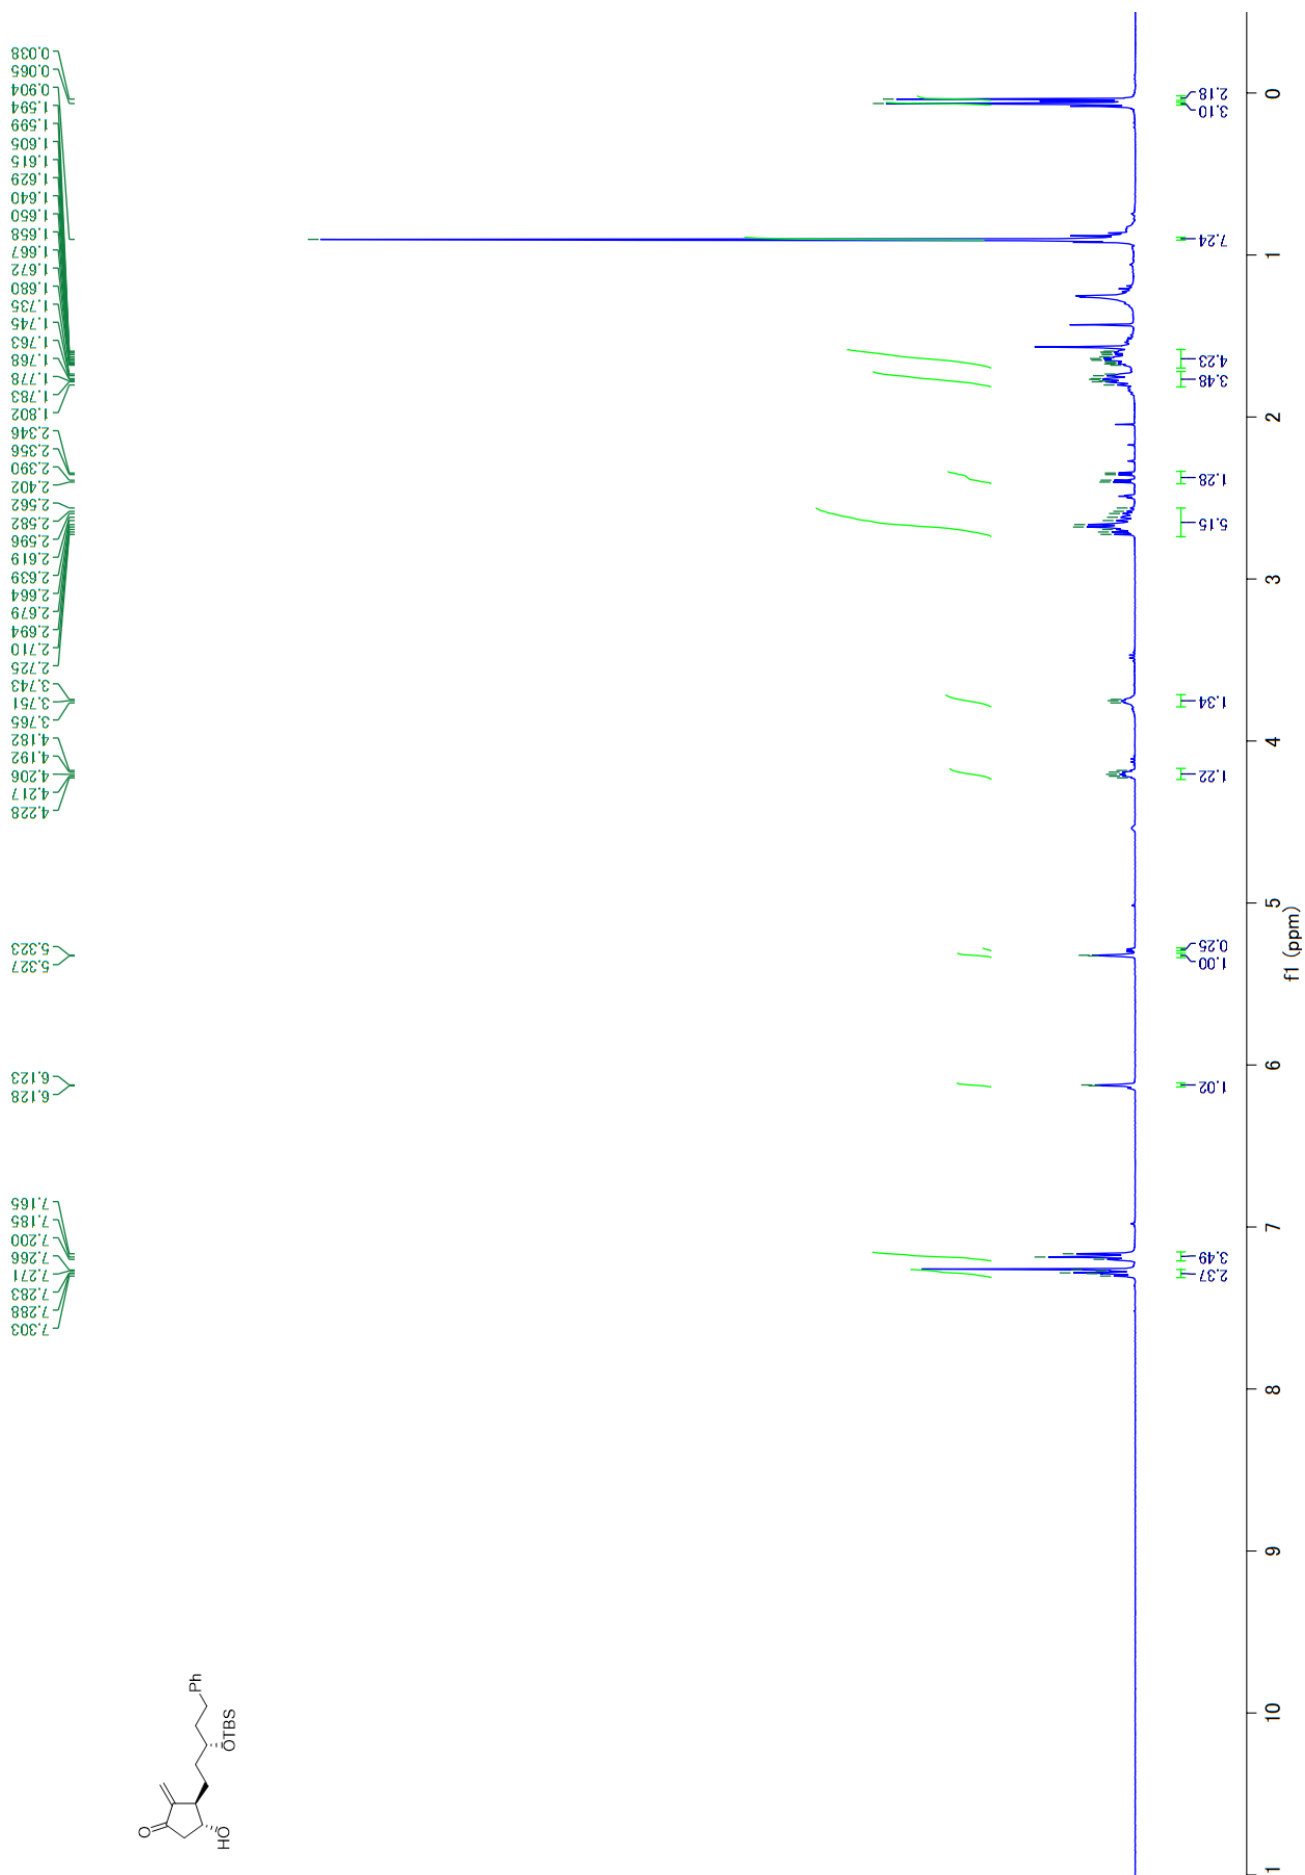

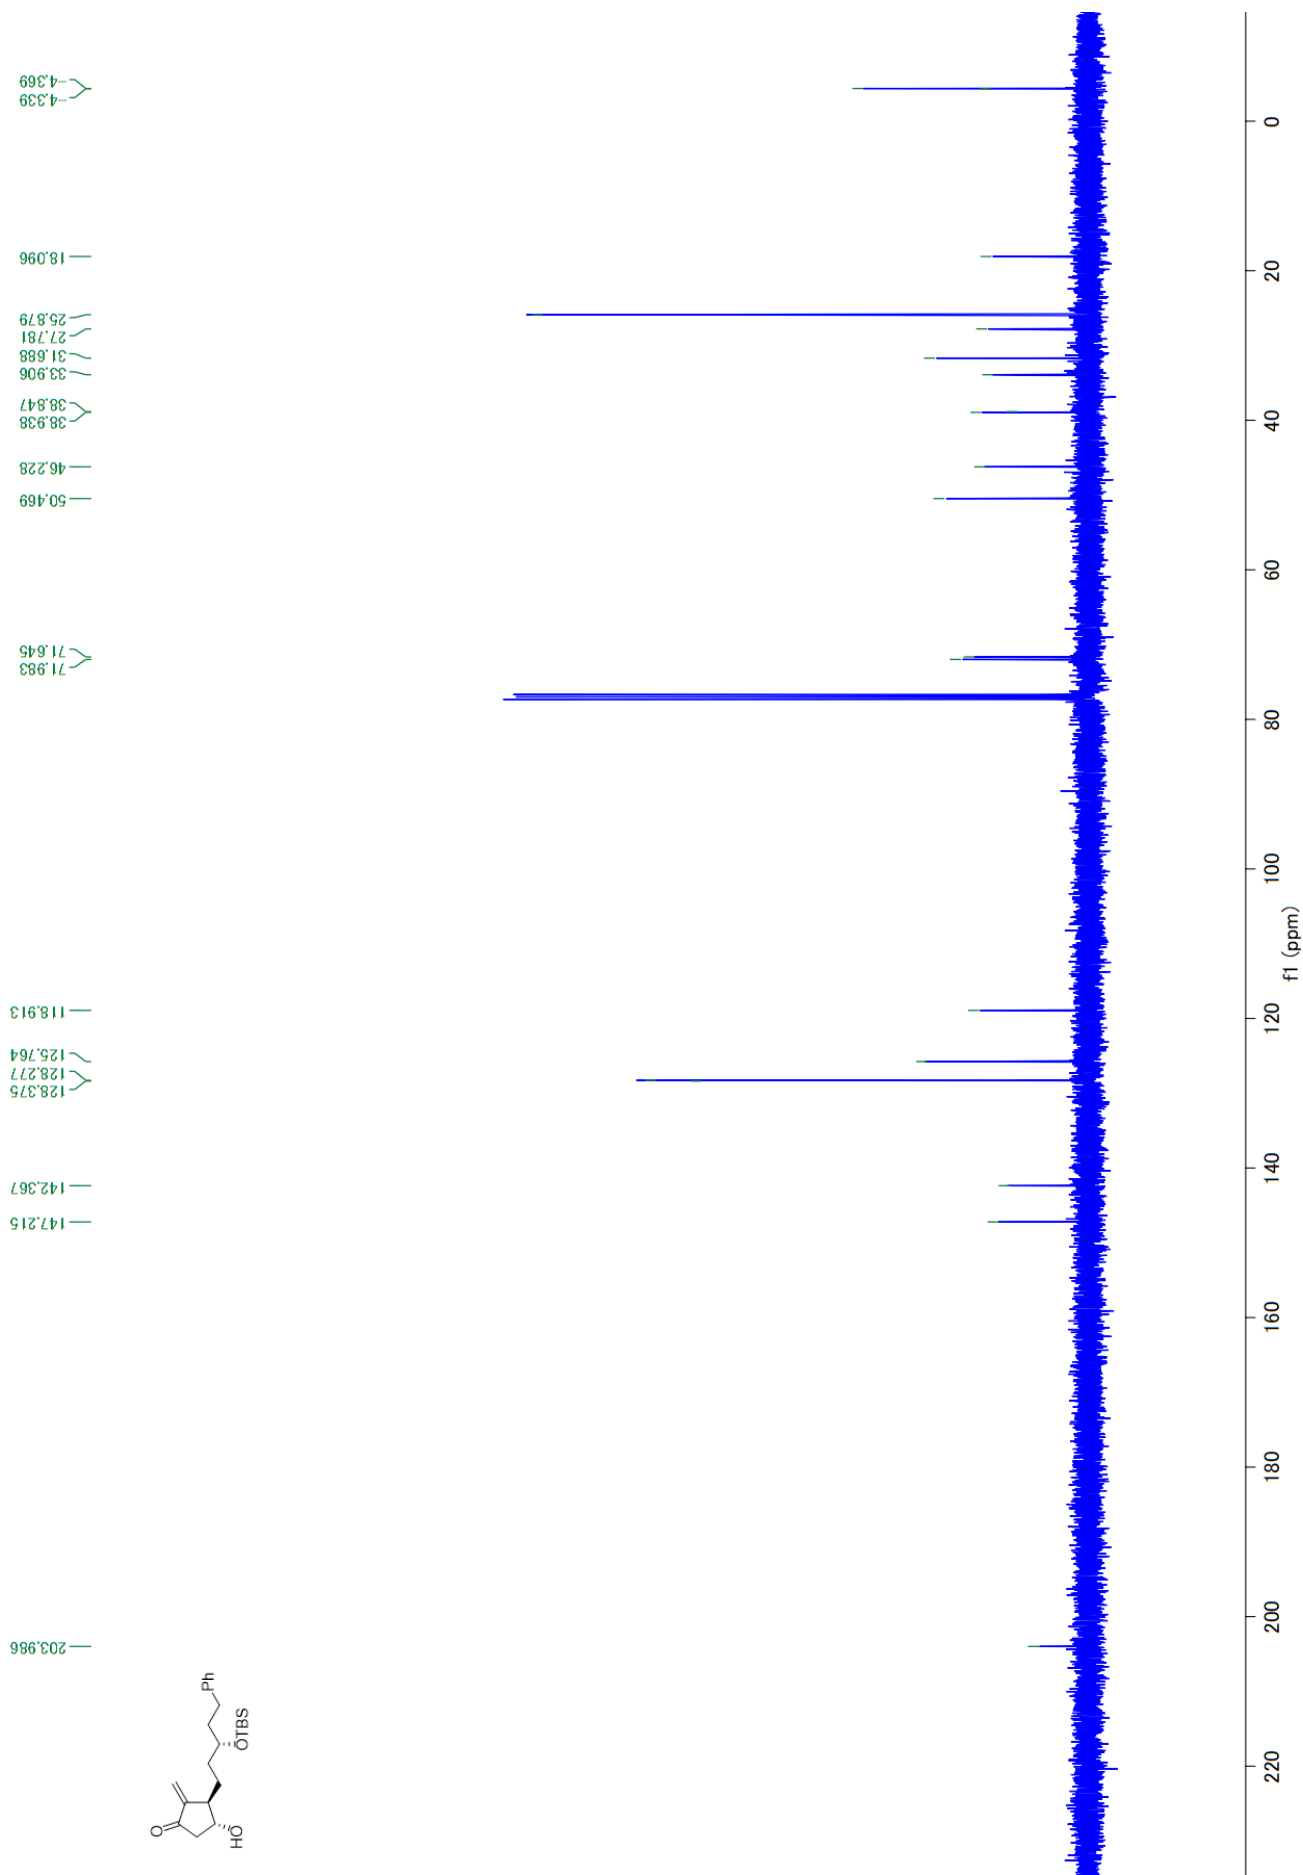



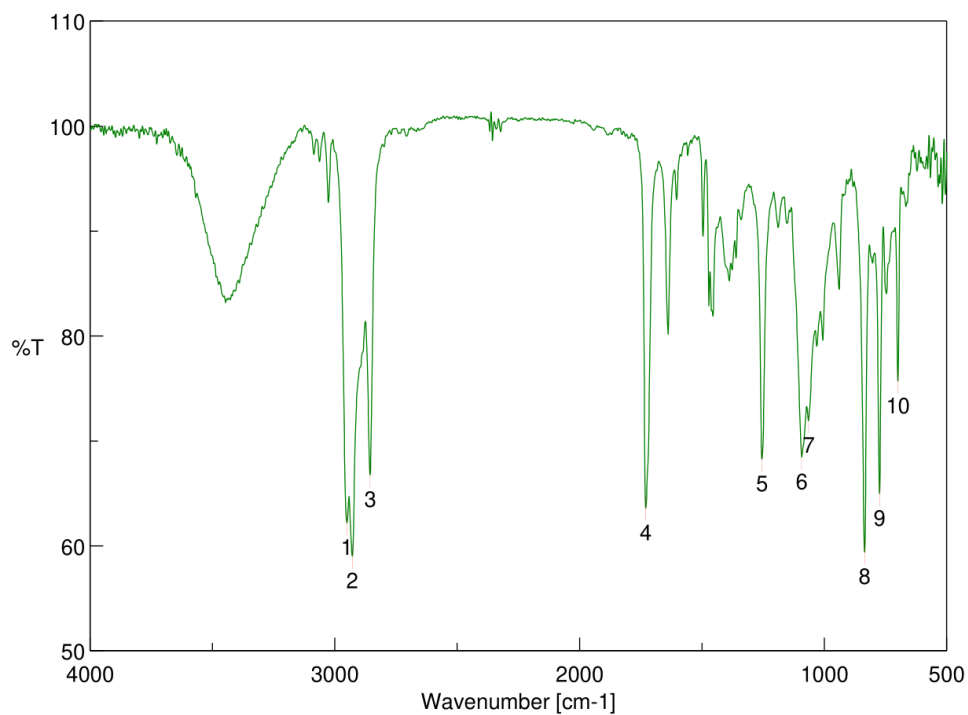

[ ピーク検出結果 ]

| No. | 位置      | 強度      | No. | 位置      | 強度      |
|-----|---------|---------|-----|---------|---------|
| 1   | 2950.55 | 62.1975 | 2   | 2928.38 | 59.013  |
| 3   | 2856.06 | 66.7459 | 4   | 1729.83 | 63.5885 |
| 5   | 1254.47 | 68.2806 | 6   | 1092.48 | 68.4626 |
| 7   | 1064.51 | 71.9217 | 8   | 835.026 | 59.4085 |
| 9   | 774.279 | 64.9788 | 10  | 699.069 | 75.6887 |

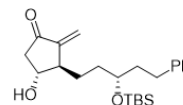

# HPLC chart of compound 17 after deprotection of 3

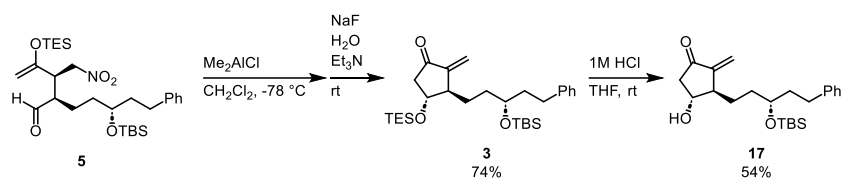

ページ 1/1

## 面積%レポート

ファイル名: C:\Documents and Settings\kawauchi\My Documents\cyclopentane AS-H 99vs1 1ml\_rac.dat  
 サンプル名: C:\EZChrom Elite\Enterprise\Projects\Default\Method\99vs1.met  
 ユーザー名: System  
 分析日時: 2023/03/17 12:20:32  
 印刷日時: 2023/03/29 12:02:57  
 60nm

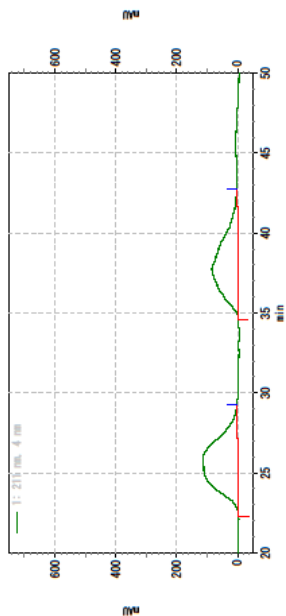

| Retention Time (min) | Area      | Area%   |
|----------------------|-----------|---------|
| 211.211              | 88203166  | 55.760  |
| 37.67                | 79190337  | 44.840  |
| 177.99503            | 177399503 | 100.000 |

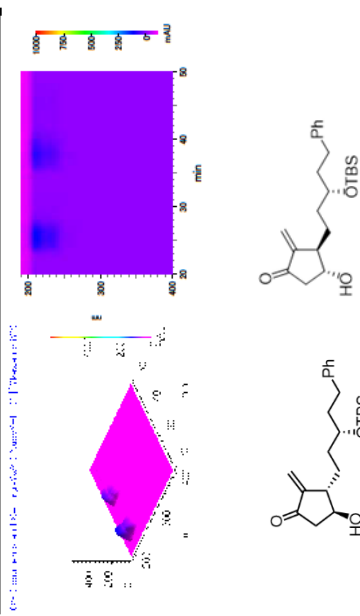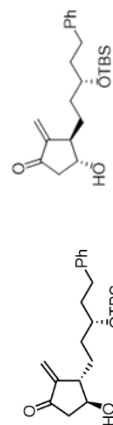

ページ 1/1

## 面積%レポート

ファイル名: C:\Documents and Settings\kawauchi\My Documents\cyclopentane AS-H 99vs1 1ml\_chi.dat  
 サンプル名: C:\EZChrom Elite\Enterprise\Projects\Default\Method\99vs1.met  
 ユーザー名: System  
 分析日時: 2023/03/29 12:40:03  
 印刷日時: 2023/03/29 14:26:19  
 60nm

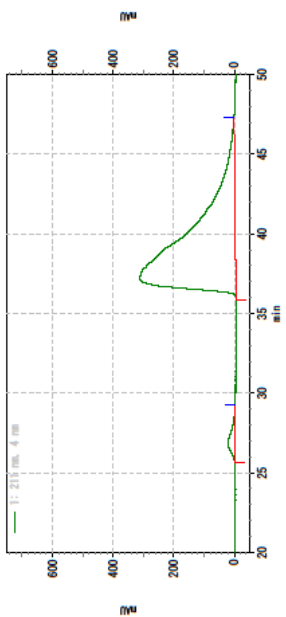

| Retention Time (min) | Area      | Area%   |
|----------------------|-----------|---------|
| 211.211              | 8332036   | 2.657   |
| 37.31                | 305276125 | 97.343  |
| 313.608161           | 313608161 | 100.000 |

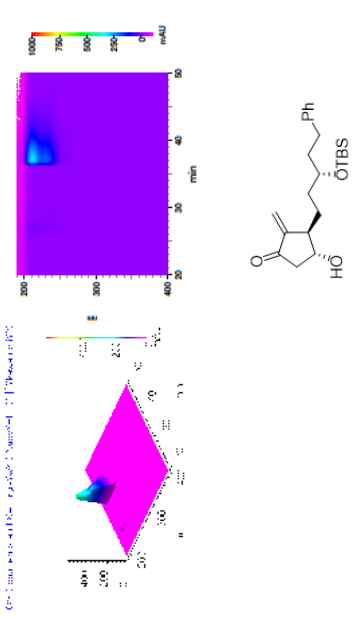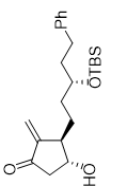

# HPLC chart of **17** after Mukaiyama aldol reaction

ページ 1/1

面積%レポート

ディレクトリ名: C:\Documents and Settings\藤原 理科\Desktop\17  
 Settings\実験理科大学リソース\トップHPLCデータ\kawauchi\2023-03-17 12-19-46 kawauchi\cyclopentane AS-H 99vs1.mil\_rac.dat  
 ファイル名: C:\EZChrom Elite\Enterprise\Projects\Default\Method99vs1.met  
 システム名: System  
 分析日時: 2023/03/17 12:20:32  
 印刷日時: 2023/03/29 12:02:57  
 60mm

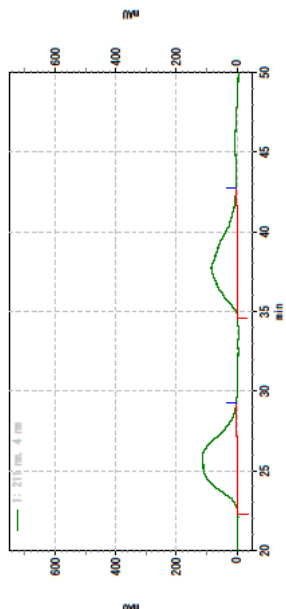

1: 211 ml, 4  
 経過時間

| PK # | Name | Retention Time | Area     | Area%  |
|------|------|----------------|----------|--------|
| 1    |      | 26.41          | 85209166 | 55.360 |
| 2    |      | 37.67          | 79190337 | 44.640 |

0: 211 ml, 4  
 経過時間

| PK # | Name | Retention Time | Area     | Area%  |
|------|------|----------------|----------|--------|
| 1    |      | 26.41          | 85209166 | 55.360 |
| 2    |      | 37.67          | 79190337 | 44.640 |

0: 211 ml, 4  
 経過時間

| PK # | Name | Retention Time | Area     | Area%  |
|------|------|----------------|----------|--------|
| 1    |      | 26.41          | 85209166 | 55.360 |
| 2    |      | 37.67          | 79190337 | 44.640 |

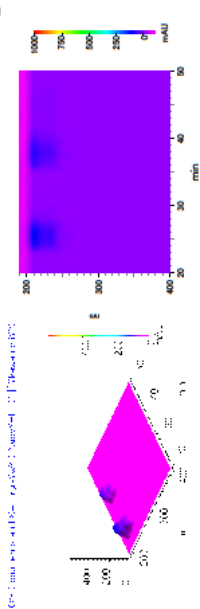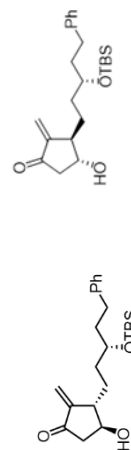

ページ 1/1

面積%レポート

ディレクトリ名: C:\Documents and Settings\藤原 理科\Desktop\17  
 Settings\実験理科大学リソース\トップHPLCデータ\kawauchi\2023-03-29 15-31-35 kawauchi\cyclopentane AS-H 99vs1.mil\_chi2.dat  
 ファイル名: C:\EZChrom Elite\Enterprise\Projects\Default\Method99vs1.met  
 システム名: System  
 分析日時: 2023/03/29 15:32:13  
 印刷日時: 2023/03/29 16:46:15  
 60mm

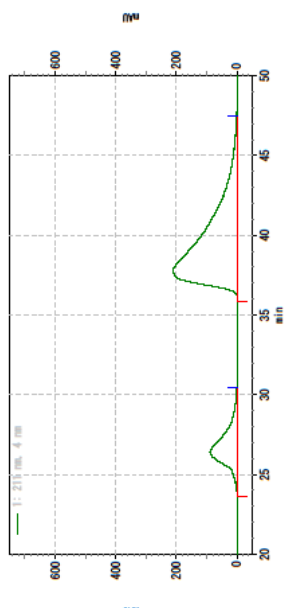

1: 211 ml, 4  
 経過時間

| PK # | Name | Retention Time | Area      | Area%  |
|------|------|----------------|-----------|--------|
| 1    |      | 26.41          | 4540205   | 18.421 |
| 2    |      | 37.77          | 201062114 | 81.576 |

0: 211 ml, 4  
 経過時間

| PK # | Name | Retention Time | Area      | Area%  |
|------|------|----------------|-----------|--------|
| 1    |      | 26.41          | 4540205   | 18.421 |
| 2    |      | 37.77          | 201062114 | 81.576 |

0: 211 ml, 4  
 経過時間

| PK # | Name | Retention Time | Area      | Area%  |
|------|------|----------------|-----------|--------|
| 1    |      | 26.41          | 4540205   | 18.421 |
| 2    |      | 37.77          | 201062114 | 81.576 |

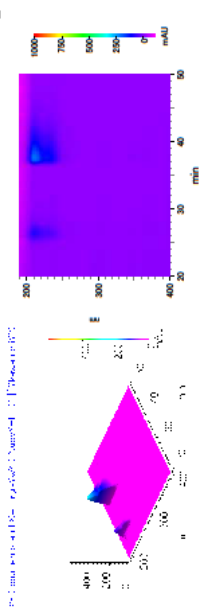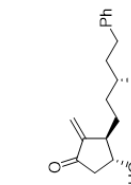

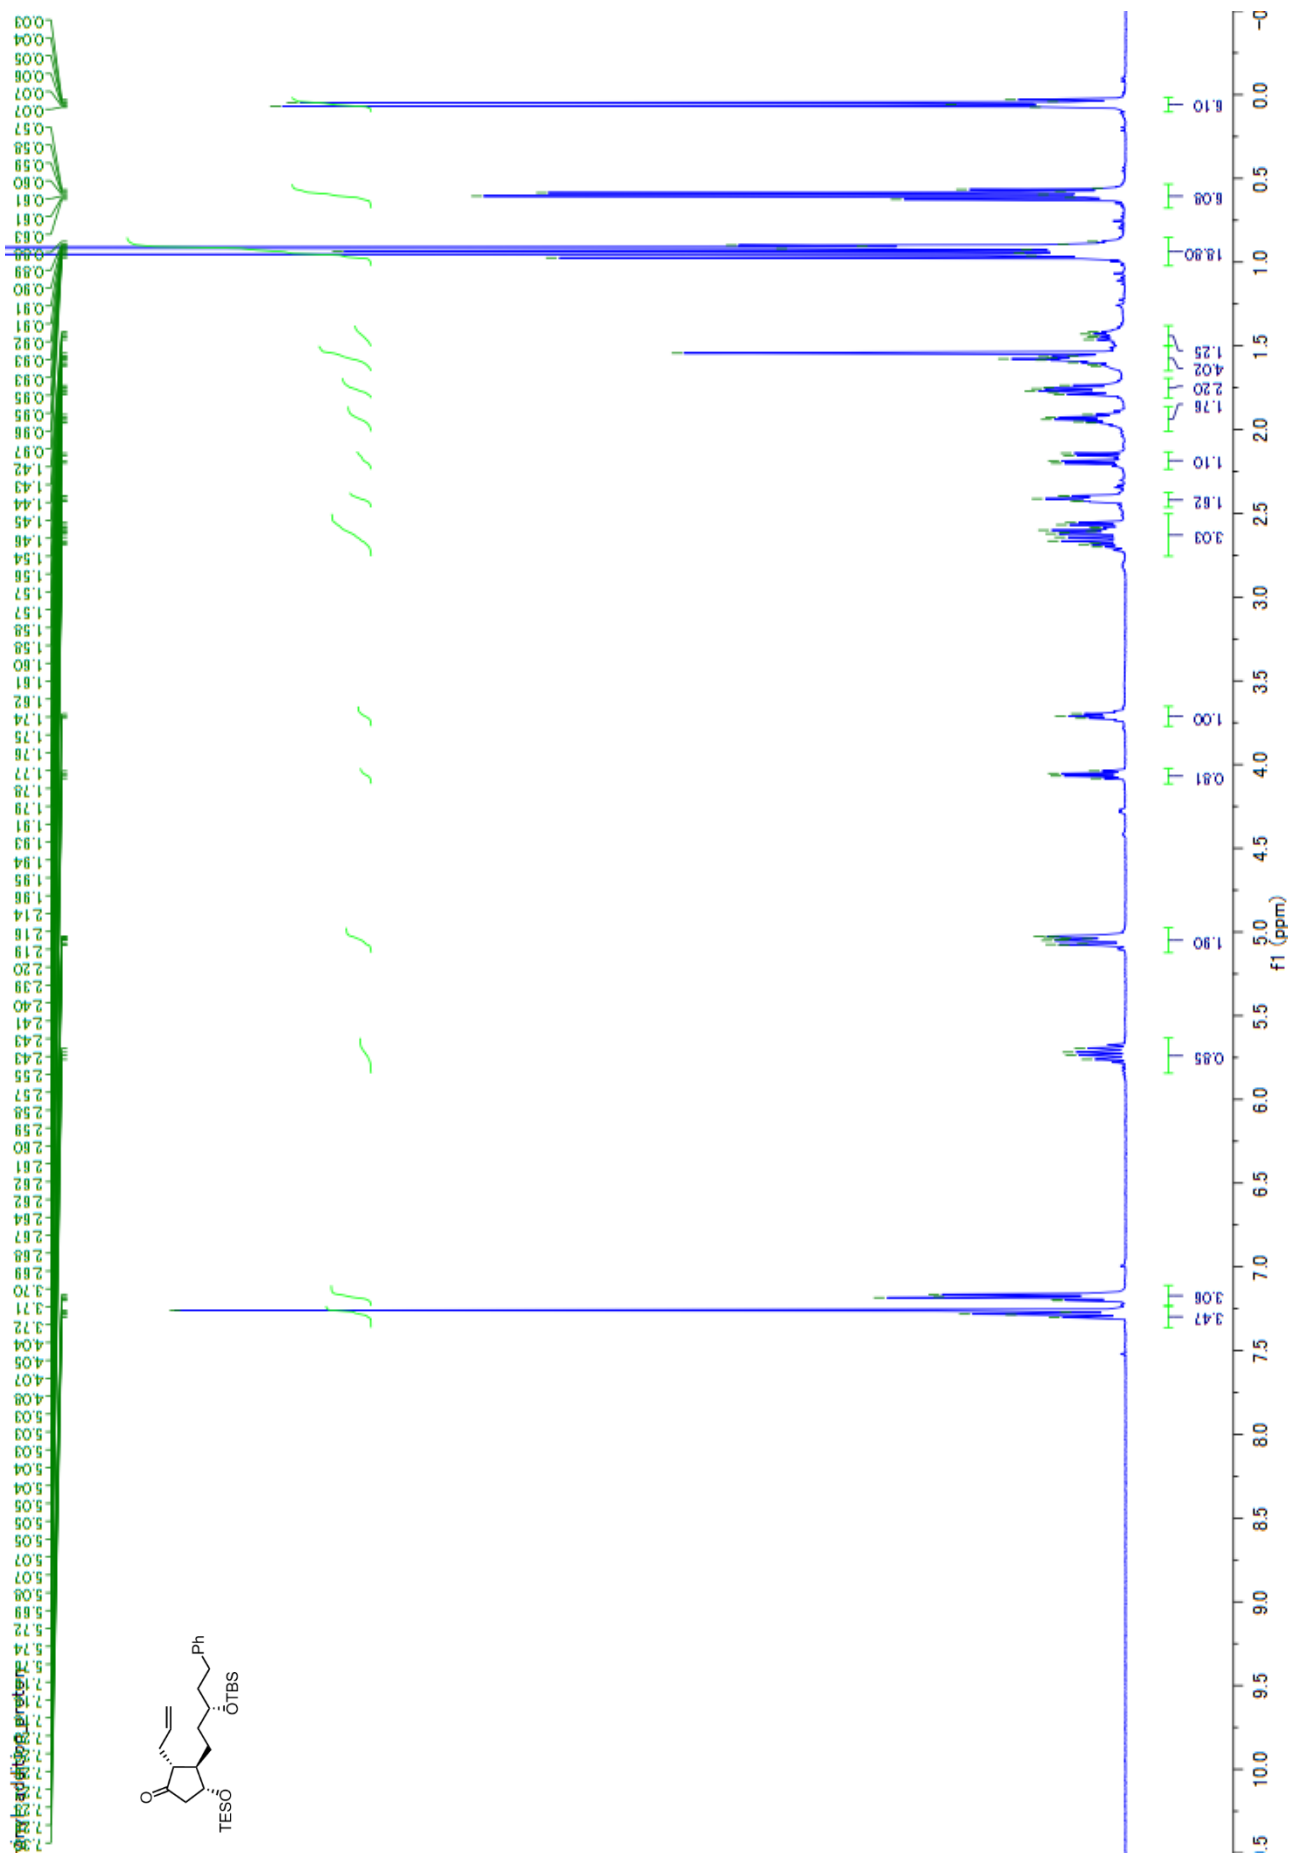

vinylic-addition:carbon

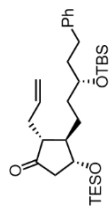

117.12  
128.37  
128.27  
125.79  
142.52  
135.58  
217.85  
77.32  
77.20  
77.00  
76.68  
73.12  
72.00  
53.00  
48.85  
47.73  
38.01  
34.30  
33.84  
31.70  
27.78  
25.90  
25.87  
18.12

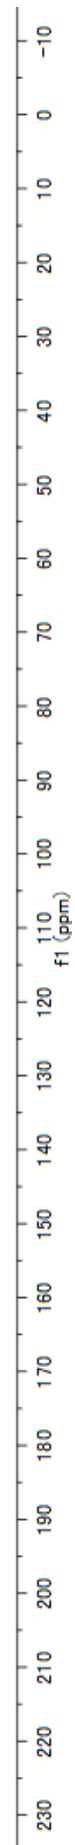

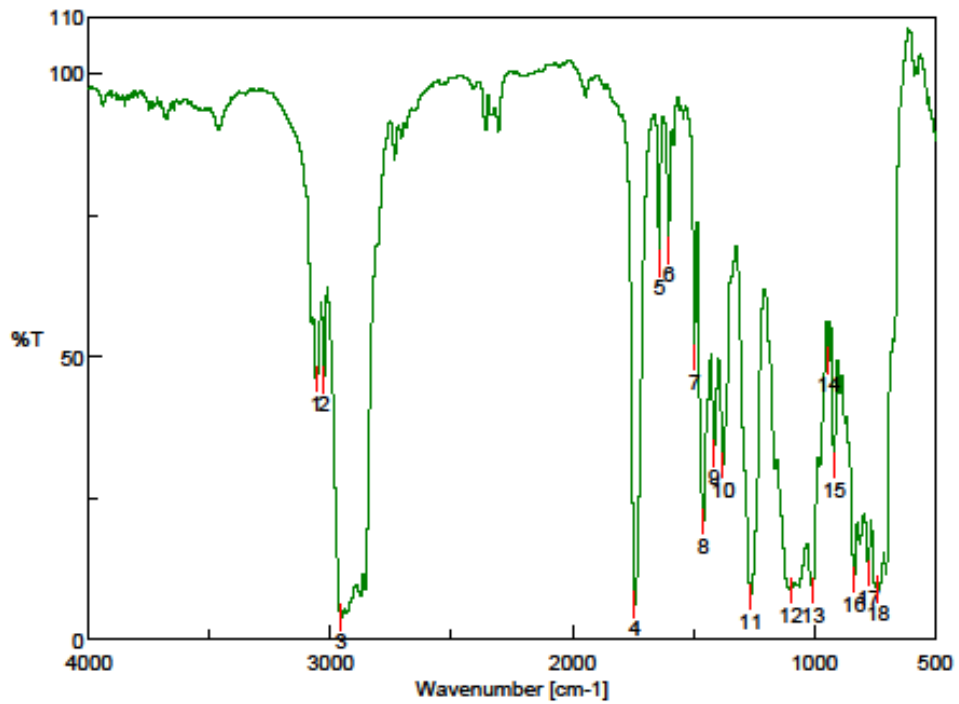

[ ピーク検出結果 ]

| No. | 位置      | 強度      | No. | 位置      | 強度      |
|-----|---------|---------|-----|---------|---------|
| 1   | 3060.48 | 45.9578 | 2   | 3027.69 | 45.6808 |
| 3   | 2956.34 | 3.75561 | 4   | 1742.37 | 6.12336 |
| 5   | 1641.13 | 66.4076 | 6   | 1602.56 | 68.5953 |
| 7   | 1495.53 | 49.7077 | 8   | 1457.92 | 20.7747 |
| 9   | 1414.53 | 32.7735 | 10  | 1376.93 | 30.7499 |
| 11  | 1264.11 | 7.42121 | 12  | 1097.3  | 8.66136 |
| 13  | 1005.7  | 8.63374 | 14  | 940.128 | 49.2395 |
| 15  | 917.95  | 30.6132 | 16  | 835.99  | 10.4936 |
| 17  | 775.244 | 11.6453 | 18  | 736.674 | 8.71372 |

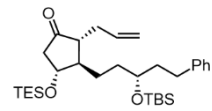

Comparison of  $^1\text{H}$  NMR of vinyl addition

entry 3

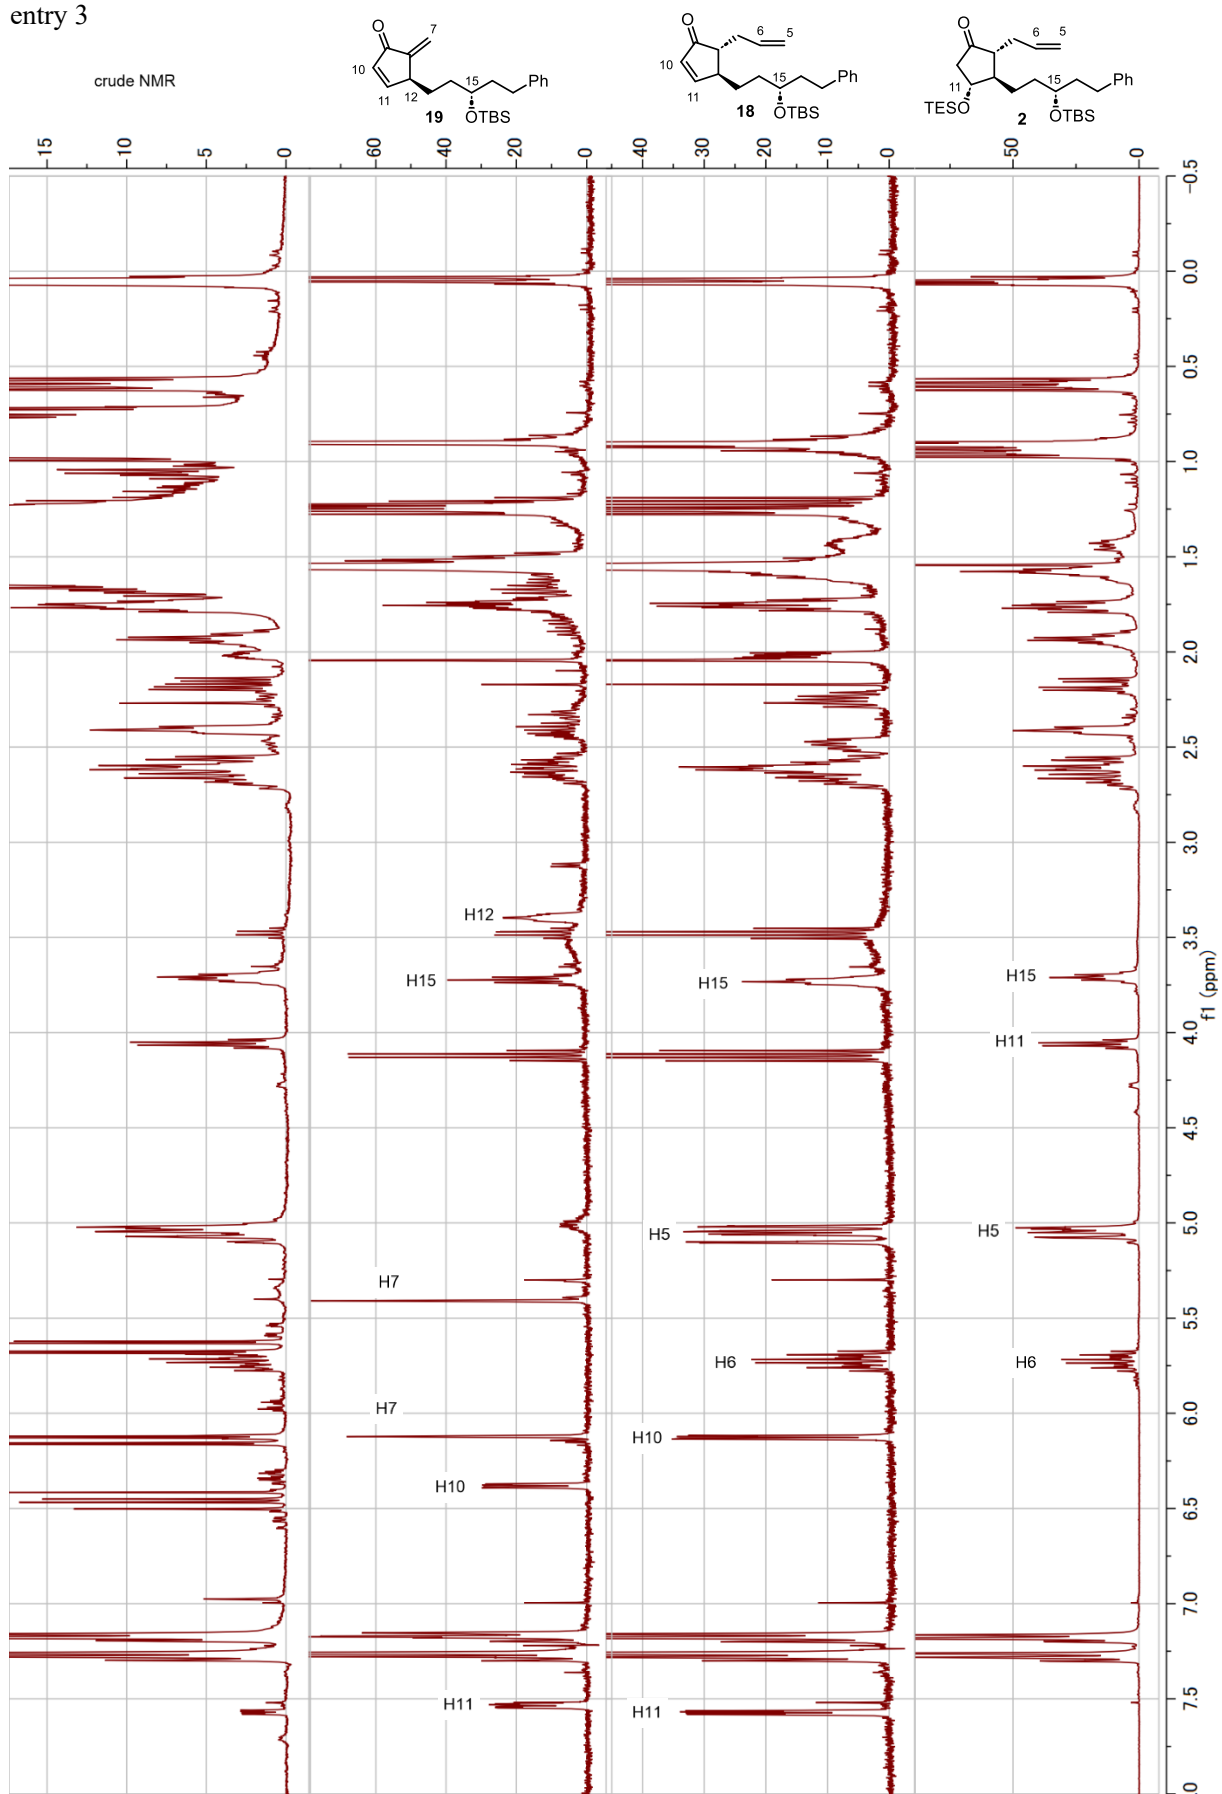

entry 4

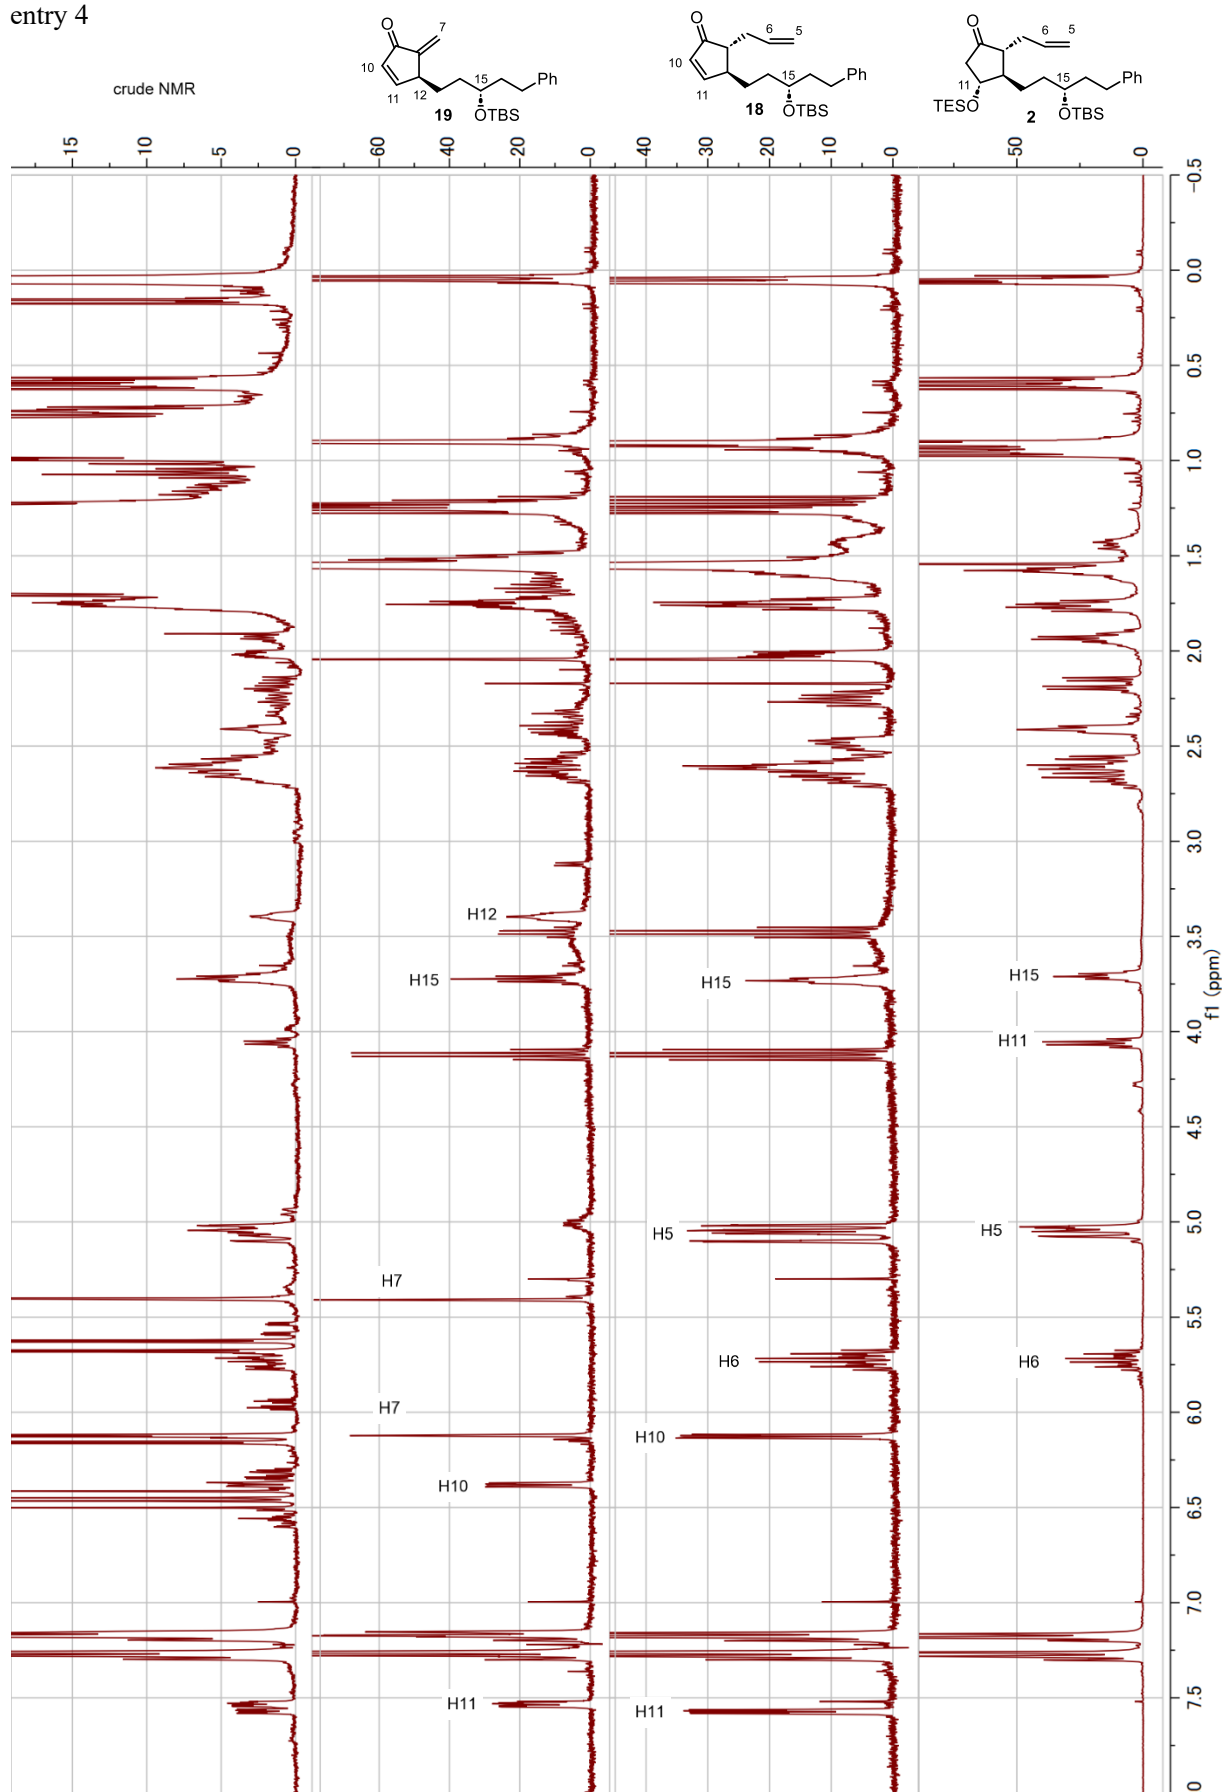



entry 7

crude NMR

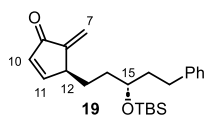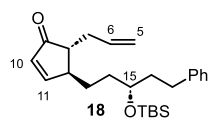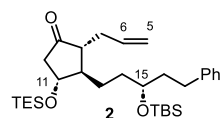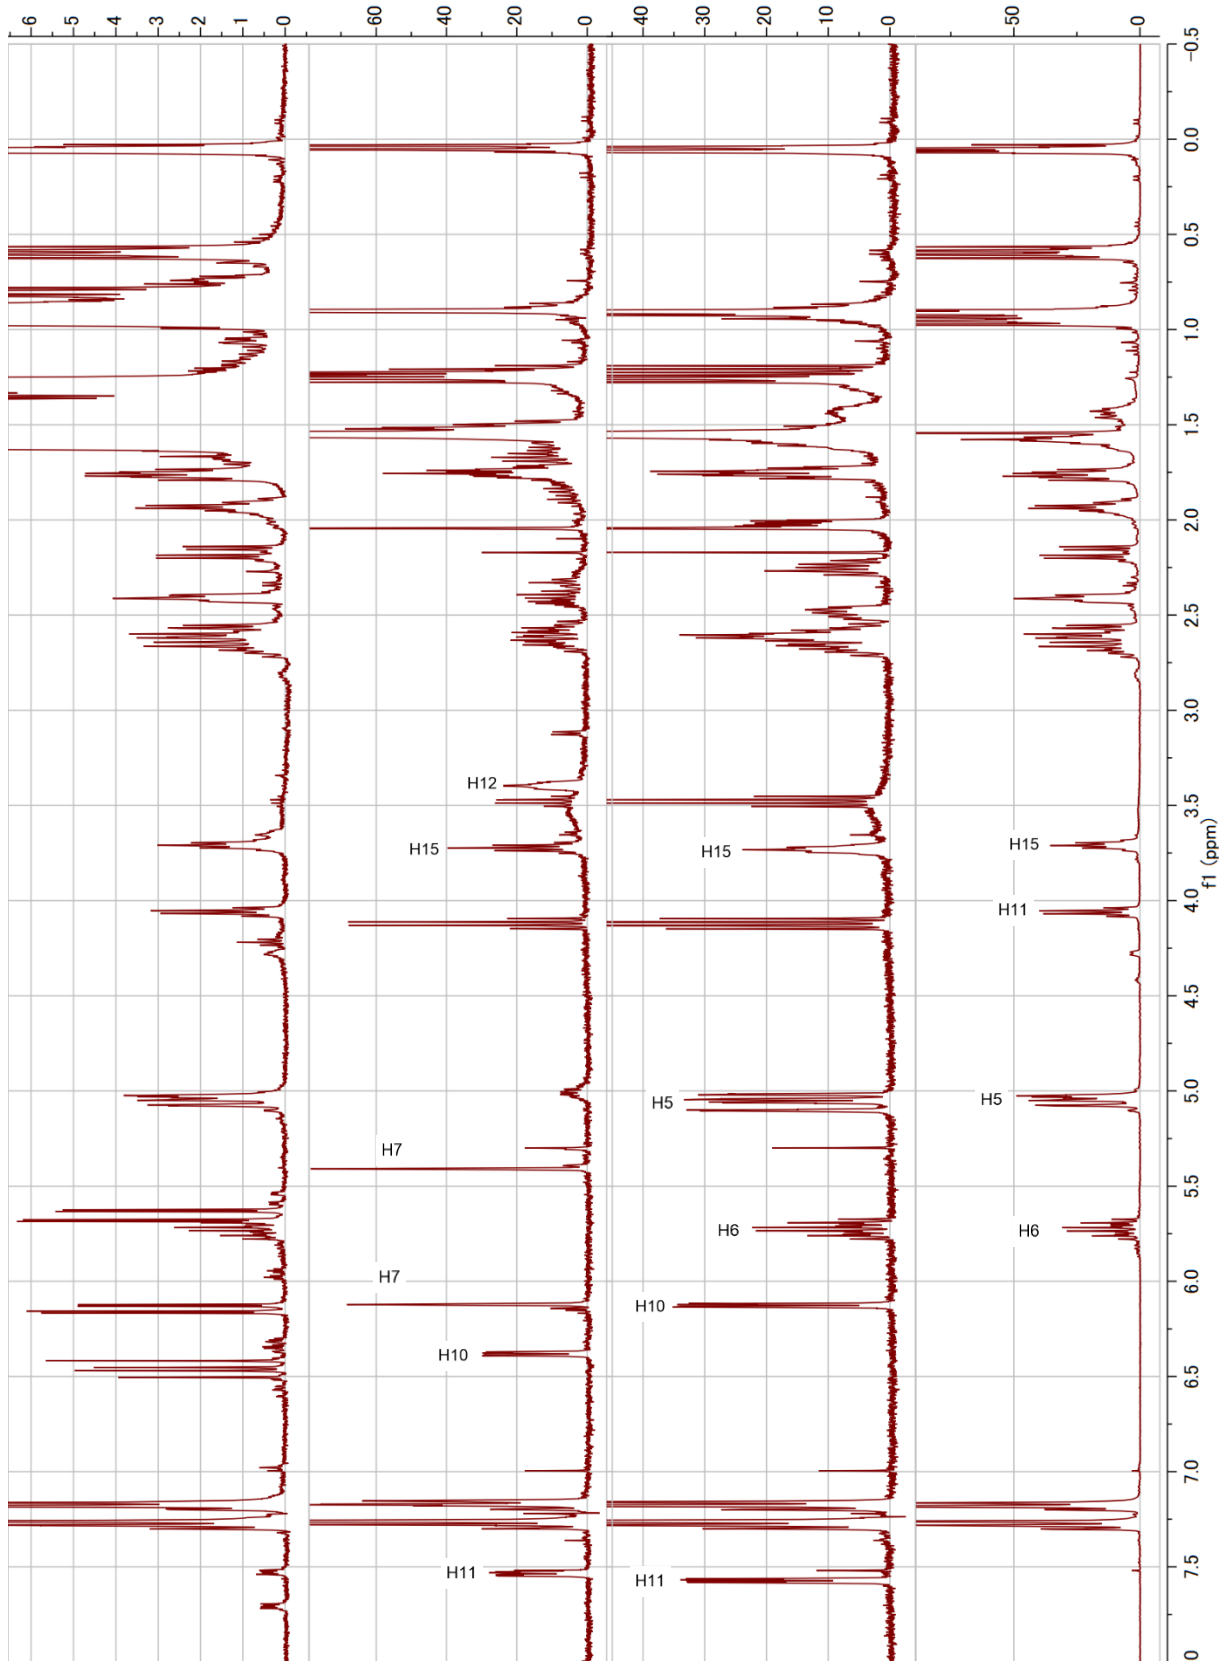

Latamoprost\_proton

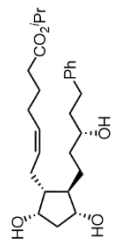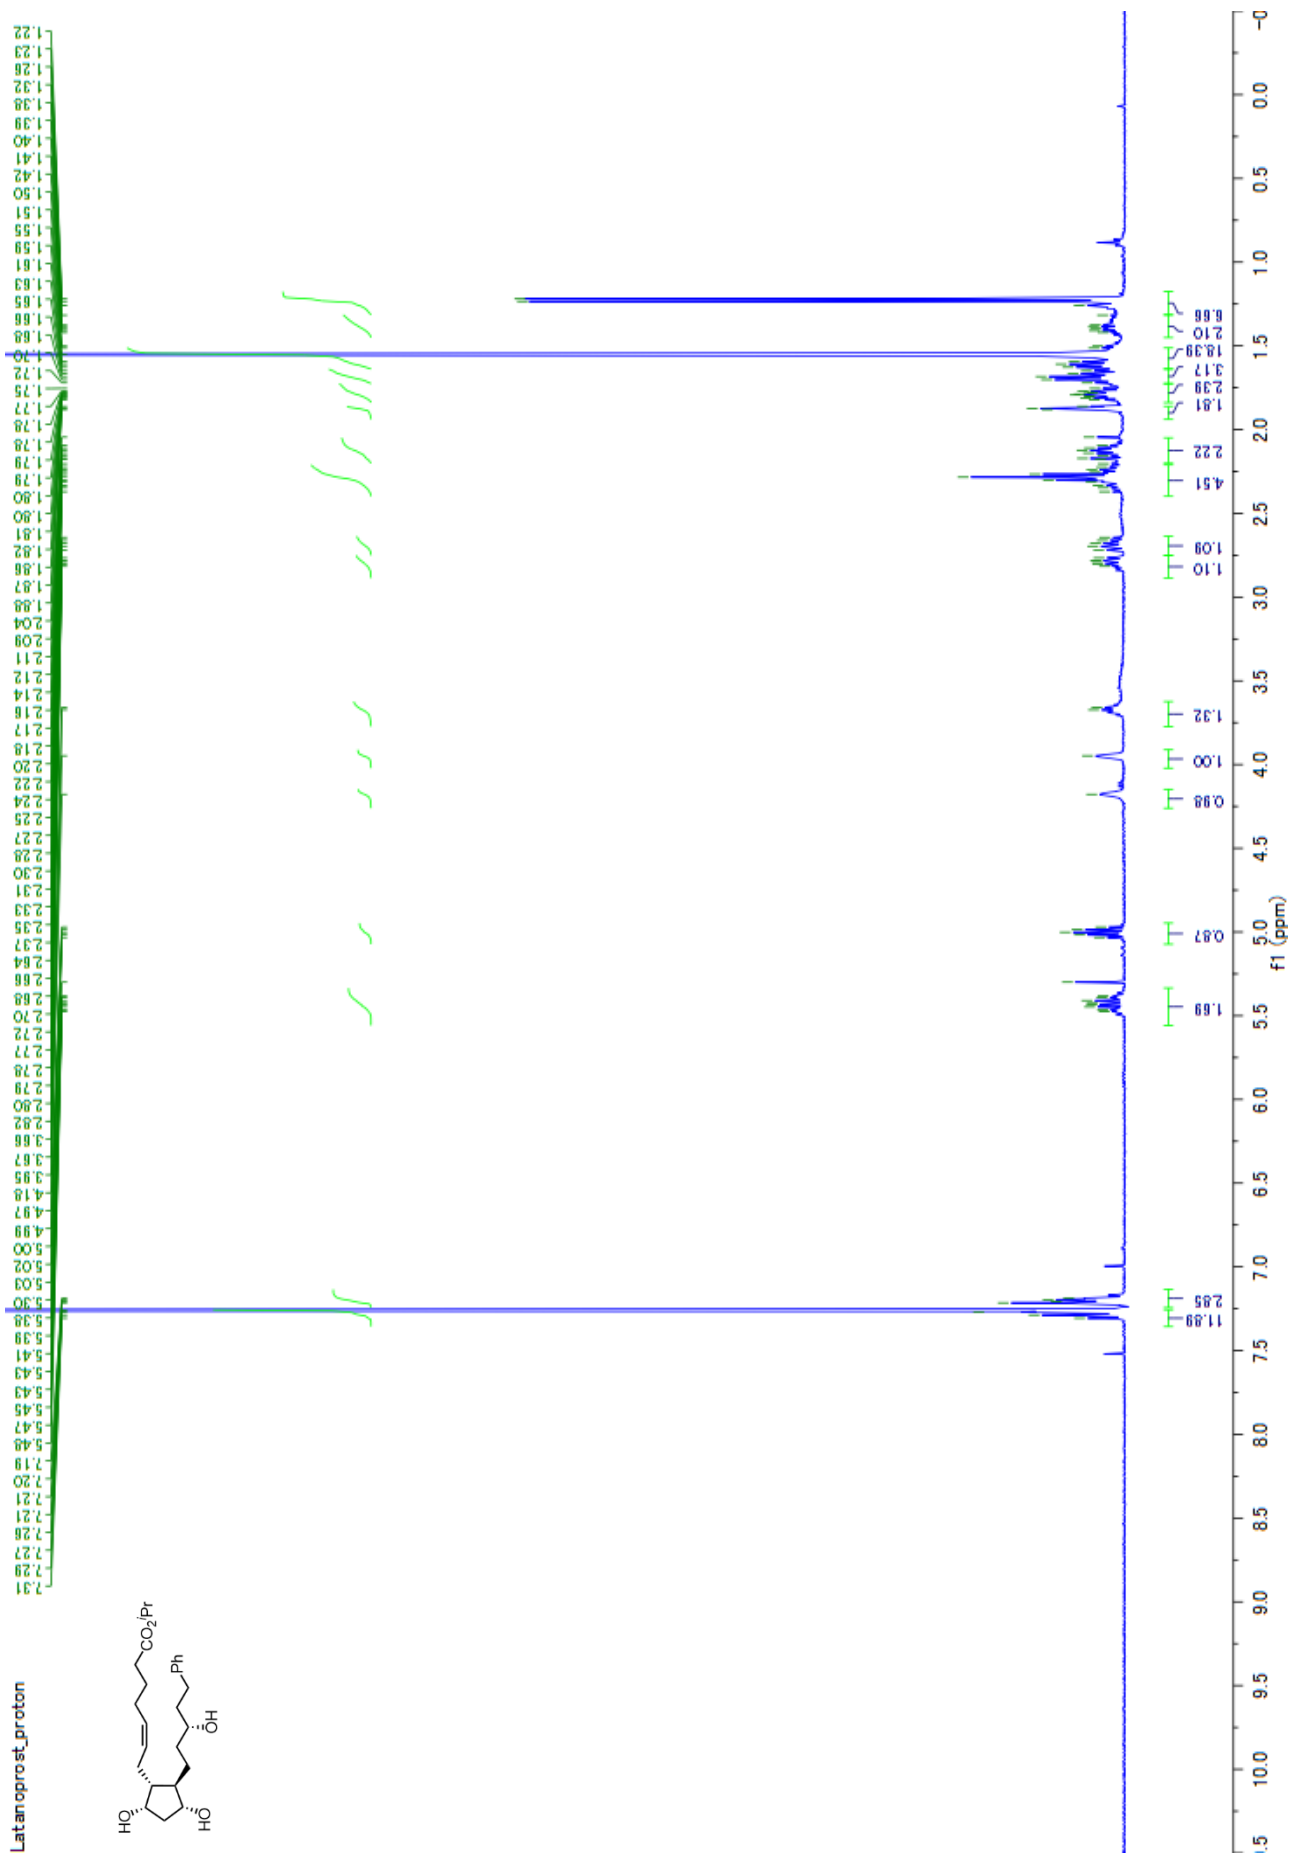

Coparison of <sup>1</sup>H NMR of latanoprost

Reported<sup>4)</sup>

Synthesized

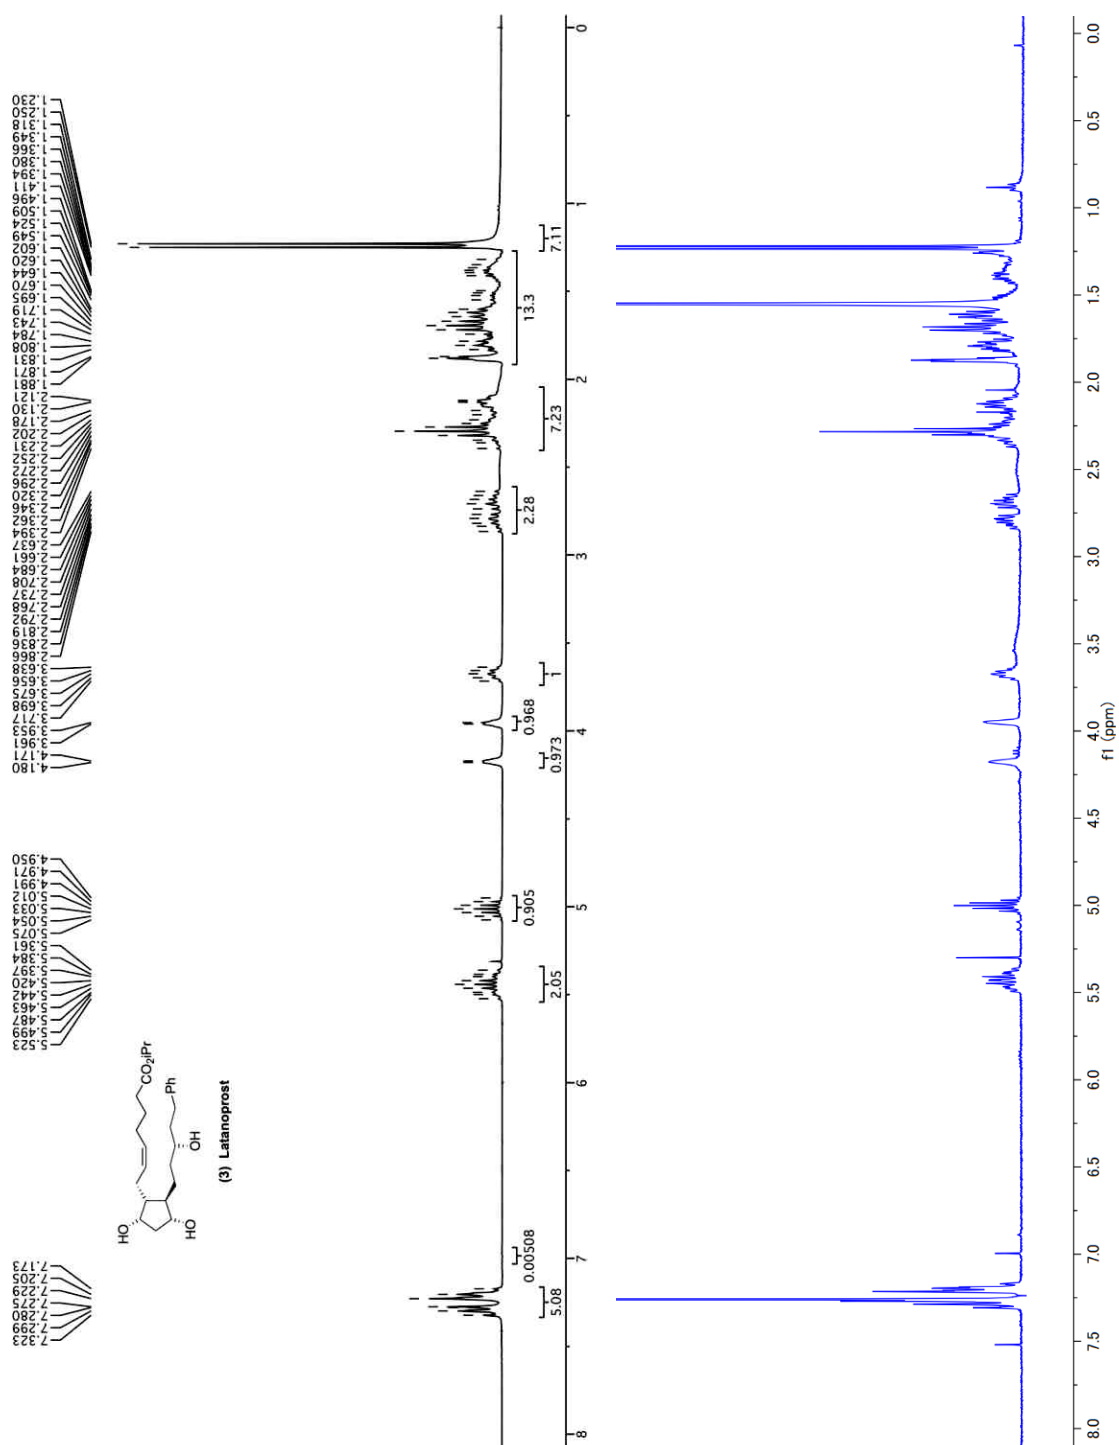

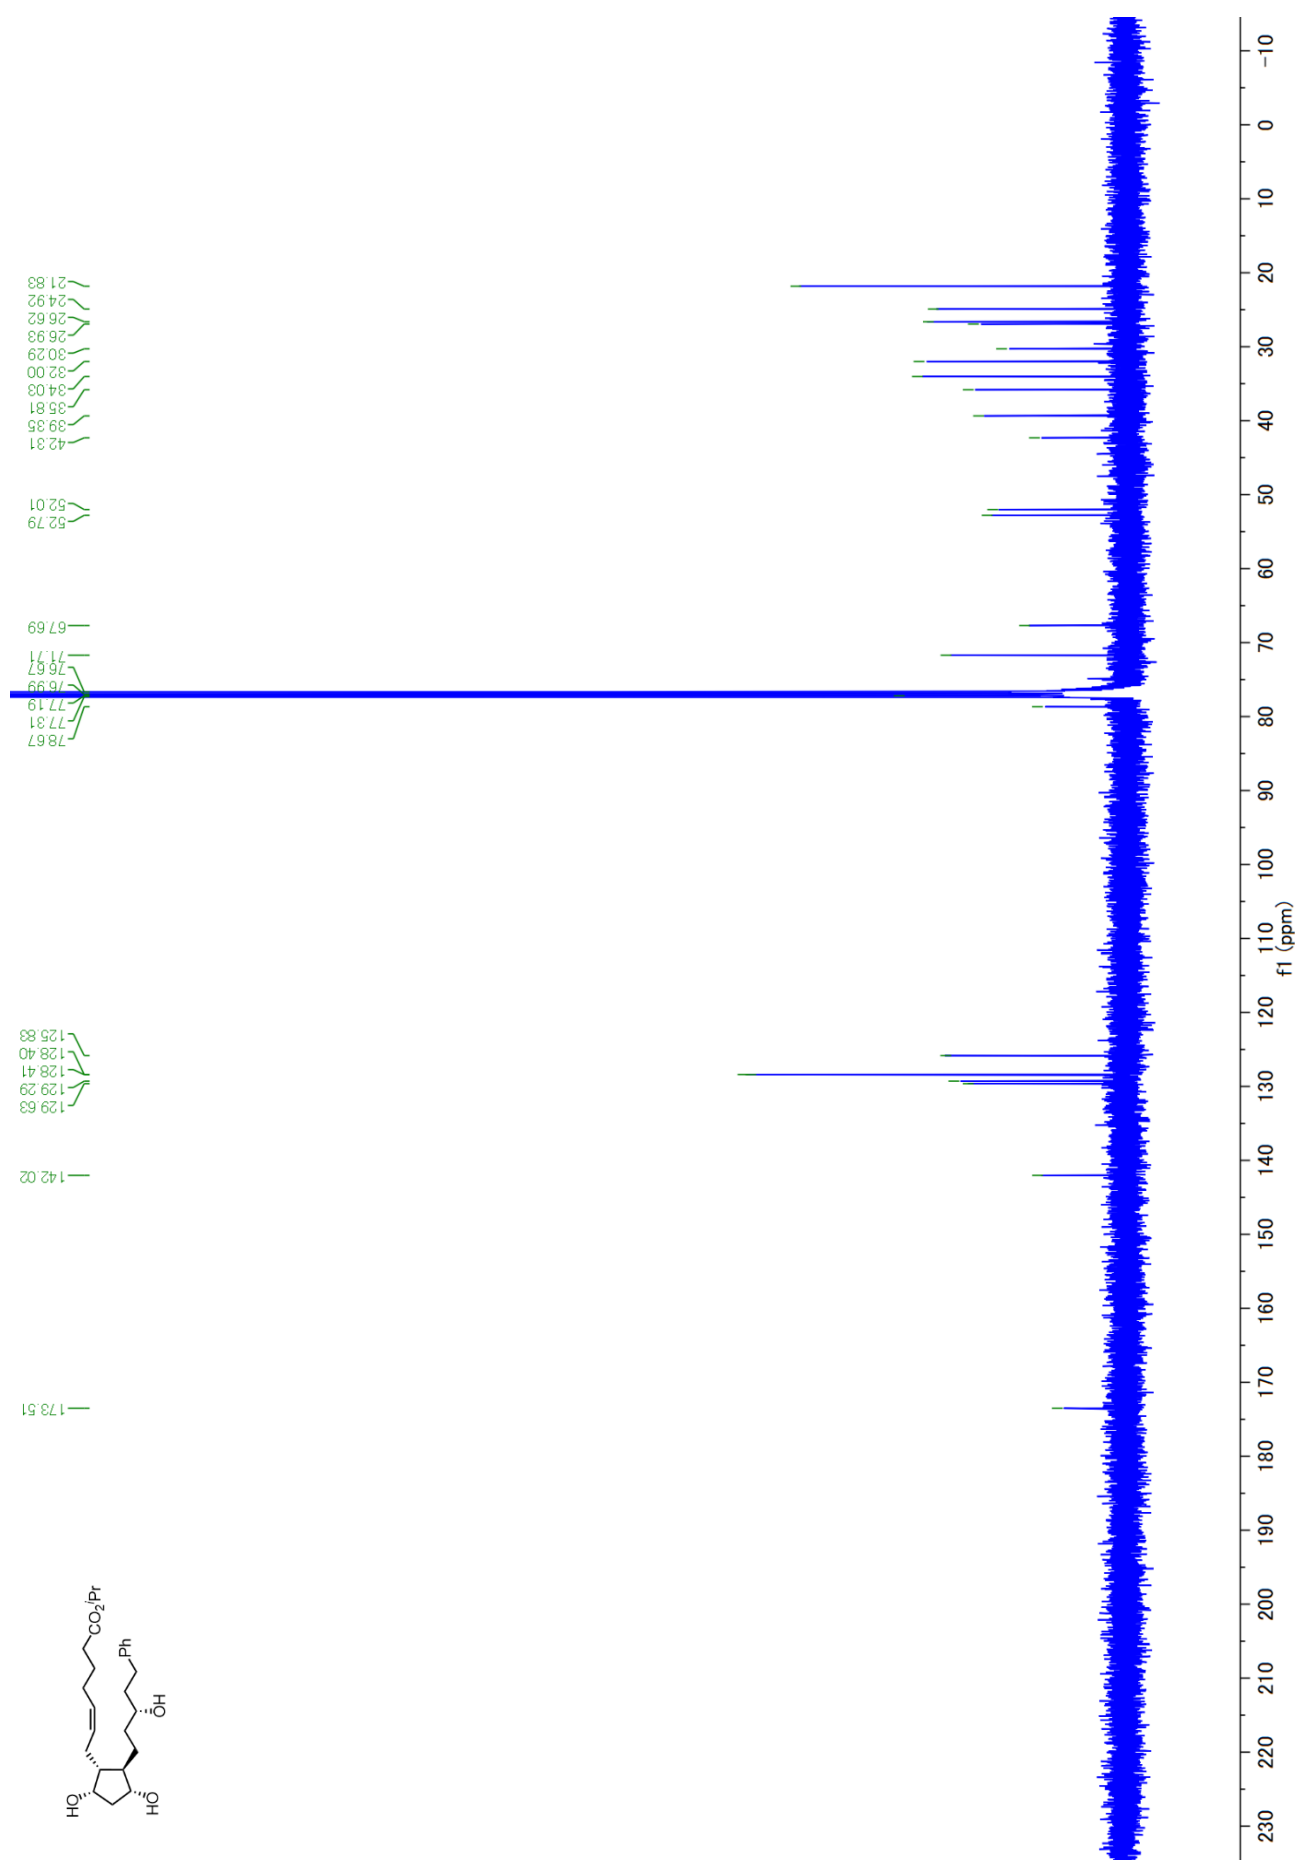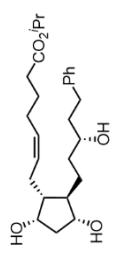

Supplement: d3sc02978f1.pdf [file d3sc02978f1.pdf]
